# Supplementary material for: Protocol for the specialist supervised individualised multifactorial treatment of new clinically diagnosed type 2 diabetes in general practice (IDA): a prospective controlled multicentre open-label intervention study
Source: PubMed Central journal article supplement — BMJ Open. 2017 Dec 10;7(12):e017493. doi: 10.1136/bmjopen-2017-017493 (PMC5778341; doi:10.1136/bmjopen-2017-017493), 2017-12-10
Supplement: bmjopen-2017-017493.draft_revisions.pdf [file bmjopen-2017-017493.draft_revisions.pdf]

# BMJ Open

BMJ Open is committed to open peer review. As part of this commitment we make the peer review history of every article we publish publicly available.

When an article is published we post the peer reviewers' comments and the authors' responses online. We also post the versions of the paper that were used during peer review. These are the versions that the peer review comments apply to.

The versions of the paper that follow are the versions that were submitted during the peer review process. They are not the versions of record or the final published versions. They should not be cited or distributed as the published version of this manuscript.

BMJ Open is an open access journal and the full, final, typeset and author-corrected version of record of the manuscript is available on our site with no access controls, subscription charges or pay-per-view fees (<http://bmjopen.bmj.com>).

If you have any questions on BMJ Open's open peer review process please email [editorial.bmjopen@bmj.com](mailto:editorial.bmjopen@bmj.com)

# BMJ Open

**Protocol for the specialist supervised Individualized  
multifactorial treatment of new clinically diagnosed type 2  
diabetes in general practice (IDA)  
– A prospective controlled multicenter open-label  
intervention study**

|                                 |                                                                                                                                                                                                                                                                                                                                                                                                                                                                                                                                                                                                                                                                                                                                                                                                                                                                                                                                                                                                                                                                                                                                                                                                                                                               |
|---------------------------------|---------------------------------------------------------------------------------------------------------------------------------------------------------------------------------------------------------------------------------------------------------------------------------------------------------------------------------------------------------------------------------------------------------------------------------------------------------------------------------------------------------------------------------------------------------------------------------------------------------------------------------------------------------------------------------------------------------------------------------------------------------------------------------------------------------------------------------------------------------------------------------------------------------------------------------------------------------------------------------------------------------------------------------------------------------------------------------------------------------------------------------------------------------------------------------------------------------------------------------------------------------------|
| Journal:                        | <i>BMJ Open</i>                                                                                                                                                                                                                                                                                                                                                                                                                                                                                                                                                                                                                                                                                                                                                                                                                                                                                                                                                                                                                                                                                                                                                                                                                                               |
| Manuscript ID                   | bmjopen-2017-017493                                                                                                                                                                                                                                                                                                                                                                                                                                                                                                                                                                                                                                                                                                                                                                                                                                                                                                                                                                                                                                                                                                                                                                                                                                           |
| Article Type:                   | Protocol                                                                                                                                                                                                                                                                                                                                                                                                                                                                                                                                                                                                                                                                                                                                                                                                                                                                                                                                                                                                                                                                                                                                                                                                                                                      |
| Date Submitted by the Author:   | 26-Apr-2017                                                                                                                                                                                                                                                                                                                                                                                                                                                                                                                                                                                                                                                                                                                                                                                                                                                                                                                                                                                                                                                                                                                                                                                                                                                   |
| Complete List of Authors:       | <p>Stidsen, Jacob; Diabetes Research Centre, Centre for Individualized Medicine in Arterial Diseases, Odense University Hospital, Department of Endocrinology</p> <p>Nielsen, Jens; Diabetes Research Centre, Centre for Individualized Medicine in Arterial Diseases, Odense University Hospital, Department of Endocrinology</p> <p>Henriksen, Jan; Diabetes Research Centre, Centre for Individualized Medicine in Arterial Diseases, Odense University Hospital, Department of Endocrinology</p> <p>Friberg, Søren; Diabetes Research Centre, Centre for Individualized Medicine in Arterial Diseases, Odense University Hospital, Department of Endocrinology</p> <p>Thomsen, Reimar; Aarhus University Hospital, Clinical Epidemiology</p> <p>Olesen, Thomas; Diabetes Research Centre, Centre for Individualized Medicine in Arterial Diseases, Odense University Hospital, Department of Endocrinology</p> <p>Olsen, Michael; Diabetes Research Centre, Centre for Individualized Medicine in Arterial Diseases, Odense University Hospital, Department of Endocrinology</p> <p>Beck-Nielsen, Henning; Diabetes Research Centre, Centre for Individualized Medicine in Arterial Diseases, Odense University Hospital, Department of Endocrinology</p> |
| <b>Primary Subject Heading</b>: | Diabetes and endocrinology                                                                                                                                                                                                                                                                                                                                                                                                                                                                                                                                                                                                                                                                                                                                                                                                                                                                                                                                                                                                                                                                                                                                                                                                                                    |
| Secondary Subject Heading:      | Patient-centred medicine                                                                                                                                                                                                                                                                                                                                                                                                                                                                                                                                                                                                                                                                                                                                                                                                                                                                                                                                                                                                                                                                                                                                                                                                                                      |
| Keywords:                       | clinical diabetes, insulin sensitivity and resistance, insulin secretion, pathophysiology, individualized treatment, treatment guidelines                                                                                                                                                                                                                                                                                                                                                                                                                                                                                                                                                                                                                                                                                                                                                                                                                                                                                                                                                                                                                                                                                                                     |
|                                 |                                                                                                                                                                                                                                                                                                                                                                                                                                                                                                                                                                                                                                                                                                                                                                                                                                                                                                                                                                                                                                                                                                                                                                                                                                                               |

SCHOLARONE™  
Manuscripts

1  
2  
3  
4  
5  
6 **Protocol for the specialist supervised Individualized multifactorial**  
7 **treatment of new clinically diagnosed type 2 diabetes in general practice**  
8 **(IDA)**  
9

10  
11  
12 **- A prospective controlled multicenter open-label intervention study**  
13  
14

15  
16  
17  
18 Jacob Volmer Stidsen<sup>1</sup>, Jens Steen Nielsen<sup>1</sup>, Jan Erik Henriksen<sup>1</sup>, Søren Gunnar Friberg<sup>1</sup>, Reimar Wernich  
19 Thomsen<sup>2</sup>, Thomas Bastholm Olesen<sup>1</sup>, Michael Hecht Olsen<sup>1</sup>, Henning Beck-Nielsen<sup>1</sup>  
20  
21

22  
23 <sup>1</sup>Diabetes Research Centre, Department of Endocrinology, Centre for Individualized Medicine in Arterial  
24 Diseases, Odense University Hospital, Odense, Denmark  
25

26 <sup>2</sup>Department of Clinical Epidemiology, Aarhus University Hospital, Aarhus, Denmark  
27  
28

29  
30  
31 **Corresponding author:** Henning Beck-Nielsen, Danish Centre for Strategic Research in Type 2 Diabetes  
32 (DD2), Department of Endocrinology M, Diabetes Research Centre, Odense University Hospital,  
33 Kloevervaenget 6, 4th Floor, 5000 Odense C, Denmark, Tel +45 6541 3444, Fax +45 6591 9653, Email  
34 [henning.beck-nielsen@rsyd.dk](mailto:henning.beck-nielsen@rsyd.dk)  
35  
36

37  
38 **Word count:** 6423  
39  
40  
41  
42  
43  
44  
45  
46  
47  
48  
49  
50  
51  
52  
53  
54  
55  
56  
57  
58  
59  
60

**ABSTRACT**

**Introduction.** We present the protocol for a multifactorial intervention study designed to test whether individualized treatment, based on pathophysiological phenotyping and individualized treatment goals, improves type 2 diabetes (T2D) outcomes.

**Methods and analysis.** We will conduct a prospective controlled multicentre open-label intervention study, drawing on the longitudinal cohort of the Danish Centre for Strategic Research in Type 2 Diabetes (DD2). New clinically diagnosed T2D patients in the intervention group will be assigned to receive individualized treatment by their general practitioner. Intervention patients will be compared with a matched control cohort of DD2 patients receiving routine clinical care. Among intervention patients, we will first do pathophysiological phenotyping to classify patients into WHO-defined T2D or other specific types of diabetes (monogenic diabetes, secondary diabetes, etc.). WHO-defined T2D patients will then be further sub-characterized by their beta cell function (BCF) and insulin sensitivity (IS), using the revised homeostatic assessment model, as having either insulinopenic T2D (high IS and low BCF), classical T2D (low IS and low BCF), or hyperinsulinemic T2D (low IS and high BCF). For each sub-type a specific treatment algorithm will target the primary pathophysiological defect. Antihypertensive treatment will be similarly targeted at the specific underlying pathophysiology, characterized by impedance cardiography (relative importance of vascular resistance), intravascular volume, and cardiac inotropy. All treatment goals will be based on individual patient assessment of expected positive versus adverse effects. Web-based and face-to-face individualized lifestyle intervention will also be implemented to empower patients to make a sustainable improvement in daily physical activity and to change to a low-carbohydrate diet.

**Ethics and dissemination.** The study will use well-known pharmacological agents according to their labels; patient safety is therefore considered high. Study results will be published in international peer-reviewed journals. The study is registered at ClinicalTrials.gov, number NCT02015130.

## STRENGTHS AND LIMITATIONS

### *Strengths*

- The IDA study is a nationwide intervention study in primary care, based on a close cooperation between hospital-based diabetes specialists and general practitioners
- The study includes patients who are newly diagnosed with type 2 diabetes and enrolled consecutively without selection
- Endocrinological assessment of pathophysiological phenotypes will form the basis for individual treatment algorithms, made readily available to primary health care providers.
- The study will clarify if an individualized approach to the pharmacological and lifestyle treatment of type 2 diabetes with individualized treatment goals is associated with a range of improved hard outcomes in everyday clinical practice, including micro- and macrovascular complications and death

### *Limitations*

- The study is not randomized, and potential differences in prognostic factors between intervention and control patients need to be addressed by rigorous statistical methods
- Existing high-quality healthcare registries will be used for assessment of outcomes, rather than primary adjudication of end-points

## INTRODUCTION

### *The importance of individualized glycaemic control*

Although current advances in the T2D treatment have reduced mortality [1] and possibly complications[2] among T2D patients, they still suffer excess mortality compared to people without diabetes[3]. Poor glycaemic control has been linked to cardiovascular morbidity, even below the threshold for diabetes [4],

1  
2  
3  
4 and increased mortality is seen in the lowest 10<sup>th</sup> percentile of HbA1c values [5]. This has led to several  
5  
6 trials testing intensive glucose-lowering against moderate glucose-lowering strategies [6-8]. Their results  
7  
8 have been inconclusive. A meta-analysis of trials of intensive glucose-lowering found no effects on  
9  
10 mortality (RR 1.04, 0.91-1.19) or cardiovascular mortality (RR 1.11, 0.86-1.43), while a significant effect (risk  
11  
12 ratio 0.85, 0.74-0.96) was observed for non-fatal myocardial infarction, although in analyses restricted to  
13  
14 high quality studies there was no favorable effect on all myocardial infarctions (RR 1.34, 0.77-2.35). In  
15  
16 addition a potential effect was observed for new or worsening retinopathy (RR 0.85, 0.71-1.03)[9 10]. On  
17  
18 the other hand, intensive glucose control was associated with a significant increase in severe hypoglycemic  
19  
20 events (RR 2.33, 1.62-3.36) [9] The analyzed trials are heterogeneous with respect to diabetes duration and  
21  
22 achieved HbA1c. In UKPDS study intensive glucose lowering to Hba1c of 53 mmol/mol in newly diagnosed  
23  
24 T2D was associated with reduced all-cause mortality [11-13]. Intensive glucose lowering of HbA1c to 6.4 in  
25  
26 the ACCORD trial treating patients with longer duration of diabetes was associated with an increased risk of  
27  
28 all-cause and cardiovascular mortality[6 14]. Post-hoc analyses of the ADVANCE study, which sought to  
29  
30 determine the effect of intensive glucose-lowering compared to standard glucose lowering treatment on  
31  
32 cardiovascular disease, have shown that patients with severe hypoglycemic events have a higher incidence  
33  
34 of micro- and macrovascular events, as well as mortality [15]. These results indicate the necessity for an  
35  
36 individualized approach, with differentiated goals for glycemic control. A tight glycemic goal of 48  
37  
38 mmol/mol seems relevant for many patients with newly diagnosed T2D, while patients with former CVD,  
39  
40 neuropathy and high risk of hypoglycemic events arguably could aim for Hba1c below 58 mmol/mol[16].  
41  
42 Frail patients should aim for relief of hyperglycemic symptoms and treatment should confer a very low  
43  
44 hypoglycemic risk[16].  
45  
46  
47  
48

#### 49 *Improved glycemic control through better pathophysiological phenotyping*

50  
51  
52  
53 Diabetes is classified into type 1 diabetes, Type 2 diabetes, other specific types of diabetes, and gestational  
54  
55 diabetes[17]. It has become increasingly clear that diabetes is a more heterogeneous disease [18]. Data  
56  
57  
58  
59  
60

1  
2  
3  
4 from the Danish Centre for Strategic Research in Type 2 Diabetes (DD2) show that in clinical practice  
5  
6 patients with other specific types of diabetes than T2D (for example, glucocorticoid-induced, LADA or  
7  
8 secondary diabetes) are often misclassified as classical WHO-defined T2D patients. As the pathophysiology  
9  
10 of other specific types of diabetes is potentially different from classical WHO-defined T2D[19] poor  
11  
12 glycemic control could be a consequence if the given treatment does not address the underlying  
13  
14 pathophysiological defect. Moreover, DD2 data also show that the classical WHO-defined T2D population is  
15  
16 heterogeneous and may be further classified according to pathophysiological phenotypes, with potential  
17  
18 implications for appropriate glucose-lowering treatment[20].  
19

#### 20 21 22 *The importance of individualized blood pressure control*

23  
24  
25 Elevated blood pressure in patients with T2D is associated with cardiovascular death, starting with a systolic  
26  
27 blood pressure of 120 mmHg[21]. A recent meta-analysis concluded that when systolic blood pressure was  
28  
29 below 140 mmHg, further reduction in blood pressure was associated with increased risk of cardiovascular  
30  
31 death in patients with diabetes[22]. However, even under optimal conditions, blood pressure control is  
32  
33 very difficult to achieve, with only 50% of patients reaching a systolic blood pressure below 140 mmHg.  
34  
35 Impedance cardiography has been shown to increase the proportion of patients who achieve blood  
36  
37 pressure control[23], although a recent study in a specialized hypertension clinic could not replicate this  
38  
39 finding. However, the incidence of adverse events was significantly reduced in patients in the impedance  
40  
41 group[24]. Impedance cardiography offers an assessment of cardiac contractility, vascular resistance, and  
42  
43 intravascular volume. In the IDA study, these estimates will be used to guide selection of anti-hypertensive  
44  
45 treatment in order to obtain better blood pressure control and to reduce side-effects.  
46  
47  
48

#### 49 50 *The importance of individualized lifestyle changes*

51  
52 Lifestyle changes are the first-choice treatment for patients with newly diagnosed T2D. However, such  
53  
54 changes are often difficult to implement and also costly, if they need to be supervised. Promoting  
55  
56 individualized lifestyle changes will be an important part of this study. Our aim is to provide evidence-based  
57  
58  
59  
60

1  
2  
3  
4 lifestyle interventions that are feasible to implement on an everyday basis. We hope to empower patients  
5  
6 to implement changes in their everyday life via face-to-face consultations and novel individualized  
7  
8 supportive E-health solutions. We plan to identify and describe patients who will benefit clinically from the  
9  
10 E-health solutions being offered and to use this knowledge for large-scale implementation of individualized  
11  
12 E-health technology in daily clinical practice.

### 13 14 15 16 *The importance of multifactorial management of type 2 diabetes*

17  
18 The Steno 2 study underlined the importance of multifactorial intervention in type 2 diabetes with a  
19  
20 marked and durable reduction in morbidity and mortality associated with multifactorial intervention[1]. A  
21  
22 multifactorial approach is also emphasized in the current diabetes guidelines [16 25]. In the current study  
23  
24 we therefore aim to develop specific individualized approaches to the various components of a  
25  
26 multifactorial intervention.  
27  
28

### 29 30 31 *The importance of diabetes management in general practice*

32  
33 Primary health care providers have an integrated knowledge of the medical history, social status, and  
34  
35 family relationships of their patients, together with a general knowledge of treatment. “The Individualized  
36  
37 treatment of newly clinical diagnosed T2D in general practice study” (IDA) is designed to integrate specialist  
38  
39 knowledge and examinations into the treatment of patients in primary care. Endocrinological assessment  
40  
41 of pathophysiological phenotypes will form the basis for individual treatment algorithms, made readily  
42  
43 available to primary health care providers.  
44  
45

## 46 47 **HYPOTHESIS**

48  
49 We hypothesize that individualized treatment based on pathophysiological traits and a new guidance  
50  
51 strategy will improve glycemic and blood pressure regulation and reduce complications in clinically  
52  
53 diagnosed T2D patients, compared with outcomes under current guidelines. We hypothesize that  
54  
55 individualized treatment will reduce side-effects and polypharmacy, thereby improving patient compliance  
56  
57  
58  
59  
60



1  
2  
3  
4 and quality of life. Furthermore, we hypothesize that an individually tailored approach has the potential to  
5  
6 improve the cost-benefit ratio of T2D treatment.  
7  
8

## 9 **AIM**

10  
11 The study's aim is to investigate the effect of a new treatment concept for patients with T2D based on  
12  
13 personalized treatment in general practice supervised by specialists. Treatment goals, lifestyle  
14  
15 interventions, and pharmacological treatment will be individualized. Medication choices will be based on  
16  
17 pathophysiological measurements of possible underlying causes of hyperglycaemia and hypertension in  
18  
19 individual patients.  
20  
21  
22

## 23 **OBJECTIVES**

24  
25 The primary objective of the study is to assess the effect of individualized, multifactorial, interactive, and  
26  
27 supervised treatment in patients with T2D, compared to treatment based on contemporary guidelines. The  
28  
29 composite clinical outcome measure will encompass all-cause mortality, micro- and macrovascular  
30  
31 complications, cancer, and hypoglycemia. Secondary objectives are to assess effects on individual clinical  
32  
33 outcomes, socioeconomic costs and quality of life.  
34  
35  
36  
37

## 38 **METHODS AND ANALYSIS**

### 39 **Setting and design**

40  
41  
42 The study is designed as a prospective controlled multicenter open-label study of a controlled intervention,  
43  
44 in the longitudinal DD2 cohort. Newly diagnosed T2D patients are enrolled prospectively in the population-  
45  
46 based DD2 cohort. At baseline, the DD2 project collects interview data and biobanks blood and urine  
47  
48 samples [26 27]. Following enrolment, each participant is followed over time using data in nationwide  
49  
50 registries [28]. This study is one of several planned studies drawing on the cohort [29].  
51  
52  
53  
54  
55  
56  
57  
58  
59  
60

1  
2  
3  
4 The study setting will be community-based. Patients in the intervention group will be recruited and treated  
5  
6 by their general practitioners (GPs). Patients in the control group will be passive study participants,  
7  
8 followed longitudinally using information from the DD2 cohort and biobank and linked longitudinal to  
9  
10 national registries. Patients in the intervention group will be recruited over 3 years, with clinical  
11  
12 examinations at baseline and after 2, 4 and 10 years. The project timeline is shown in Figure 1.  
13

14  
15  
16 The project builds on the concept of shared care, where specialist knowledge is expanded into the primary  
17  
18 care sector. For GPs participating in the study, specialist input will be available by phone during the day and  
19  
20 also delivered electronically to each patient's electronic health record (EHR).  
21

## 22 **Patients and Recruitment**

23  
24  
25  
26 A flowchart of GPs participating in DD2 and IDA is provided in Figure 2. Patients in the intervention group  
27  
28 will be recruited from GPs in the region of southern Denmark and the region of Zealand participating in  
29  
30 both the DD2 cohort and the IDA study. Patients in the control group will be recruited from GPs  
31  
32 participating in the DD2 cohort but not in the IDA study. The selection process for patients in the two  
33  
34 groups will be different and adjustment for differences in prognostic factors at baseline is therefore  
35  
36 warranted as described in the statistical section.  
37

### 38 *Intervention patients*

39  
40  
41  
42 A flowchart of recruitment is provided in Figure 3. Participating IDA GPs will be responsible for the initial  
43  
44 patient contact, including collection of brief general patient information. If a DD2 patient is interested in  
45  
46 the study, the GP automatically will register the patient in the DD2 website, triggering contact by a study  
47  
48 nurse who will give the patient detailed study information. This will occur either by phone or during an  
49  
50 initial informational meeting. Collection of in-depth patient information, informed consent, and additional  
51  
52 screening will take place at central study hospitals prior to the baseline examination.  
53  
54

55  
56 The following patient inclusion criteria will be used:  
57  
58  
59  
60

- 1
- 2
- 3
- 4 1. Member of the DD2 cohort [30]
- 5
- 6 2. Patient at a GP participating in the IDA study
- 7
- 8 3. Not diagnosed with Type 1 Diabetes, defined as age <30 years, fasting C-peptide<300pM, and
- 9 Gad65-ab>20IU/ml (see below)
- 10
- 11
- 12 4. Life expectancy above 2 years
- 13
- 14 5. No participation in other clinical trials
- 15
- 16 6. Willing to provide written informed consent
- 17
- 18
- 19

#### 20 *Control patients*

21  
22 Patients for the control group will be recruited from DD2 clinics throughout Denmark not participating in  
23 the IDA study (Figure 2). Availability of valid biobanked samples for measuring GAD-ab, P-glucose, and C-  
24 peptide will be required to join the control group. As the control group will be created within DD2, neither  
25 GP nor patient will be informed, ensuring that the control group is truly blinded.  
26  
27  
28  
29  
30  
31

#### 32 **Patient examination before intervention**

33  
34  
35 *Screening* will take place at the following four central study sites: Odense University Hospital, Hospital of  
36 Southwest Denmark, Næstved Lægecenter, and Holbæk Hospital. A written informed consent will be signed  
37 at the baseline visit prior to initiating examination of study participants.  
38  
39  
40  
41

42 *Phenotype evaluation* will be performed at the central sites at baseline and after 24 and 48 months.

43 Medical history, medication use, and measures used in the phenotype evaluation will be obtained from the  
44 patient. Fasting plasma glucose, GAD65-antibody, and fasting C-peptide will be ascertained from the DD2  
45 database. Repeat measures of cardiac impedance and unobserved automated blood pressure will be taken  
46 at the central sites at the following time points, determined by prior blood pressure values:  
47  
48  
49  
50  
51  
52

- 53
- 54 1)  $BP \leq 135/85$ : impedance measurement repeated after 24 months,
- 55
- 56 2)  $135/85 < BP \leq 145/95$ : impedance measurement repeated after 12 and 24 months,
- 57
- 58
- 59
- 60

1  
2  
3  
4 3) BP>145/95: impedance measurement repeated after 6, 12 and 24 months.  
5  
6

7 The results of the phenotype evaluation will be assessed at Odense University Hospital and the results sent  
8  
9 to the patient's general practitioner via the electronic health record.  
10

11 *Treatment and implementation of the phenotype evaluation* will take place at the GP's office every third  
12  
13 month or at the discretion of the GP. The GP will measure HbA1c, the lipid profile, the albumin creatinine-  
14  
15 ratio, creatinine, and BMI annually.  
16  
17

#### 18 19 20 21 22 Daily physical activity 23

24 To measure daily physical activity level, a Axivity AX3 accelerometer (Axivity, Newcastle, UK) will be taped  
25  
26 on the thigh and on the lower back. The AX3 is a 11g and 23x32.5x7.6 mm weatherproof accelerometer  
27  
28 with a 512MB internal memory and clock. Accelerometers will be fixed directly on the skin using  
29  
30 waterproof taping. Subjects will be instructed to wear the accelerometers at all times (including water  
31  
32 activities and sleep) during a 10-day period and additional tape will be provided to patients at examination.  
33  
34 The accelerometer on the back will be placed on the right side, above the upper point of the posterior iliac  
35  
36 crest and next to the spine with its positive x-axis pointing downward and its negative z-axis pointing  
37  
38 forward. The accelerometer on the thigh will be placed on the medial front of the right thigh, midway  
39  
40 between the hip and knee joints, with its positive x-axis pointing downward and its negative z-axis pointing  
41  
42 forward[31]. A sampling rate of 50 Hz will be used and data stored in in the original cwa Axivity file format,  
43  
44 but also converted into a binary gt3x compatible file format using a custom made add-on to OmGui Axivity  
45  
46 software.  
47  
48  
49  
50

#### 51 52 Cardiovascular surrogate markers 53 54 55 56 57 58 59 60

1  
2  
3  
4 Patients with clinically diagnosed T2D within 2 years of their baseline examination will be invited to  
5  
6 participate in additional evaluation of the following cardiovascular surrogate markers:  
7  
8

9  
10 1) *24-hour ambulatory blood pressure monitoring (24ABPM)*

11 24ABPM will be implemented by means of brachial oscillometric measurements, using the Mobil-O-  
12 Graph® system (IEM GmbH, Stolberg, Germany). The device will be set to measure BP every 15  
13 minutes during the day (0700-2300 hours) and every 30 minutes during the night (2300-0700  
14 hours). The patient will be instructed to record when s/he went to bed and got up.  
15  
16  
17  
18  
19

20  
21  
22 2) *Skin auto fluorescence (SAF) to evaluate advanced glycosolated end-products*

23 SAF will be measured using the AGE Reader™ (DiagnOptics Technologies BV, Groningen, the  
24 Netherlands). Technical details of this non-invasive device have previously been described in  
25 detail,[32].  
26  
27  
28  
29  
30

31  
32  
33 3) *Low-dose non-contrast CT scan to detect coronary artery calcification*

34 The atherosclerotic plaque burden in the coronary, carotide, aortic, and femoral arteries will be  
35 estimated by measuring calcium during a 64-slice CT scan (Discovery VCT; GE Healthcare,  
36 Milwaukee, WI, USA) conducted at Odense University Hospital. The scan will be performed with the  
37 following parameters: gantry rotation time 500 ms, 16 · 2.5mm collimation, 120 kV tube voltage,  
38 200 mA tube current and a prospectively EGC-triggered scan acquisition gating at 50% of the R-R  
39 interval. Scan data will be acquired during an inspiratory breath hold. The CAC Agatston score is  
40 computed by summing the CAC scores of all foci in the epicardial coronary system.  
41  
42  
43  
44  
45  
46  
47  
48  
49  
50

51  
52  
53 4) *Ultrasound of the carotid arteries to evaluate intima media thickness (IMT) and plaques*  
54  
55  
56  
57  
58  
59  
60

1  
2  
3  
4 IMT will be measured by B-mode ultrasound (Model IE33, Koninklijke Philips Electronics N.V,  
5  
6 Eindhoven, The Netherlands), using a linear array transducer (L11-3 with a frequency up to 11  
7  
8 MHz), with acquisition of multi-insonation angles for subsequent analysis with automated  
9  
10 edge detection software according to current guidelines,[33].  
11  
12  
13

14  
15 5) *ECG for approximation of left ventricular hypertrophy*  
16

17 ECG will be measured digitally (EC Sense Lexor, Cardiolex AB, Solna, Sweden). The following  
18  
19 measures of LVH will be calculated:  
20

- 21  
22 - Cornell voltage-duration product, defined as the sum of voltage of SV3 and RaVL multiplied by QRS  
23  
24 duration (in women 0.6mV is added to the voltage)  
25  
26 - Sokolow-lyon voltage, defined as the sum of SV1 and R in V5 or V6, depending on which is larger.  
27  
28  
29

30  
31 6) *Fundus photo to evaluate retinal vascular changes*  
32

33 Retinal vascular changes will be assessed through retinal imaging. Two methods will be employed  
34  
35 to assess diabetic retinopathy and vascular damage:  
36

- 37  
38 - Diabetic retinopathy will be graded using the Early Treatment of Diabetic Retinopathy Study  
39  
40 (ETDRS) classification,[34]. Grading is performed in 7 standard fields. The assessed characteristics  
41  
42 are graded in specific fields and/or multiple fields. The grading encompasses the following  
43  
44 characteristics: microaneurysm, hemorrhages, hard exudates, soft exudates, intraretinal  
45  
46 microvascular abnormalities, venous abnormalities, new vessels on disc or elsewhere, preretinal  
47  
48 hemorrhage, vitreous hemorrhage, scars of prior photocoagulation, and clinically significant  
49  
50 macular edema.  
51  
52 - The retinal arteriolar and venular caliber as described by Hubbard *et al.*[35] All venules and  
53  
54 arterioles in the area half to one disc diameter from the disc margin of the diameter are measured  
55  
56  
57  
58  
59  
60

1  
2  
3  
4 and an averaged measure is derived. The ratio of the venular and arteriolar diameters also is  
5  
6 derived.

- 7  
8 - Retinal photos will be taken after dilation of both eyes with 1 drop 10% metaoxedrin and mydriacyl  
9  
10 5mg/ml. After 10 min this will be repeated. After a total of 20 minutes, six pictures will be taken of  
11  
12 each eye.

13  
14 All photographs will be assessed for retinopathy locally as part of the patients' regular screening.

15  
16 Trained ophthalmologists at the Department of Ophthalmology, Odense University Hospital then  
17  
18 will assess retinopathy with the methods described above.  
19

20  
21 Surrogate marker evaluation will take place at baseline and again at two and four years follow-up.  
22

### 23 24 **Study interventions**

25  
26 Patients in the control group will not receive study-related interventions, but rather will be treated by their  
27  
28 GP according to national guidelines. Patients in the intervention group will receive multifactorial  
29  
30 individualized treatment as outlined below.  
31  
32

#### 33 34 Anti-diabetic treatment based on pathophysiological phenotypes

35  
36 Pathophysiological phenotyping will provide the basis for individually guided treatment. At inclusion  
37  
38 patients with "other specific forms of diabetes" will be identified. The remaining classical WHO-defined T2D  
39  
40 patients will be characterized according to their insulin sensitivity (IS) and beta cell function (BCF).  
41  
42

43  
44 Other specific types of diabetes are defined as follows:  
45

- 46  
47 1) Maturity-onset diabetes of the young (MODY). Patients will be screened for 10 monogenic causes  
48  
49 of diabetes.  
50  
51 2) Late autoimmune diabetes of the adult (LADA). Defined as GAD65-ab $\geq$ 20 IU/ml.  
52  
53 3) Secondary diabetes. Defined as low BCF (HOMA2-beta < 115.3%) and a history of pancreatitis or  
54  
55 pancreas resection.  
56  
57  
58  
59  
60

- 1  
2  
3  
4 4) Steroid-associated diabetes, defined as use of oral glucocorticosteroids within 3 months of  
5  
6 diabetes diagnosis. Genuine-steroid induced diabetes is present when it is known with certainty  
7  
8 that diabetes was not present in the 3 months prior to steroid initiation. Patients with known prior  
9  
10 T2D or with uncertainty about the timing of diabetes onset and steroid use will be allocated to one  
11  
12 of the additional phenotypes described below.  
13

14  
15  
16 Genuine WHO-defined T2D:

- 17  
18 5) Insulinopenic type 2 diabetes. Defined as low BCF (HOMA2-beta < 115.3%) and high IS (HOMA2-S ≥  
19  
20 63.5 %)  
21  
22 6) Classical type 2 diabetes. Defined as low BCF (HOMA2-beta < 115.3%) and low IS (HOMA2-S < 63.5  
23  
24 %)  
25  
26 7) Hyperinsulinemic type 2 diabetes. Defined as high BCF (HOMA2-beta ≥ 115.3%) and low IS (HOMA2-  
27  
28 S < 63.5 %)  
29  
30  
31

32 The classification is hierarchical. The phenotypes have been described previously [20]. BCF and IS will be  
33  
34 assessed using the HOMA2 model, calculated based upon fasting C-peptide and fasting plasma glucose.  
35  
36 HOMA2-beta is an estimate of the beta-cell function and HOMA2-S is an estimate of the IS. In a healthy  
37  
38 population without diabetes or impaired glucose tolerance, median HOMA2-beta was found to be 115.3%  
39  
40 and median HOMA2-S was 63.5%. In the study population, values of HOMA2-beta or HOMA2-S above these  
41  
42 medians will be defined as “high”, while values below the median will be defined as “low”.  
43  
44  
45

46 Proposed treatment strategies in the study according to diabetes phenotypes are as follows:  
47  
48

- 49 1) MODY. (A) Types 1 and 3 MODY should be treated with glimepiride or repaglinid. (B) Type 2 MODY  
50  
51 should be treated with diet. Secondarily, basal insulin can be used. (C) Type 5 MODY should be  
52  
53 treated with basal insulin. (D) Rare types of MODY should be treated individually according to  
54  
55 specialist assessment.  
56  
57  
58  
59  
60



## 2) LADA.

*In patients who have IS and BCF equivalent to insulinopenic and classic T2D:*

A) Metformin if BMI>25 kg/m<sup>2</sup>. B) Basal insulin and meal-time insulin.

*In patients who have IS and BCF equivalent to hyperinsulinemic T2D:*

Treatment equivalent to hyperinsulinemic T2D (see below), with additional information on risk of rapid BCF deterioration and possible absolute need for insulin therapy.

## 3) Secondary diabetes. Basal and meal-time insulin.

## 4) Steroid associated diabetes. A) Meal-time insulin. B) Metformin. C) Basal insulin if fasting blood glucose is above 7.0.

## 5) Insulinopenic type 2 diabetes. A) Metformin. B) Basal insulin. 3) Meal-time insulin.

## 6) Classical type 2 diabetes.

*In patients without CVD:* 1) Metformin. 2) GLP-1 analogue\*. 3) Basal insulin. 4) Meal-time insulin.

*In patients with former CVD:* 1) Metformin. 2) SGLT-2 inhibitor. 3) GLP-1 analogue\*. 4) Basal insulin.

5) Meal-time insulin.

7) Hyperinsulinemic type 2 diabetes. In patients with BMI>35 kg/m<sup>2</sup>, gastric bypass should be considered according to current national criteria and patient preference. Pharmacological treatment:

*In patients without CVD:* A) Metformin. B) GLP-1 analogue\*. C) Pioglitazone. D) Basal insulin. E) Meal-time insulin.

*In patients with former CVD:* A) Metformin. B) SGLT-2 inhibitor. C) GLP-1 analogue\*. D) Pioglitazone. E) Basal insulin. F) Meal-time insulin.

Pioglitazone is not recommended for patients with heart failure or known osteoporosis.

\*DDP-4 inhibitors can be used if the patient does not want a GLP-1 analogue. It is recommended that a DDP-4 inhibitor be discontinued if insulin is initiated.

1  
2  
3  
4 Type of drug within drug classes, dosing, and titration will be chosen at the discretion of the treating  
5  
6 physician. Suggestive algorithms will be available to the physicians.  
7  
8

9 Treatment of hyperglycemia will proceed according to the following individual goals:  
10

- 11 1) Optimal control of HbA1c < 48 mmol/mol;
- 12 2) Acceptable control of HbA1c < 58 mmol/mol; or
- 13 3) Free of symptoms, with best possible HbA1c achieved within this constraint.  
14  
15  
16  
17  
18

19 All treatment algorithms will be applied according to these predetermined goals. GPs will be free to choose  
20 the goal applicable to an individual patient. In patients with neuropathy or pre-existing cardiovascular  
21 disease, careful goal assessment is needed. If a patient has a severe hypoglycemic event, has repeated  
22 measures of blood glucose below 4.0 mmol/l, or is therapy resistant, the goal should be reassessed. For an  
23 in-depth discussion of the motivation for the glucose-lowering algorithm we refer to the supplemental  
24 material.  
25  
26  
27  
28  
29  
30  
31  
32

### 33 Anti-hypertensive treatment 34

35  
36 Treatment of hypertension will be guided by measurements of thoracic impedance, which provide  
37 estimates of vascular resistance, intravascular volume, and cardiac inotropy. These measurements will be  
38 used to guide the pharmacological treatment of arterial hypertension. Principles of drug class choice will be  
39 as follows:  
40  
41  
42  
43  
44

- 45 1) When hypertension or microalbuminuria are present, patients should be treated with an ace-  
46 inhibitor (or a angiotensin-2-antagonist), regardless of the result of the impedance measurement.  
47  
48
- 49 2) High vascular resistance, as the only abnormal impedance measure, should be treated with a  
50 calcium-channel antagonist (dihydropyridins) (CCBs) in addition to an ace-inhibitor.  
51  
52  
53  
54  
55  
56  
57  
58  
59  
60

- 3) High intravascular volume, as the only abnormal impedance measure, should be treated with a thiazide in addition to current anti-hypertensive treatment. If the patient already is receiving a thiazide in maximum dose, an aldosterone receptor antagonist should be added.
- 4) In cases of high vascular resistance and high intravascular volume (more than double the vascular resistance in relative terms), diuretics (thiazide or secondarily aldosterone receptor antagonist) should be increased, comparable to the maximum dose of one new drug. As a next step, a CCB should be added. Finally, an aldosterone receptor antagonist should be increased to its maximum dose.
- 5) In cases of high vascular resistance and high intravascular volume (but less than double the vascular resistance in relative terms), an ACE inhibitor or CCB should be added, depending on initial treatment. As a second measure, diuretics (thiazide or, less often, an aldosterone receptor antagonist) should be increased comparable to the maximum dose of one new drug. As a third measure, CCB should be titrated to its maximum dose. Finally, an aldosterone receptor antagonist can be increased to its maximum dose.
- 6) High inotropy is addressed only when the patient receives an ACE-inhibitor, thiazide, and CCB and the impedance measurement is made while the patient is receiving this treatment. Other abnormalities need to be addressed first. Carvedilol up to 50mg is recommended.

The maximum dose of bendroflumethiazide is considered to be 5.0 mg, that for hydrochlorothiazide is 50 mg, and that for spironolactone is 50 mg. In cases in which the eGFR is below 30 mL/min/1.73m<sup>2</sup>, high ceiling diuretics are substituted for thiazides. Non-hypertensive indications for anti-hypertensive medication overrule this algorithm.

Impedance measurements also are used to downgrade anti-hypertensive treatment, in the following situations:

- 1) When inotropy is decreased, beta-blockers are terminated, or the dose reduced.

- 2) When hypovolemia is present, diuretics are terminated or the dose reduced.
- 3) When inotropy is decreased, vascular resistance is normal, and blood pressure is regulated, CCBs can be reduced or terminated.

For patients with macroalbuminuria, the goal of anti-hypertensive treatment will be to achieve a blood pressure <130/80 on 3 drugs, measured as home blood pressure or with an automated blood pressure device. For other patients, the goal is blood pressure <135/80 on 3 drugs. In cases in which control of blood pressure is not achieved with 3 anti-hypertensive drugs, the patient will be referred to a specialist clinic. Blood pressure below 120/70 should be avoided, if necessary by means of down-titration, unless other considerations are present.

Hypertension at study inclusion will be defined by presence of anti-hypertensive treatment or a blood pressure measurement above or equal to 135/80 in the office under standardized conditions using an automated blood pressure device (Mobilograf).

#### Treatment of dyslipidemia

Treatment with atorvastatin or simvastatin 40mg will be recommended for all patients, regardless of LDL-C. If the treatment goal is not met, atorvastatin 80 mg or rosuvastatin 40 mg will be recommended. Combining lipid-lowering drugs will not be recommended. The treatment goal will be LDL cholesterol  $\leq 2.5$ mM and LDL cholesterol  $\leq 2.0$ mM in patients with established cardiovascular disease.

#### Termination of inefficient medication

The effect of a specific anti-diabetic, antihypertensive, or cholesterol-lowering treatment will be measured. The following efficacy requirements after titration to the full tolerable dose will need to be met:

- 1) Decline in Hba1c exceeding 0.5 % within 3 months.
- 2) Decline in systolic blood pressure exceeding 5 mmHg within 1 month.

1  
2  
3  
4 3) Decline in LDL-cholesterol exceeding 0.5 mM within 1 month.  
5  
6

7 If the target is not met, the specific treatment should be terminated and replaced by another drug  
8  
9 according to the algorithm. The missing effect on blood pressure should be validated by home blood  
10  
11 pressure measurements according to national guidelines. For anti-hypertensive medication, another drug  
12  
13 within the same class can be tried.  
14

#### 15 16 Lifestyle interventions 17

18  
19 Supportive individualized M-health initiatives and face-to-face consultations for promoting changes in  
20  
21 lifestyle will be used in this study. The aim is to empower patients to achieve sustainable reductions in  
22  
23 carbohydrate intake and increase the daily physical activity level.  
24

25  
26 In the current study, we will integrate dietician-supported self-management by using a commercially  
27  
28 Internet platform (Liva) to facilitate interactive communication between dietitians and users, as well as by  
29  
30 peer-to-peer support. The platform will be further developed to support individualized education, goal  
31  
32 setting and evaluation of diet and exercise behavior as described below. In addition, interactive  
33  
34 communication between patient and a personal healthcare professional will allow for asynchronous  
35  
36 contact when needed, in the form of video, text, or spoken messages. The advanced interactive platforms  
37  
38 will be supported further by an individualized number of face-to-face consultations between the patient  
39  
40 and the personal healthcare professional, with whom the patient will be acquainted from the interactive  
41  
42 platform.  
43  
44

45  
46 The current study aims to empower patients to decrease the amount of carbohydrates in their diet (40E%  
47  
48 fat, 40E% carbohydrates, and 20E% proteins), while keeping energy intake unchanged or slightly decreased  
49  
50 in cases in which the patient seeks weight reduction. We will support individualized changes towards a  
51  
52 sustainable increased number of low-carb meals each week. To support these changes, we have designed  
53  
54 an Internet and smartphone platform ([www.dd2mad.dk](http://www.dd2mad.dk)) that easily allows individuals to plan, purchase  
55  
56  
57  
58  
59  
60

1  
2  
3  
4 groceries, and cook low-carb meals for all daily meals, including snacks. A dietician developed the recipes,  
5  
6 and the macro-nutritional composition of each recipe has been calculated using “DANKOST” software  
7  
8 (Dankost Aps, Copenhagen, DK). The platform is updated monthly with new recipes and will be developed  
9  
10 further using a user-driven iterative process. We will implement this platform in the modified Liva.  
11

12  
13 We aim to empower patients to make a sustainable increase in physical activity level by implementing  
14  
15 interval walking. To enable the patients to engage in and maintain correct individualized interval walking  
16  
17 we have developed a smartphone application (InterWalk). The application is designed to individually guide  
18  
19 duration and intensity of the training in real time based on a small test at the first use of the application.  
20  
21 During use, the app automatically monitors exercise intensity, training duration, and walking distance.  
22  
23 Following each training session, the app sends the data to a central server[36]. The training data will be  
24  
25 available for the patient and the healthcare professionals making it possible to provide evidence-based  
26  
27 training feedback to patients, using physical fitness data[37], training duration, and compliance from the  
28  
29 App[36]. The InterWalk App will be implemented in the Liva platform. For a discussion of the motivation of  
30  
31 the lifestyle intervention see the supplemental material.  
32  
33  
34  
35

### 36 **Outcomes**

37  
38 The study’s primary outcome measure is time to a composite outcome of all-cause mortality, non-fatal  
39  
40 myocardial infarction, coronary revascularization, cardiac arrest with resuscitation, hospitalization for heart  
41  
42 failure, non-fatal stroke, development or progression of nephropathy or retinopathy (see below), severe  
43  
44 hypoglycemia leading to hospitalization, and development of cancer. Development or progression of  
45  
46 nephropathy is defined as renal failure (defined by the need for chronic dialysis), development of  
47  
48 macroalbuminuria, or doubling of baseline s-creatinine to a level above 200uM. Development of  
49  
50 retinopathy is defined as proliferative retinopathy or macular edema that requires laser therapy or  
51  
52 vitrectomy, or diabetes-related blindness (Snellen visual acuity below 0.1). Information on deaths will be  
53  
54 obtained from the Civil Registration System. Individual diagnoses, operations, and procedure codes will be  
55  
56  
57  
58  
59  
60

1  
2  
3  
4 obtained from the Danish National Patient Registry (See Table 1). S-creatinine values and albumin-  
5  
6 creatinine-ratios will be obtained through the Danish Diabetes Database for Adults.  
7  
8

9  
10 Secondary outcome measures are all-cause mortality, socioeconomic costs, and quality of life. Quality of  
11  
12 life will be assessed with SF-12 and Q-5 questionnaires at study inclusion and after 2 and 4 years.  
13

14 Tertiary outcome measures are the individual endpoints in the composite endpoint. Other endpoints are  
15

- 16
- 17 1) time to fatal acute myocardial infarction
- 18
- 19 2) time to fatal stroke
- 20
- 21 3) time to lower-limb amputation
- 22
- 23 4) time to other revascularization procedures and peripheral thrombosis (not cardiac or
- 24
- 25 cerebrovascular events)
- 26
- 27
- 28 5) Overall hospitalizations per 1000 patient-years
- 29
- 30 6) Treatment adherence, defined as reimbursement of prescriptions, compared to intended
- 31
- 32 treatment dose
- 33
- 34 7) Time trends of HbA1c, blood pressure, and LDL cholesterol
- 35
- 36 8) Individual time trends of daily physical activity
- 37
- 38

39  
40 Cause of death will be obtained from the Danish Cause of Death Register. Reimbursement of prescriptions  
41  
42 will be ascertained through the Danish National Prescription Registry. Intended treatment dose will be  
43  
44 obtained through the electronic medicine chart "FMK".  
45

#### 46 47 **Power calculations**

48  
49  
50 The power calculation was performed using Lakatos normal approximation for a log-rank test of two  
51  
52 survival curves. The estimated sample size of 1123 patients will have 80% power to detect a reduction of  
53  
54 20% of the incidence rate of the primary endpoint, with a type 1 error of 5%, during 10 years of follow-up.  
55

56 A composite yearly event rate of 5% is estimated, based on estimated incidence rates of 2.5% per year of  
57  
58  
59  
60

1  
2  
3  
4 macro- and microvascular complications, 1.5% per year for cancer, and approximately 1% for overall  
5  
6 mortality. The hypoglycemic event rate is expected to be less than 0.4%. Due to the database approach,  
7  
8 loss to follow-up should be minimal.  
9

### 10 11 **Statistical analysis**

12  
13  
14 The advantage of our pragmatic study approach is that our results will reflect effectiveness, harms and  
15  
16 costs of individualized treatment in daily practice in primary care, improving generalizability compared to  
17  
18 single-exposure RCTs typically conducted among heavily selected patient and clinic populations. On the  
19  
20 other hand, GP practices and their patients are self-selected to participating in the IDA intervention in our  
21  
22 study, and will be non-blinded to receiving this treatment. The main methodological challenge for our  
23  
24 proposed study will therefore be to address possible confounding caused by imbalance of prognostic  
25  
26 factors in participants versus controls. We will use appropriate statistical methods for dealing with  
27  
28 confounding, including regression analyses and propensity score matching.  
29  
30  
31

### 32 **Confounders**

33  
34 Covariates expected to be confounders will be selected according to available evidence and knowledge,  
35  
36 and will include the following:  
37

- 38 1) *General variables*: Age, gender, diabetes onset, DD2 enrollment year, time from DD2 enrollment to  
39  
40 IDA study entry, GP and place of residence (municipality)
- 41  
42 2) *Lifestyle variables*: Smoking, alcohol consumption, physical exercise (self-reported and  
43  
44 accelerometer measurements)
- 45  
46 3) *Comorbidity*: Each of the individual strata of the Charlson Comorbidity Index, except diabetes,  
47  
48 hospitalization for hypoglycemia, chronic dialysis, laser treatment of retinopathy/maculopathy,  
49  
50 vitrectomy, chronic heart disease, angina pectoris, any revascularization procedure, lower-  
51  
52 extremity amputation, atrial fibrillation and history of psychiatric disease (8 covariates defined by  
53  
54 ICD-10: DF1 to DF8)  
55  
56  
57  
58  
59  
60



- 1
- 2
- 3
- 4 4) *Socioeconomic variables*: Education, employment, income, social support
- 5
- 6 5) *Clinical variables*: Blood pressure, BMI, waist circumference, LDL-C, HDL-C, triglyceride level,
- 7
- 8 creatinine level, urine albumin creatinine ratio, diabetes phenotype
- 9
- 10 6) *Medication use*: Aspirin, statins, anti-coagulating drugs, thiazides, ACE-inhibitors or angiotensin 2
- 11
- 12 antagonists, calcium channel antagonists, beta-blockers, potassium-sparing diuretics, metformin,
- 13
- 14 sulfonyleurea, DD4-inhibitors, GLP-1 analogues, SGLT-2 inhibitors, insulin, oral corticosteroids, and
- 15
- 16 number of redeemed drugs (including the above drugs)
- 17
- 18
- 19
- 20

21 Ascertainment of confounder variables will be through the DD2 cohort and registries. Comorbidity is  
22 defined as all diagnoses registered from 1977 until enrollment. Socioeconomic variables are defined as the  
23 values recorded in the enrollment year. Medication use is defined as redeemed prescriptions 1 year prior to  
24 enrollment. Clinical variables are defined by the value measured closest to enrollment, no more than 1 year  
25 prior to enrollment and 1 month after enrollment.  
26  
27  
28  
29  
30  
31  
32  
33

#### 34 **Cox regression analysis**

35  
36 Follow up will extend for 10 years from the date of IDA intervention start until first of any of the individual  
37 composite outcome events, emigration out of Denmark, or end of study 1.January 2018, whichever comes  
38 first. For patients in the control group the entry date will be the date of DD2 enrollment or date of the  
39 overall IDA study initiation 1.January 2015, whichever comes last. We will construct survival curves for  
40 intervention and control patients and compute cumulative incidence rates. We then compute incidence  
41 rate ratios (IRRs) with 95% confidence intervals (CIs) for intervention patients compared with controls using  
42 Cox regression analysis and controlling for confounders described above. Stratified analyses will be  
43 performed by gender, age below/above 60 years, eGFR below/above 60, former CVD, and diabetes  
44 phenotype with test for interaction.,.  
45  
46  
47  
48  
49  
50  
51  
52  
53  
54  
55  
56  
57  
58  
59  
60

### Propensity score analysis

In a second analysis, we will use propensity score matching. For this analysis, we will compute the probability of each DD2 cohort non-IDA-intervention patient being included in the IDA intervention arm in a logistic regression analysis, conditioned on the patient's covariate profile. Next, we will match each intervention patient to a DD2 control patient with the closest propensity score in a 1:3 fashion and eliminate the remaining controls. The matching will be performed in a random sequential order. After determining that the covariates are balanced, between the two treatment groups (see supplemental material), we will conduct a matched Cox regression analysis without further adjustment. If any covariate is not balanced a model with adjustment for non-balanced covariates will be made. The assumption of proportional hazards in the Cox models will be assessed graphically.

### ETHICS AND DISSEMINATION

The study will use well-known pharmacological agents and bariatric interventions. Thus the safety of the patients is considered high. Patients in the intervention group will provide written informed consent before participation. The study will be conducted in compliance with the principles set forth in the Declaration of Helsinki and the Good Clinical Practice (GCP) Guidelines. The study has been approved by the Regional Committee on Medical Health Ethics (Region of Southern Denmark S-20120186), the Danish Data Protection Agency, and the Danish Health and Medicines Authority (journal nr. 2012120204).

All subjects will be identified by an unambiguous subject code that can be linked to the civil registration number. The subject code will be used as a pseudo-anonymization code throughout the study. Handwritten source data (CRFs) or hard-copy source data will be securely safeguarded against unauthorized access and kept under lock, with access only by authorized persons. Electronically reported source data will conform to good clinical practice standards by using the RedCap data collection system and the DD2-established data

1  
2  
3  
4 collection system. Both systems have a high level of security and use data verification and detailed logging  
5  
6 during reporting.  
7

8  
9 Most study data will be stored in OPEN – a custom-designed study database secured against unauthorized  
10  
11 access. OPEN is a research service provided by the University of Southern Denmark that enables  
12  
13 researchers to store research data in accordance with national legislation and requirements for data  
14  
15 logging, password security, and backup.  
16

17  
18 Study results will be made public via articles in national and international peer-reviewed journals, which  
19  
20 will be accessible at [www.dd2.nu](http://www.dd2.nu). Positive, negative, and inconclusive results will be published according to  
21  
22 the Vancouver Principles. The results will be disseminated through [www.clinicaltrials.com](http://www.clinicaltrials.com) and the Danish  
23  
24 Diabetes Association.  
25

## 26 27 28 **PERSPECTIVES** 29

30  
31 IDA is one of the first studies to formalize a specific implementation of individualized medicine in treating  
32  
33 T2D. The ultimate goal is to improve quality of life and reduce complications in T2D patients –in a manner  
34  
35 requiring less medication and fewer resources.  
36  
37  
38  
39  
40  
41  
42  
43  
44  
45  
46  
47  
48  
49  
50  
51  
52  
53  
54  
55  
56  
57  
58  
59  
60

### Competing interests statement

JEH is a member of the MSD and Boehringer National Advisory board. HBN has received personal lectures fees from Novo Nordisk, outside the submitted work. MHO has received a clinical research grant from the Novo Nordisk Foundation. The Department of Clinical Epidemiology, Aarhus University Hospital, receives funding for other studies from companies in the form of research grants to (and administered by) Aarhus University. None of those studies have any relation to the present study. All other authors declare no competing interests.

### Funding statement

The study was supported by The Danish Agency for Science (grant nos. 09-067009 and 09-075724), the Region of Southern Denmark, the Region of Zealand, the Augustinus Foundation, the Herta Christensen' Foundation, the Novo Nordisk Foundation, the University of Southern Denmark. The biobank was supported by a unrestricted donation from Novo Nordisk A/S. Project partners are listed on the project website, <https://DD2.nu>. The study sponsors had no role in study design, data collection, data analysis, data interpretation, or writing of the report. The corresponding author had full access to all the data in the study and had final responsibility for the decision to submit for publication.

### Authors' contributions

The study concept was developed by HBN and JEH. HBN, JEH, MHO, JVS, JSN, TBO, RWT and SF designed the study. Principal Manager of the DD2 study is JSN. JVS drafted the article and JSN, RWT, HBN and MHO revised the draft. All authors participated in the critical revision of the intellectual content of the report.

### Reference list

1. Gæde P, Oellgaard J, Carstensen B, et al. Years of life gained by multifactorial intervention in patients with type 2 diabetes mellitus and microalbuminuria: 21 years follow-up on the Steno-2 randomised trial. *Diabetologia* 2016;1-10 doi: 10.1007/s00125-016-4065-6[published Online First: Epub Date]].
2. Gregg EW, Sattar N, Ali MK. The changing face of diabetes complications. *The Lancet. Diabetes & endocrinology* 2016;**4**(6):537-47 doi: 10.1016/s2213-8587(16)30010-9[published Online First: Epub Date]].
3. Færch K, Carstensen B, Almdal TP, Jørgensen ME. Improved Survival Among Patients With Complicated Type 2 Diabetes in Denmark: A Prospective Study (2002–2010). *The Journal of Clinical Endocrinology & Metabolism* 2014;**99**(4):E642-E46 doi: doi:10.1210/jc.2013-3210[published Online First: Epub Date]].
4. Coutinho M, Gerstein HC, Wang Y, Yusuf S. The relationship between glucose and incident cardiovascular events. A metaregression analysis of published data from 20 studies of 95,783 individuals followed for 12.4 years. *Diabetes care* 1999;**22**(2):233-40
5. Currie CJ, Peters JR, Tynan A, et al. Survival as a function of HbA(1c) in people with type 2 diabetes: a retrospective cohort study. *Lancet* 2010;**375**(9713):481-9 doi: 10.1016/S0140-6736(09)61969-3[published Online First: Epub Date]].
6. Gerstein HC, Miller ME, Byington RP, et al. Effects of intensive glucose lowering in type 2 diabetes. *The New England journal of medicine* 2008;**358**(24):2545-59 doi: 10.1056/NEJMoa0802743[published Online First: Epub Date]].
7. Patel A, MacMahon S, Chalmers J, et al. Intensive blood glucose control and vascular outcomes in patients with type 2 diabetes. *The New England journal of medicine* 2008;**358**(24):2560-72 doi: 10.1056/NEJMoa0802987[published Online First: Epub Date]].
8. Duckworth W, Abraira C, Moritz T, et al. Glucose control and vascular complications in veterans with type 2 diabetes. *The New England journal of medicine* 2009;**360**(2):129-39 doi: 10.1056/NEJMoa0808431[published Online First: Epub Date]].
9. Boussageon R, Bejan-Angoulvant T, Saadatian-Elahi M, et al. Effect of intensive glucose lowering treatment on all cause mortality, cardiovascular death, and microvascular events in type 2 diabetes: meta-analysis of randomised controlled trials. *BMJ* 2011;**343**:d4169 doi: 10.1136/bmj.d4169[published Online First: Epub Date]].
10. Seidu S, Achana FA, Gray LJ, Davies MJ, Khunti K. Effects of glucose-lowering and multifactorial interventions on cardiovascular and mortality outcomes: a meta-analysis of randomized control trials. *Diabetic medicine : a journal of the British Diabetic Association* 2016;**33**(3):280-9 doi: 10.1111/dme.12885[published Online First: Epub Date]].
11. Effect of intensive blood-glucose control with metformin on complications in overweight patients with type 2 diabetes (UKPDS 34). UK Prospective Diabetes Study (UKPDS) Group. *Lancet* 1998;**352**(9131):854-65
12. Intensive blood-glucose control with sulphonylureas or insulin compared with conventional treatment and risk of complications in patients with type 2 diabetes (UKPDS 33). UK Prospective Diabetes Study (UKPDS) Group. *Lancet* 1998;**352**(9131):837-53
13. Holman RR, Paul SK, Bethel MA, Matthews DR, Neil HA. 10-year follow-up of intensive glucose control in type 2 diabetes. *The New England journal of medicine* 2008;**359**(15):1577-89 doi: 10.1056/NEJMoa0806470[published Online First: Epub Date]].
14. Gerstein HC, Miller ME, Genuth S, et al. Long-term effects of intensive glucose lowering on cardiovascular outcomes. *The New England journal of medicine* 2011;**364**(9):818-28 doi: 10.1056/NEJMoa1006524[published Online First: Epub Date]].
15. Zoungas S, Patel A, Chalmers J, et al. Severe hypoglycemia and risks of vascular events and death. *The New England journal of medicine* 2010;**363**(15):1410-8 doi: 10.1056/NEJMoa1003795[published Online First: Epub Date]].
16. American Diabetes A. Standards of Medical Care in Diabetes 2017. *Diabetes Care*

2017;**40(Suppl. 1)**

17. Report of the expert committee on the diagnosis and classification of diabetes mellitus. *Diabetes care* 2003;**26 Suppl 1**:S5-20
18. Tuomi T, Santoro N, Caprio S, Cai M, Weng J, Groop L. The many faces of diabetes: a disease with increasing heterogeneity. *Lancet* 2014;**383**(9922):1084-94 doi: 10.1016/s0140-6736(13)62219-9[published Online First: Epub Date]].
19. Diagnosis and classification of diabetes mellitus. *Diabetes care* 2014;**37 Suppl 1**:S81-90 doi: 10.2337/dc14-S081[published Online First: Epub Date]].
20. Stidsen JV, Thomsen RW, Nielsen JS, et al. Pathophysiological Phenotypes of Clinically Diagnosed Type 2 Diabetes. Abstracts of the 74th Scientific Sessions of the American Diabetes Association, June 13-17, 2014, San Francisco, California. . *Diabetes* 2014;**63 Suppl 1**:A354-55
21. Stamler J, Vaccaro O, Neaton JD, Wentworth D. Diabetes, other risk factors, and 12-yr cardiovascular mortality for men screened in the Multiple Risk Factor Intervention Trial. *Diabetes care* 1993;**16**(2):434-44
22. Brunstrom M, Carlberg B. Effect of antihypertensive treatment at different blood pressure levels in patients with diabetes mellitus: systematic review and meta-analyses. *Bmj* 2016;**352**:i717 doi: 10.1136/bmj.i717[published Online First: Epub Date]].
23. Ferrario CM, Flack JM, Strobeck JE, Smits G, Peters C. Individualizing hypertension treatment with impedance cardiography: a meta-analysis of published trials. *Therapeutic advances in cardiovascular disease* 2010;**4**(1):5-16 doi: 10.1177/1753944709348236[published Online First: Epub Date]].
24. Fadl Elmula FE, Rebora P, Talvik A, et al. A randomized and controlled study of noninvasive hemodynamic monitoring as a guide to drug treatment of uncontrolled hypertensive patients. *Journal of hypertension* 2015;**33**(12):2534-45 doi: 10.1097/hjh.0000000000000749[published Online First: Epub Date]].
25. Global guideline for type 2 diabetes. *Diabetes research and clinical practice* 2014;**104**(1):1-52 doi: 10.1016/j.diabres.2012.10.001[published Online First: Epub Date]].
26. Steffensen C, Thomsen RW, Vaag A, et al. The Danish Centre for Strategic Research in Type 2 Diabetes (DD2) Project: rationale and planned nationwide studies of genetic predictors, physical exercise, and individualized pharmacological treatment. *Clinical epidemiology* 2012;**4**(Suppl 1):7-13 doi: 10.2147/clep.s30188[published Online First: Epub Date]].
27. Nielsen JS, Thomsen RW, Steffensen C, Christiansen JS. The Danish Centre for Strategic Research in Type 2 Diabetes (DD2) study: implementation of a nationwide patient enrollment system. *Clinical epidemiology* 2012;**4**(Suppl 1):27-36 doi: 10.2147/CLEP.S30838[published Online First: Epub Date]].
28. Thomsen RW, Friborg S, Nielsen JS, Schroll H, Johnsen SP. The Danish Centre for Strategic Research in Type 2 Diabetes (DD2): organization of diabetes care in Denmark and supplementary data sources for data collection among DD2 study participants. *Clinical epidemiology* 2012;**4**(Suppl 1):15-9 doi: 10.2147/CLEP.S30082[published Online First: Epub Date]].
29. Beck-Nielsen H, Solomon TP, Lauridsen J, et al. The Danish Centre for Strategic Research in Type 2 Diabetes (DD2) study: expected outcome from the DD2 project and two intervention studies. *Clinical epidemiology* 2012;**4**(Suppl 1):21-6 doi: 10.2147/CLEP.S30655[published Online First: Epub Date]].
30. Thomsen RW, Nielsen JS, Ulrichsen SP, Pedersen L, Hansen AM, Nilsson T. The Danish Centre for Strategic Research in Type 2 Diabetes (DD2) study: Collection of baseline data from the first 580 patients. *Clinical epidemiology* 2012;**4**:43-8 doi: 10.2147/CLEP.S30083[published Online First: Epub Date]].
31. Schneller MB, Bentsen P, Nielsen G, et al. Measuring Children's Physical Activity: Compliance Using Skin-taped Accelerometers. *Medicine and science in sports and exercise* 2017 doi: 10.1249/mss.0000000000001222[published Online First: Epub Date]].

- 1  
2  
3  
4 32. Meerwaldt R, Graaff R, Oomen PH, et al. Simple non-invasive assessment of advanced glycation  
5 endproduct accumulation. *Diabetologia* 2004;**47**(7):1324-30 doi: 10.1007/s00125-004-1451-  
6 2[published Online First: Epub Date]].
- 7 33. Touboul PJ, Hennerici MG, Meairs S, et al. Mannheim carotid intima-media thickness and plaque  
8 consensus (2004-2006-2011). An update on behalf of the advisory board of the 3rd, 4th and 5th  
9 watching the risk symposia, at the 13th, 15th and 20th European Stroke Conferences, Mannheim,  
10 Germany, 2004, Brussels, Belgium, 2006, and Hamburg, Germany, 2011. *Cerebrovasc Dis*  
11 2012;**34**(4):290-6 doi: 10.1159/000343145[published Online First: Epub Date]].
- 12 34. Grading diabetic retinopathy from stereoscopic color fundus photographs--an extension of the modified  
13 Airlie House classification. ETDRS report number 10. Early Treatment Diabetic Retinopathy Study  
14 Research Group. *Ophthalmology* 1991;**98**(5 Suppl):786-806
- 15 35. Hubbard LD, Brothers RJ, King WN, et al. Methods for evaluation of retinal microvascular abnormalities  
16 associated with hypertension/sclerosis in the Atherosclerosis Risk in Communities Study.  
17 *Ophthalmology* 1999;**106**(12):2269-80
- 18 36. Ried-Larsen M, Thomsen RW, Berencsi K, et al. Implementation of interval walking training in patients  
19 with type 2 diabetes in Denmark: rationale, design, and baseline characteristics. *Clinical*  
20 *epidemiology* 2016;**8**:201-9 doi: 10.2147/clep.s97303[published Online First: Epub Date]].
- 21 37. Brinklov CF, Thorsen IK, Karstoft K, et al. Criterion validity and reliability of a smartphone delivered sub-  
22 maximal fitness test for people with type 2 diabetes. *BMC sports science, medicine and*  
23 *rehabilitation* 2016;**8**:31 doi: 10.1186/s13102-016-0056-7[published Online First: Epub Date]].
- 24  
25  
26  
27  
28  
29  
30

31 **Table 1. Endpoint definitions.**

32 ICD-10 codes for diagnoses and operation codes were obtained from the Danish National Patient Registry,  
33 as follows:  
34

|                                                                                                                       |                                                                                                                                                     |
|-----------------------------------------------------------------------------------------------------------------------|-----------------------------------------------------------------------------------------------------------------------------------------------------|
| 35 Non-fatal myocardial infarction                                                                                    | I21-23, T822A, T823 (without death within 30 days)                                                                                                  |
| 36 Coronary revascularization                                                                                         | KFNG, KFNA, KFNB, KFNC, KFND, KFNE, KFNF, KFNH,<br>37 KFNW, KFLF                                                                                    |
| 38 Cardiac arrest with resuscitation                                                                                  | I46                                                                                                                                                 |
| 39 Hospitalization for heart failure                                                                                  | I50, I11.0, I13.0+2 (only as a-diagnosis)                                                                                                           |
| 40 Non-fatal stroke (including cerebral hemorrhage)                                                                   | I61, I63, I64, KAAL10, KAAL11 (without death within<br>41 30 days)                                                                                  |
| 42 Development of nephropathy                                                                                         | BJFD2 (chronic dialysis) or<br>43 UACR>300g/mg or<br>44 Doubling of creatinine (if creatinine >=200uM)                                              |
| 45 Development of retinopathy                                                                                         | KCKC10, KCKC15 (Laser therapy) or<br>46 KCKD65 (vitrectomy) or<br>47 H540+1+4 (blindness)                                                           |
| 48 Severe hypoglycemia leading to hospitalization                                                                     | E15, E160-2, T383A                                                                                                                                  |
| 49 Cancer (except basocellular carcinoma)                                                                             | C00-99 (except when ZM809xx are added)                                                                                                              |
| 50 Amputation of the lower limbs:                                                                                     | KNEQ, KNFQ, KNGQ, KNHQ                                                                                                                              |
| 51 Revascularization procedures and peripheral<br>52 thrombosis (not cardiovascular or cerebrovascular<br>53 disease) | I74, N280, K550-1, K558-9, H340-2<br>54 KPBE+F+H+N+P+Q, KPBW, KPGH10.<br>55 KPGE+F+H+N+P+Q, KPGW99, KPGW20,<br>56 KPEE+F+H+N+P+Q+W, KPFE+H+N+P+Q+W, |

57  
58  
59  
60

|                                   |                                                                                                                                                                                                             |
|-----------------------------------|-------------------------------------------------------------------------------------------------------------------------------------------------------------------------------------------------------------|
|                                   | KPGH20+21+22+23+30+31+40+99,<br>KPDU74+82+83+84, KPEU74+82+83+84,<br>KPFU74+82+83+84, KPAE+F+H+N+P+Q, KPAW99,<br>KPAU74, KPCE+F+H+N+P+Q, KPCW99, KPCW20,<br>KPCU74+82+83+84, KPGU74+83+84+99, KPGW,<br>KPWG |
| Fatal acute myocardial infarction | I21-23, T822A, T823, R96-99 with death within 30 days                                                                                                                                                       |
| Fatal stroke                      | I61, I63, I64 with death within 30 days                                                                                                                                                                     |

Figure 1. Study timeline.

Figure 2. Recruitment flowchart at GP level

Figure 3. Study timeline.

1  
2  
3  
4  
5  
6  
7  
8  
9  
10  
11  
12  
13  
14  
15  
16  
17  
18  
19  
20  
21  
22  
23  
24  
25  
26  
27  
28  
29  
30  
31  
32  
33  
34  
35  
36  
37  
38  
39  
40  
41  
42  
43  
44  
45  
46  
47  
48  
49  
50  
51  
52  
53  
54  
55  
56  
57  
58  
59  
60



1  
2  
3  
4  
5  
6  
7  
8  
9  
10  
11  
12  
13  
14  
15  
16  
17  
18  
19  
20  
21  
22  
23  
24  
25  
26  
27  
28  
29  
30  
31  
32  
33  
34  
35  
36  
37  
38  
39  
40  
41  
42  
43  
44  
45  
46  
47

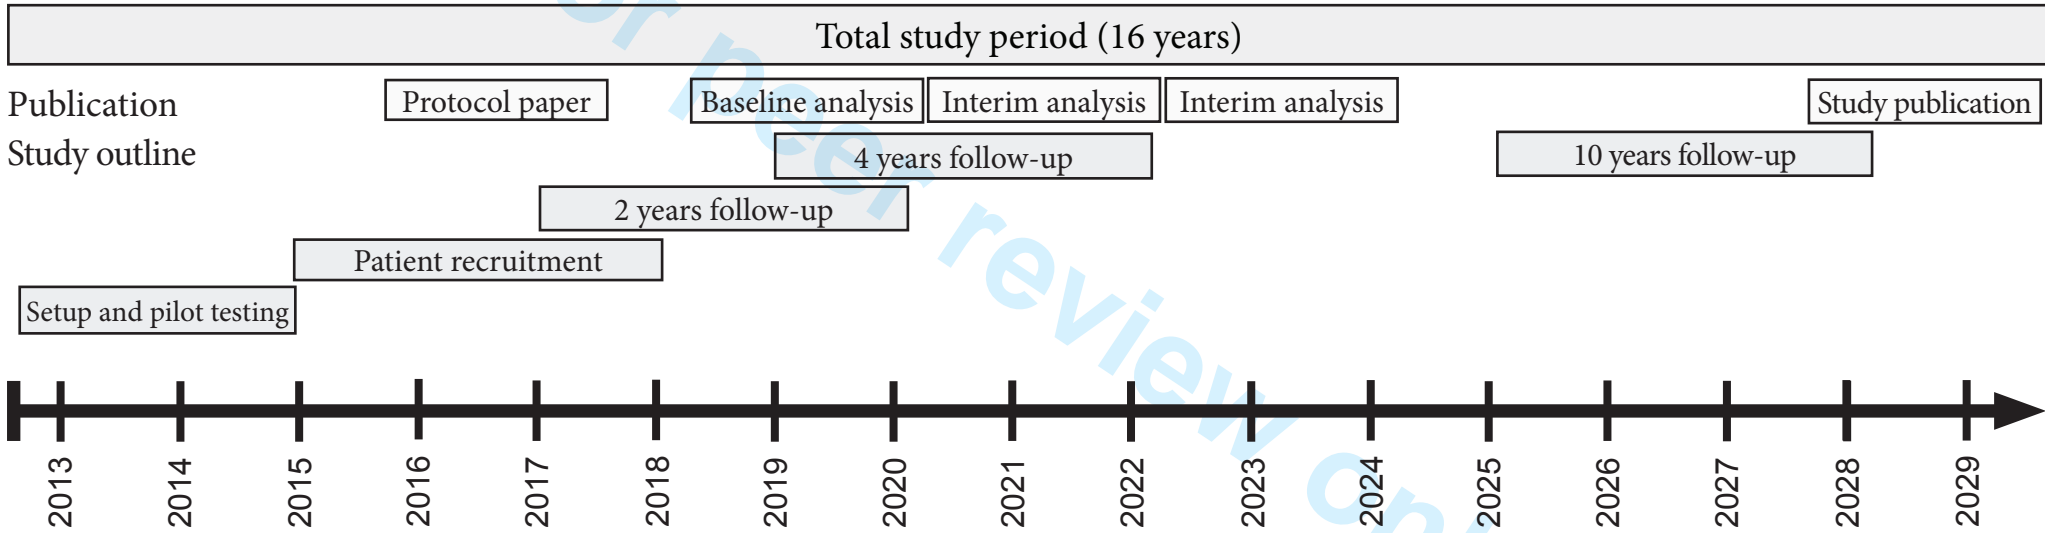

Figure 2. Recruitment flowchart at GP level

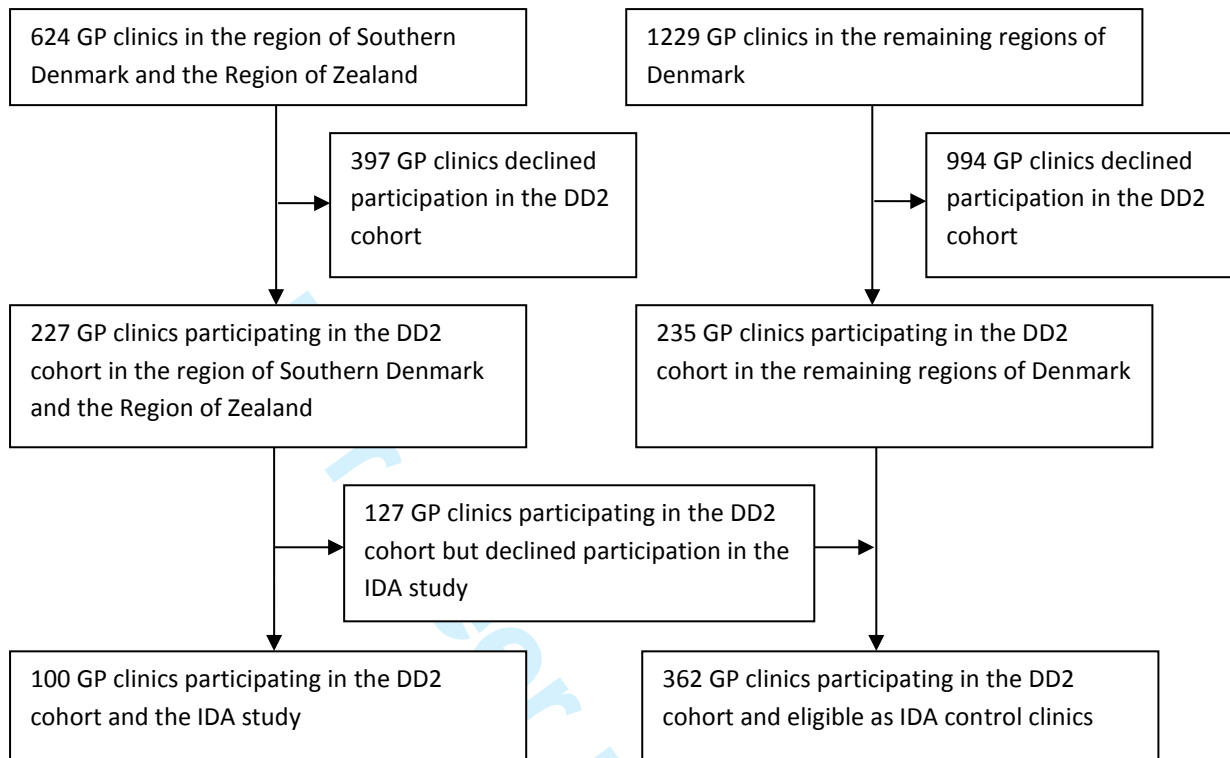

1  
2  
3  
4  
5  
6  
7  
8  
9  
10  
11  
12  
13  
14  
15  
16  
17  
18  
19  
20  
21  
22  
23  
24  
25  
26  
27  
28  
29  
30  
31  
32  
33  
34  
35  
36  
37  
38  
39  
40  
41  
42  
43  
44  
45  
46  
47  
48  
49  
50  
51  
52  
53  
54  
55  
56  
57  
58  
59  
60

For peer review only

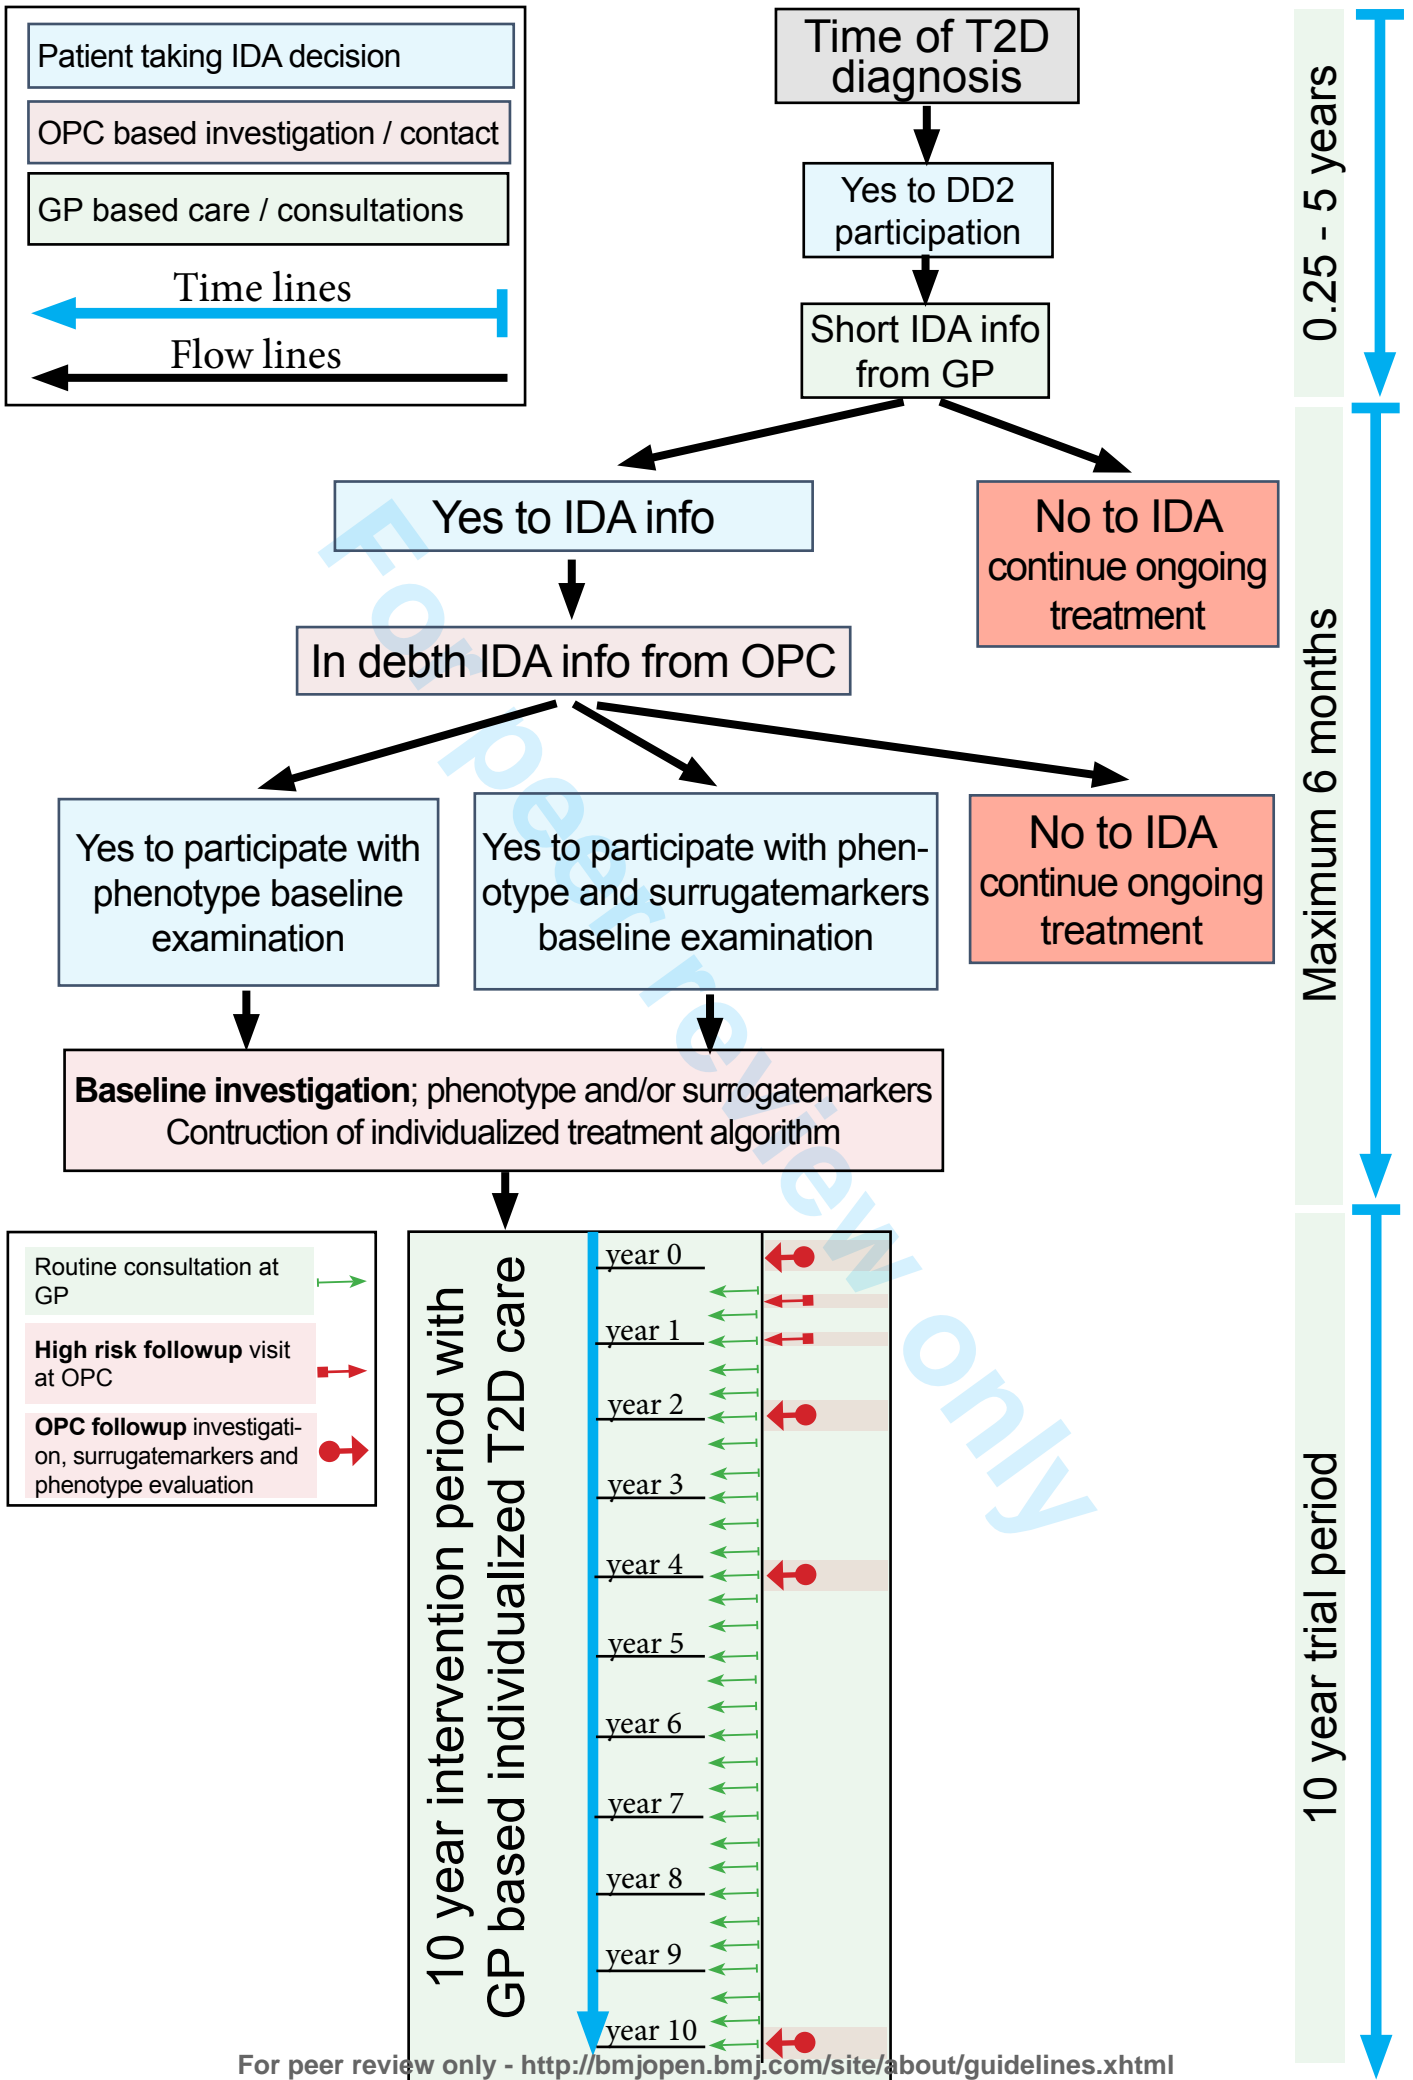

1  
2  
3  
4  
5  
6  
7  
8  
9  
10  
11  
12  
13  
14  
15  
16  
17  
18  
19  
20  
21  
22  
23  
24  
25  
26  
27  
28  
29  
30  
31  
32  
33  
34  
35  
36  
37  
38  
39  
40  
41  
42  
43  
44  
45  
46  
47  
48  
49  
50  
51  
52  
53  
54  
55  
56  
57  
58  
59  
60

Supplemental material

**Protocol for the Individualized multifactorial treatment of new clinically diagnosed type 2 diabetes in general practice (IDA)**

**- A prospective controlled multicenter open-label intervention study**

**Motivation for the proposed glucose-lowering treatment of specific pathophysiological phenotypes**

Ideally, treatment should target the pathophysiological abnormalities. As patients with insulinopenic T2D have beta cell failure, basal insulin and meal-time insulin are recommended. Beta cell failure has been linked to poor response to GLP-analogs [1]. Patients with classical and hyperinsulinemic T2D have high or very high insulin resistance and appear to have increased cardiovascular morbidity at diagnosis,[2] compared to patients with insulinopenic T2D with low insulin resistance. The primary focus in these two groups is thus to target insulin resistance. As hyperinsulinemic patients have severe insulin resistance, glitazones are also recommended for this group. Insulin is introduced earlier in the algorithm for classical T2D, as patients in this group also exhibit a degree of beta cell insufficiency. Metformin,[3], GLP-1 analogs,[4-6] glitazones,[7] and SGLT2-inhibitors,[8 9] are known to decrease insulin resistance. GLP-1 analogues also increase insulin secretion, restore first- and second-phase insulin response, and reduce glucagon secretion and body weight. A meta-analysis of randomized trials of pioglitazone reported a reduced incidence of death, myocardial infarction, and stroke compared to other medications [10]. This finding is supported by favorable effects on cardiovascular surrogate markers [7]. However, the incidence of heart failure was increased by pioglitazone treatment [10].

Evidence is accumulating that SGLT-2 inhibitors decrease the risk of major adverse cardiovascular events, cardiovascular death, heart failure, and death from any cause [11]. SGLT-2 inhibitors also induce weight

1  
2  
3  
4 reduction. Sodium retention is decreased by GLP-1 analogs and SGLT-2 inhibitors, and increased by  
5  
6 pioglitazone. The rationale for introducing pioglitazone after GLP-1 analogs and SGLT-2 inhibitors is to  
7  
8 minimize pioglitazone-induced sodium and fluid retention, thereby preventing heart failure in susceptible  
9  
10 patients. Bariatric surgery has been shown to reduce mortality, cardiovascular morbidity, and cancer  
11  
12 incidence compared to usual care [12-14], and analyses restricted to diabetic patients have had the same  
13  
14 results [15]. Diabetes remission rates also remained high after 10 years [12]. The Swedish Obese Subjects  
15  
16 (SOS) study found that fasting insulin levels predicted a successful surgical outcome, in terms of mortality  
17  
18 and CVD [12]. This supports bariatric surgery as a recommendation for patients with hyperinsulinemic T2D.

19  
20  
21  
22 The degree of evidence varies for managing specific forms of diabetes. As patients with secondary diabetes  
23  
24 have a primary beta cell defect, basal and meal-time insulin are recommended [16]. Patients with latent  
25  
26 autoimmune diabetes of the adult (LADA) have diabetes-related antibodies, as seen in type 1 diabetes, but  
27  
28 initially present as a T2D phenotype. Over time patients with LADA develop beta cell insufficiency, and  
29  
30 therefore basal and meal-time insulin are recommended. A review concluded that insulin therapy preserves  
31  
32 beta cell function better than sulphonylureas, although relevant studies on treatment of LADA are scarce  
33  
34 [17]. Since many patients with LADA have a type 2 diabetes phenotype with adipositas, metformin is also  
35  
36 recommended if  $BMI > 25 \text{ kg/m}^2$ . Maturity-onset diabetes of the young (MODY) encompasses several  
37  
38 monogenetic forms of diabetes. Patients with MODY3 and MODY1 have insulin secretion defects that  
39  
40 respond to sulphonylureas [18 19]. Patients with MODY2 have a mutation in the glucokinase gene, which  
41  
42 alters the set point of glucose control, while glucose regulation is intact [20 21]. Patients with MODY 2  
43  
44 rarely develop complications and the preferred intervention is diet.  
45  
46  
47

48  
49 Administration of glucocorticosteroids has the potential to induce diabetes onset and to exacerbate  
50  
51 existing type 2 diabetes. It has been reported that prednisolone in particular enhances postprandial plasma  
52  
53 glucose values in patients without known diabetes, with unchanged glucose levels at night and in the  
54  
55 morning [22-24]. The same results have been reported for patients with type 2 diabetes, impaired glucose  
56  
57  
58  
59  
60

1  
2  
3  
4 tolerance and normal glucose tolerance,[25-27]. Glucocorticoids impair both IS and BCF [28]. Evidence for  
5  
6 optimal treatment of steroid-induced diabetes is sparse and based on case reports. Accordingly, there is  
7  
8 little consensus regarding treatment. Insulin isophane (NPH) has been advocated [29], as well as prandial  
9  
10 insulin [28]. In patients with metabolic syndrome or T2D, it has been found that sitagliptin did not improve  
11  
12 GC-induced postprandial glucose excursions. [30 31]. Nateglinid [23 27] and glitazones have shown some  
13  
14 benefit [32 33] and metformin has been found to improve postprandial glucose values from well above 11  
15  
16 to below 7.5 mmol/l in one patient[31]. Intravenous administration of exenatide has been observed to  
17  
18 improve postprandial glucose values [34], but only when administered at breakfast and lunch [35]. In cases  
19  
20 treated with exenatide, addition of SU was needed to achieve glycemic control. A comparative study of  
21  
22 NPH insulin and insulin glargine with bolus insulin found that glucose control could be achieved, with no  
23  
24 differences between agents [36].  
25  
26  
27

### 28 **Motivation for the proposed individual lifestyle intervention**

29  
30  
31 Web- and smartphone-based applications are a possible means for effective and time-saving patient  
32  
33 counseling. However, they can result in low compliance over time and thus may be unfeasible as stand-  
34  
35 alone lifestyle interventions. A Danish internet platform called Liva has been developed during the past  
36  
37 decade by a team of dieticians, computer programmers, and physicians as a commercial weight  
38  
39 management program. Its guiding principle is to improve the cost-effectiveness of established best practice  
40  
41 for dietician-supported weight management by using an Internet platform to facilitate interactive  
42  
43 communication between dieticians and users, as well as by peer-to-peer support through the online  
44  
45 community. The program was developed iteratively through trial and error from an initial prototype and is  
46  
47 now a well-established commercial product used by 10,000 predominantly healthy overweight or  
48  
49 moderately obese persons. The effect of online dietician counseling based on this system was examined in  
50  
51 a prospective non-controlled pilot study in obese subjects, and an average weight loss of 7.0 kg (95% CI: 4.6  
52  
53 to 9.3 kg) was observed after 20 months,[37].  
54  
55  
56  
57  
58  
59  
60

1  
2  
3  
4 In Denmark, diet recommendations for the general population and for patients with T2D are 45%-60E%  
5 carbohydrates, 10%-20E% proteins, and 25%-40E% fat[38]. It is being debated whether a diet with reduced  
6 carbohydrates (40E% fat, 40E% carbohydrates, and 20E% proteins) and an increased amount of  
7  
8 unsaturated fat favors glycemic control in patients with T2D compared to current recommendations [39  
9  
10  
11  
12  
13  
14  
15  
16  
17  
18  
19  
20  
21  
22  
23  
24  
25  
26  
27  
28  
29  
30  
31  
32  
33  
34  
35  
36  
37  
38  
39  
40  
41  
42  
43  
44  
45  
46  
47  
48  
49  
50  
51  
52  
53  
54  
55  
56  
57  
58  
59  
60

patients with T2D [41].

Poor physical fitness is one of the most important independent predictors of disease progression, morbidity, and mortality for patients with T2D [42 43]. It has been found that supervised exercise increases fitness,[44]. With the increasing prevalence and incidence of T2D, fully supervised training programs for all T2D patients would be very costly and thus unrealistic. We recently tested the feasibility of implementing unsupervised interval walking training (IWT), compared with continuous walking training, among patients with T2D in a four-month randomized controlled trial [45]. We found that IWT, but not continuous walking, had remarkably beneficial effects on physical fitness level and glycemic control. Moreover, this was achieved with a compliance rate of ~90% [45] and high long-term adherence [46]. We later tested the unsupervised IWT modality for 17 months in a setting with a compliance rate of >60%[47]. On this basis, we believe that the IWT exercise modality can be implemented as unsupervised exercise in a real-life setting. To permit large-scale implementation, guide correct training intensity, and improve feasibility for patients, we developed a smartphone application (InterWalk) that can be downloaded free of charge from App Store.

#### **Determination of covariate balance in propensity score matching**

The usefulness of the propensity score models can be tested by how well covariates of the intervention and control patients match. The standardized difference should be used to compare covariates:



$$d = \frac{\bar{X}_{intervention} - \bar{X}_{control}}{\sqrt{\frac{S_{intervention}^2 - S_{control}^2}{2}}}$$

$$d = \frac{\hat{p}_{intervention} - \hat{p}_{control}}{\sqrt{\frac{\hat{p}_{intervention}(1 - \hat{p}_{intervention}) + \hat{p}_{control}(1 - \hat{p}_{control})}{2}}}$$

$\bar{x}$  denotes the mean of a continuous covariate.  $S$  is the variance.  $\hat{p}$  denotes the prevalence of dichotomous covariates. With 1:k matching, the weighted mean should be used. If  $n$  control patients are matched per intervention patient, the weight should be  $1/n$ . A difference below 0.1 is considered acceptable and should be achieved for all covariates [48]. The variance ratio should also be estimated as  $VR = \frac{S_{intervention}^2}{S_{control}^2}$ . Ratios between 0.5 and 2.0 are considered acceptable [49]. If the model does not conform to this criterion, a new model with inclusion of interaction terms and/or higher-order terms will be fitted. A quantile-quantile plot (or similar approach) for each variable (interactions can also be evaluated) should be used to compare the distribution in the intervention and control groups [50].

#### Reference List

1. Jones AG, McDonald TJ, Shields BM, et al. Markers of beta-Cell Failure Predict Poor Glycemic Response to GLP-1 Receptor Agonist Therapy in Type 2 Diabetes. *Diabetes care* 2015 doi: 10.2337/dc15-0258[published Online First: Epub Date].
2. Stidsen JV, Thomsen RW, Nielsen JS, et al. Pathophysiological Phenotypes of Clinically Diagnosed Type 2 Diabetes. Abstracts of the 74th Scientific Sessions of the American Diabetes Association, June 13-17, 2014, San Francisco, California. . *Diabetes* 2014;**63 Suppl 1**:A354-55
3. Wiernsperger NF, Bailey CJ. The antihyperglycaemic effect of metformin: therapeutic and cellular mechanisms. *Drugs* 1999;**58 Suppl 1**:31-9; discussion 75-82

- 1  
2  
3  
4 4. Derosa G, Maffioli P, Salvadeo SA, et al. Exenatide versus glibenclamide in patients with diabetes.  
5 Diabetes technology & therapeutics 2010;**12**(3):233-40 doi: 10.1089/dia.2009.0141[published  
6 Online First: Epub Date]].
- 7  
8 5. DeFronzo RA, Triplitt C, Qu Y, Lewis MS, Maggs D, Glass LC. Effects of exenatide plus rosiglitazone on  
9 beta-cell function and insulin sensitivity in subjects with type 2 diabetes on metformin. Diabetes  
10 care 2010;**33**(5):951-7 doi: 10.2337/dc09-1521[published Online First: Epub Date]].
- 11  
12 6. Zander M, Madsbad S, Madsen JL, Holst JJ. Effect of 6-week course of glucagon-like peptide 1 on  
13 glycaemic control, insulin sensitivity, and beta-cell function in type 2 diabetes: a parallel-group  
14 study. Lancet 2002;**359**(9309):824-30 doi: 10.1016/s0140-6736(02)07952-7[published Online First:  
15 Epub Date]].
- 16  
17 7. Derosa G. Efficacy and tolerability of pioglitazone in patients with type 2 diabetes mellitus: comparison  
18 with other oral antihyperglycaemic agents. Drugs 2010;**70**(15):1945-61 doi: 10.2165/11538100-  
19 000000000-00000[published Online First: Epub Date]].
- 20  
21 8. Mudaliar S, Henry RR, Boden G, et al. Changes in insulin sensitivity and insulin secretion with the sodium  
22 glucose cotransporter 2 inhibitor dapagliflozin. Diabetes technology & therapeutics 2014;**16**(3):137-  
23 44 doi: 10.1089/dia.2013.0167[published Online First: Epub Date]].
- 24  
25 9. Merovci A, Solis-Herrera C, Daniele G, et al. Dapagliflozin improves muscle insulin sensitivity but  
26 enhances endogenous glucose production. The Journal of clinical investigation 2014;**124**(2):509-14  
27 doi: 10.1172/jci70704[published Online First: Epub Date]].
- 28  
29 10. Lincoff AM, Wolski K, Nicholls SJ, Nissen SE. Pioglitazone and risk of cardiovascular events in patients  
30 with type 2 diabetes mellitus: a meta-analysis of randomized trials. JAMA : the journal of the  
31 American Medical Association 2007;**298**(10):1180-8 doi: 10.1001/jama.298.10.1180[published  
32 Online First: Epub Date]].
- 33  
34 11. Wu JH, Foote C, Blomster J, et al. Effects of sodium-glucose cotransporter-2 inhibitors on cardiovascular  
35 events, death, and major safety outcomes in adults with type 2 diabetes: a systematic review and  
36 meta-analysis. The lancet. Diabetes & endocrinology 2016 doi: 10.1016/s2213-8587(16)00052-  
37 8[published Online First: Epub Date]].
- 38  
39 12. Sjostrom L. Review of the key results from the Swedish Obese Subjects (SOS) trial - a prospective  
40 controlled intervention study of bariatric surgery. Journal of internal medicine 2013;**273**(3):219-34  
41 doi: 10.1111/joim.12012[published Online First: Epub Date]].
- 42  
43 13. Christou NV, Sampalis JS, Liberman M, et al. Surgery decreases long-term mortality, morbidity, and  
44 health care use in morbidly obese patients. Annals of surgery 2004;**240**(3):416-23; discussion 23-4
- 45  
46 14. Adams TD, Gress RE, Smith SC, et al. Long-term mortality after gastric bypass surgery. The New England  
47 journal of medicine 2007;**357**(8):753-61 doi: 10.1056/NEJMoa066603[published Online First: Epub  
48 Date]].
- 49  
50 15. Romeo S, Maglio C, Burza MA, et al. Cardiovascular events after bariatric surgery in obese subjects with  
51 type 2 diabetes. Diabetes care 2012;**35**(12):2613-7 doi: 10.2337/dc12-0193[published Online First:  
52 Epub Date]].
- 53  
54 16. Ewald N, Hardt PD. Diagnosis and treatment of diabetes mellitus in chronic pancreatitis. World journal  
55 of gastroenterology : WJG 2013;**19**(42):7276-81 doi: 10.3748/wjg.v19.i42.7276[published Online  
56 First: Epub Date]].
- 57  
58 17. Brophy S, Davies H, Mannan S, Brunt H, Williams R. Interventions for latent autoimmune diabetes  
59 (LADA) in adults. Cochrane Database Syst Rev 2011;**9**:CD006165 doi:  
60 10.1002/14651858.CD006165.pub3[published Online First: Epub Date]].
18. Pearson ER, Pruhova S, Tack CJ, et al. Molecular genetics and phenotypic characteristics of MODY  
caused by hepatocyte nuclear factor 4alpha mutations in a large European collection. Diabetologia  
2005;**48**(5):878-85 doi: 10.1007/s00125-005-1738-y[published Online First: Epub Date]].
19. Pearson ER, Liddell WG, Shepherd M, Corrall RJ, Hattersley AT. Sensitivity to sulphonylureas in patients  
with hepatocyte nuclear factor-1alpha gene mutations: evidence for pharmacogenetics in diabetes.  
Diabetic medicine : a journal of the British Diabetic Association 2000;**17**(7):543-5

- 1
- 2
- 3
- 4 20. Velho G, Blanche H, Vaxillaire M, et al. Identification of 14 new glucokinase mutations and description
- 5 of the clinical profile of 42 MODY-2 families. *Diabetologia* 1997;**40**(2):217-24 doi:
- 6 10.1007/s001250050666[published Online First: Epub Date]].
- 7
- 8 21. Byrne MM, Sturis J, Clement K, et al. Insulin secretory abnormalities in subjects with hyperglycemia due
- 9 to glucokinase mutations. *The Journal of clinical investigation* 1994;**93**(3):1120-30 doi:
- 10 10.1172/JCI117064[published Online First: Epub Date]].
- 11
- 12 22. Iwamoto T, Kagawa Y, Naito Y, Kuzuhara S, Kojima M. Steroid-induced diabetes mellitus and related risk
- 13 factors in patients with neurologic diseases. *Pharmacotherapy* 2004;**24**(4):508-14
- 14
- 15 23. Ito S, Ogishima H, Kondo Y, et al. Early diagnosis and treatment of steroid-induced diabetes mellitus in
- 16 patients with rheumatoid arthritis and other connective tissue diseases. *Modern rheumatology /*
- 17 *the Japan Rheumatism Association* 2014;**24**(1):52-9 doi: 10.3109/14397595.2013.852855[published
- 18 Online First: Epub Date]].
- 19
- 20 24. Burt MG, Roberts GW, Aguilar-Loza NR, Frith P, Stranks SN. Continuous monitoring of circadian glycemic
- 21 patterns in patients receiving prednisolone for COPD. *The Journal of clinical endocrinology and*
- 22 *metabolism* 2011;**96**(6):1789-96 doi: 10.1210/jc.2010-2729[published Online First: Epub Date]].
- 23
- 24 25. Burt MG, Drake SM, Aguilar-Loza NR, Esterman A, Stranks SN, Roberts GW. Efficacy of a basal bolus
- 25 insulin protocol to treat prednisolone-induced hyperglycaemia in hospitalised patients. *Internal*
- 26 *medicine journal* 2015;**45**(3):261-6 doi: 10.1111/imj.12680[published Online First: Epub Date]].
- 27
- 28 26. Yuen KC, McDaniel PA, Riddle MC. Twenty-four-hour profiles of plasma glucose, insulin, C-peptide and
- 29 free fatty acid in subjects with varying degrees of glucose tolerance following short-term, medium-
- 30 dose prednisone (20 mg/day) treatment: evidence for differing effects on insulin secretion and
- 31 action. *Clinical endocrinology* 2012;**77**(2):224-32 doi: 10.1111/j.1365-2265.2011.04242.x[published
- 32 Online First: Epub Date]].
- 33
- 34 27. Uzu T, Harada T, Sakaguchi M, et al. Glucocorticoid-induced diabetes mellitus: prevalence and risk
- 35 factors in primary renal diseases. *Nephron. Clinical practice* 2007;**105**(2):c54-7 doi:
- 36 10.1159/000097598[published Online First: Epub Date]].
- 37
- 38 28. van Raalte DH, Diamant M. Steroid diabetes: from mechanism to treatment? *The Netherlands journal of*
- 39 *medicine* 2014;**72**(2):62-72
- 40
- 41 29. Clore JN, Thurby-Hay L. Glucocorticoid-induced hyperglycemia. *Endocrine practice : official journal of*
- 42 *the American College of Endocrinology and the American Association of Clinical Endocrinologists*
- 43 *2009*;**15**(5):469-74 doi: 10.4158/EP08331.RAR[published Online First: Epub Date]].
- 44
- 45 30. van Genugten RE, van Raalte DH, Muskiet MH, et al. Does dipeptidyl peptidase-4 inhibition prevent the
- 46 diabetogenic effects of glucocorticoids in men with the metabolic syndrome? A randomized
- 47 controlled trial. *European journal of endocrinology / European Federation of Endocrine Societies*
- 48 *2014*;**170**(3):429-39 doi: 10.1530/eje-13-0610[published Online First: Epub Date]].
- 49
- 50 31. Ishibashi C, Yasuda T, Matsuoka T-a, et al. A case of glucocorticoid-induced diabetes in which the
- 51 efficacy between sitagliptin and metformin was compared. *Diabetology International* 2015;**7**(1):89-
- 52 94 doi: 10.1007/s13340-015-0209-z[published Online First: Epub Date]].
- 53
- 54 32. Luther P, Baldwin D, Jr. Pioglitazone in the management of diabetes mellitus after transplantation.
- 55 *American journal of transplantation : official journal of the American Society of Transplantation and*
- 56 *the American Society of Transplant Surgeons* 2004;**4**(12):2135-8 doi: 10.1111/j.1600-
- 57 6143.2004.00613.x[published Online First: Epub Date]].
- 58
- 59 33. Baldwin D, Jr., Duffin KE. Rosiglitazone treatment of diabetes mellitus after solid organ transplantation.
- 60 *Transplantation* 2004;**77**(7):1009-14

- 1  
2  
3  
4 35. Matsuo K, Nambu T, Matsuda Y, et al. Evaluation of the effects of exenatide administration in patients  
5 with type 2 diabetes with worsened glycemic control caused by glucocorticoid therapy. *Intern Med*  
6 2013;**52**(1):89-95
- 7 36. Ruiz de Adana MS, Colomo N, Maldonado-Araque C, et al. Randomized clinical trial of the efficacy and  
8 safety of insulin glargine vs. NPH insulin as basal insulin for the treatment of glucocorticoid induced  
9 hyperglycemia using continuous glucose monitoring in hospitalized patients with type 2 diabetes  
10 and respiratory disease. *Diabetes research and clinical practice* 2015;**110**(2):158-65 doi:  
11 10.1016/j.diabres.2015.09.015[published Online First: Epub Date] | .
- 12 37. Brandt V, Brandt CJ, Glinborg D, Arendal C, Toubro S, Brandt K. Sustained Weight Loss during 20  
13 Months using a Personalized Interactive Internet Based Dietician Advice Program in a General  
14 Practice Setting. *International Journal on Advances in Life Sciences* 2011;**3**(no. 1 & 2):23-28
- 15 38. Järvinen B, Ólafsson S, Sletsjøe H, et al. *Nordic Nutrition Recommendations 2012 - Integrating nutrition*  
16 *and physical activity*95946. Nordic Council of Ministers: Nordic Council of Ministers, 2014.
- 17 39. van Wyk HJ, Davis RE, Davies JS. A critical review of low-carbohydrate diets in people with Type 2  
18 diabetes. *Diabetic medicine : a journal of the British Diabetic Association* 2016;**33**(2):148-57 doi:  
19 10.1111/dme.12964[published Online First: Epub Date] | .
- 20 40. Asplund K, Axelsen M, Berglund G, et al. Dietary Treatment of Diabetes - A Systematic Review. In:  
21 ROSÉN M, ed. SBU Board of Directors and Scientific Advisory Committee. Stockholm SBU, 2010.
- 22 41. Emadian A, Andrews RC, England CY, Wallace V, Thompson JL. The effect of macronutrients on  
23 glycaemic control: a systematic review of dietary randomised controlled trials in overweight and  
24 obese adults with type 2 diabetes in which there was no difference in weight loss between  
25 treatment groups. *The British journal of nutrition* 2015;**114**(10):1656-66 doi:  
26 10.1017/s0007114515003475[published Online First: Epub Date] | .
- 27 42. Gulati M, Black HR, Shaw LJ, et al. The prognostic value of a nomogram for exercise capacity in women.  
28 *The New England journal of medicine* 2005;**353**(5):468-75 doi: 10.1056/NEJMoa044154[published  
29 Online First: Epub Date] | .
- 30 43. Hainer V, Toplak H, Stich V. Fat or fit: what is more important? *Diabetes care* 2009;**32 Suppl 2**:S392-7  
31 doi: 10.2337/dc09-S346[published Online First: Epub Date] | .
- 32 44. Umpierre D, Ribeiro PA, Schaan BD, Ribeiro JP. Volume of supervised exercise training impacts  
33 glycaemic control in patients with type 2 diabetes: a systematic review with meta-regression  
34 analysis. *Diabetologia* 2013;**56**(2):242-51 doi: 10.1007/s00125-012-2774-z[published Online First:  
35 Epub Date] | .
- 36 45. Karstoft K, Winding K, Knudsen SH, et al. The effects of free-living interval-walking training on glycemic  
37 control, body composition, and physical fitness in type 2 diabetic patients: a randomized, controlled  
38 trial. *Diabetes care* 2013;**36**(2):228-36 doi: 10.2337/dc12-0658[published Online First: Epub Date] | .
- 39 46. Ried-Larsen M, Thomsen RW, Berencsi K, et al. Implementation of interval walking training in patients  
40 with Type 2 diabetes in Denmark; Rationale, design and baseline characteristics. *Clinical*  
41 *Epidemiology* 2016;**in press**
- 42 47. Ried-Larsen M, Thomsen RW, Berencsi K, et al. Implementation of interval walking training in patients  
43 with type 2 diabetes in Denmark: rationale, design, and baseline characteristics. *Clinical*  
44 *epidemiology* 2016;**8**:201-9 doi: 10.2147/clep.s97303[published Online First: Epub Date] | .
- 45 48. Austin PC. An Introduction to Propensity Score Methods for Reducing the Effects of Confounding in  
46 Observational Studies. *Multivariate behavioral research* 2011;**46**(3):399-424 doi:  
47 10.1080/00273171.2011.568786[published Online First: Epub Date] | .
- 48 49. Linden A, Samuels SJ. Using balance statistics to determine the optimal number of controls in matching  
49 studies. *Journal of evaluation in clinical practice* 2013;**19**(5):968-75 doi:  
50 10.1111/jep.12072[published Online First: Epub Date] | .
- 51 50. Linden A. Graphical displays for assessing covariate balance in matching studies. *Journal of evaluation in*  
52 *clinical practice* 2015;**21**(2):242-7 doi: 10.1111/jep.12297[published Online First: Epub Date] | .  
53  
54  
55  
56  
57  
58  
59  
60

1  
2  
3  
4  
5  
6  
7  
8  
9  
10  
11  
12  
13  
14  
15  
16  
17  
18  
19  
20  
21  
22  
23  
24  
25  
26  
27  
28  
29  
30  
31  
32  
33  
34  
35  
36  
37  
38  
39  
40  
41  
42  
43  
44  
45  
46  
47  
48  
49  
50  
51  
52  
53  
54  
55  
56  
57  
58  
59  
60

For peer review only

# BMJ Open

**Protocol for the specialist supervised Individualized multifactorial treatment of new clinically diagnosed type 2 diabetes in general practice (IDA)  
– A prospective controlled multicenter open-label intervention study**

|                                 |                                                                                                                                                                                                                                                                                                                                                                                                                                                                                                                                                                                                                                                                                                                                                                                                                                                                                                                                                                                                                                                                                                                                                                                                                            |
|---------------------------------|----------------------------------------------------------------------------------------------------------------------------------------------------------------------------------------------------------------------------------------------------------------------------------------------------------------------------------------------------------------------------------------------------------------------------------------------------------------------------------------------------------------------------------------------------------------------------------------------------------------------------------------------------------------------------------------------------------------------------------------------------------------------------------------------------------------------------------------------------------------------------------------------------------------------------------------------------------------------------------------------------------------------------------------------------------------------------------------------------------------------------------------------------------------------------------------------------------------------------|
| Journal:                        | <i>BMJ Open</i>                                                                                                                                                                                                                                                                                                                                                                                                                                                                                                                                                                                                                                                                                                                                                                                                                                                                                                                                                                                                                                                                                                                                                                                                            |
| Manuscript ID                   | bmjopen-2017-017493.R1                                                                                                                                                                                                                                                                                                                                                                                                                                                                                                                                                                                                                                                                                                                                                                                                                                                                                                                                                                                                                                                                                                                                                                                                     |
| Article Type:                   | Protocol                                                                                                                                                                                                                                                                                                                                                                                                                                                                                                                                                                                                                                                                                                                                                                                                                                                                                                                                                                                                                                                                                                                                                                                                                   |
| Date Submitted by the Author:   | 07-Sep-2017                                                                                                                                                                                                                                                                                                                                                                                                                                                                                                                                                                                                                                                                                                                                                                                                                                                                                                                                                                                                                                                                                                                                                                                                                |
| Complete List of Authors:       | Stidsen, Jacob; Diabetes Research Centre, Centre for Individualized Medicine in Arterial Diseases, Odense University Hospital, Department of Endocrinology<br>Nielsen, Jens; Diabetes Research Centre, Centre for Individualized Medicine in Arterial Diseases, Odense University Hospital, Department of Endocrinology<br>Henriksen, Jan; Diabetes Research Centre, Centre for Individualized Medicine in Arterial Diseases, Odense University Hospital, Department of Endocrinology<br>Friborg, Søren; Diabetes Research Centre, Centre for Individualized Medicine in Arterial Diseases, Odense University Hospital, Department of Endocrinology<br>Thomsen, Reimar; Aarhus University Hospital, Clinical Epidemiology<br>Olesen, Thomas; Diabetes Research Centre, Centre for Individualized Medicine in Arterial Diseases, Odense University Hospital, Department of Endocrinology<br>Olsen, Michael; Diabetes Research Centre, Centre for Individualized Medicine in Arterial Diseases, Odense University Hospital, Department of Endocrinology<br>Beck-Nielsen, Henning; Diabetes Research Centre, Centre for Individualized Medicine in Arterial Diseases, Odense University Hospital, Department of Endocrinology |
| <b>Primary Subject Heading</b>: | Diabetes and endocrinology                                                                                                                                                                                                                                                                                                                                                                                                                                                                                                                                                                                                                                                                                                                                                                                                                                                                                                                                                                                                                                                                                                                                                                                                 |
| Secondary Subject Heading:      | Patient-centred medicine                                                                                                                                                                                                                                                                                                                                                                                                                                                                                                                                                                                                                                                                                                                                                                                                                                                                                                                                                                                                                                                                                                                                                                                                   |
| Keywords:                       | clinical diabetes, insulin sensitivity and resistance, insulin secretion, pathophysiology, individualized treatment, treatment guidelines                                                                                                                                                                                                                                                                                                                                                                                                                                                                                                                                                                                                                                                                                                                                                                                                                                                                                                                                                                                                                                                                                  |
|                                 |                                                                                                                                                                                                                                                                                                                                                                                                                                                                                                                                                                                                                                                                                                                                                                                                                                                                                                                                                                                                                                                                                                                                                                                                                            |

SCHOLARONE™  
Manuscripts

Manuscript ID bmjopen-2017-017493

Revised version 04-09-2017 without highlight of changes

1  
2  
3  
4  
5  
6 **Protocol for the specialist supervised Individualized multifactorial**  
7 **treatment of new clinically diagnosed type 2 diabetes in general practice**  
8 **(IDA)**  
9

10  
11  
12 **- A prospective controlled multicenter open-label intervention study**  
13  
14

15  
16  
17  
18 Jacob Volmer Stidsen<sup>1</sup>, Jens Steen Nielsen<sup>1</sup>, Jan Erik Henriksen<sup>1</sup>, Søren Gunnar Friberg<sup>1</sup>, Reimar Wernich  
19 Thomsen<sup>2</sup>, Thomas Bastholm Olesen<sup>1</sup>, Michael Hecht Olsen<sup>1</sup>, Henning Beck-Nielsen<sup>1</sup>  
20  
21

22  
23 <sup>1</sup>Diabetes Research Centre, Department of Endocrinology, Centre for Individualized Medicine in Arterial  
24 Diseases, Odense University Hospital, Odense, Denmark  
25

26 <sup>2</sup>Department of Clinical Epidemiology, Aarhus University Hospital, Aarhus, Denmark  
27  
28

29  
30  
31 **Corresponding author:** Henning Beck-Nielsen, Danish Centre for Strategic Research in Type 2 Diabetes  
32 (DD2), Department of Endocrinology M, Diabetes Research Centre, Odense University Hospital,  
33 Kloevervaenget 6, 4th Floor, 5000 Odense C, Denmark, Tel +45 6541 3444, Fax +45 6591 9653, Email  
34 [henning.beck-nielsen@rsyd.dk](mailto:henning.beck-nielsen@rsyd.dk)  
35  
36

37  
38 **Word count:** 6965  
39  
40  
41  
42  
43  
44  
45  
46  
47  
48  
49  
50  
51  
52  
53  
54  
55  
56  
57  
58  
59  
60



Manuscript ID bmjopen-2017-017493

Revised version 04-09-2017 without highlight of changes

## ABSTRACT

**Introduction.** We present the protocol for a multifactorial intervention study designed to test whether individualized treatment, based on pathophysiological phenotyping and individualized treatment goals, improves type 2 diabetes (T2D) outcomes.

**Methods and analysis.** We will conduct a prospective controlled multicentre open-label intervention study, drawing on the longitudinal cohort of the Danish Centre for Strategic Research in Type 2 Diabetes (DD2). New clinically diagnosed T2D patients in the intervention group will be assigned to receive individualized treatment by their general practitioner. Intervention patients will be compared with a matched control cohort of DD2 patients receiving routine clinical care. Among intervention patients, we will first do pathophysiological phenotyping to classify patients into WHO-defined T2D or other specific types of diabetes (monogenic diabetes, secondary diabetes, etc.). WHO-defined T2D patients will then be further sub-characterized by their beta cell function (BCF) and insulin sensitivity (IS), using the revised homeostatic assessment model, as having either insulinopenic T2D (high IS and low BCF), classical T2D (low IS and low BCF), or hyperinsulinemic T2D (low IS and high BCF). For each sub-type a specific treatment algorithm will target the primary pathophysiological defect. Similarly, antihypertensive treatment will be targeted at the specific underlying pathophysiology, characterized by impedance cardiography (relative importance of vascular resistance, intravascular volume, and cardiac inotropy). All treatment goals will be based on individual patient assessment of expected positive versus adverse effects. Web-based and face-to-face individualized lifestyle intervention will also be implemented to empower patients to make a sustainable improvement in daily physical activity and to change to a low-carbohydrate diet.

**Ethics and dissemination.** The study will use well-known pharmacological agents according to their labels; patient safety is therefore considered high. Study results will be published in international peer-reviewed journals. The study is registered at ClinicalTrials.gov, number NCT02015130.



Manuscript ID bmjopen-2017-017493

Revised version 04-09-2017 without highlight of changes

## STRENGTHS AND LIMITATIONS

### *Strengths*

- The IDA study is a nationwide intervention study in primary care, based on a close cooperation between hospital-based diabetes specialists and general practitioners
- The study includes patients who are newly diagnosed with T2D and enrolled consecutively without selection
- Endocrinological assessment of pathophysiological phenotypes will form the basis for individual treatment algorithms, made readily available to primary health care providers.
- The study will clarify if an individualized approach to the pharmacological and lifestyle treatment of T2D with individualized treatment goals is associated with a range of improved hard outcomes in everyday clinical practice, including micro- and macrovascular complications and death

### *Limitations*

- The study is not randomized, and potential differences in prognostic factors between intervention and control patients need to be addressed by rigorous statistical methods
- Existing high-quality healthcare registries will be used for assessment of outcomes, rather than primary adjudication of end-points

## INTRODUCTION

### *The importance of individualized glycaemic control*

Although current advances in the T2D treatment have reduced mortality [1] and possibly complications [2] among T2D patients, they still suffer excess mortality compared to people without diabetes [3]. Poor glycaemic control has been linked to cardiovascular morbidity, even below the threshold for diabetes [4], although increased mortality is also seen in the lowest 10<sup>th</sup> percentile of HbA1c values [5]. This has led to

Manuscript ID bmjopen-2017-017493

Revised version 04-09-2017 without highlight of changes

1  
2  
3  
4 several trials testing intensive glucose-lowering against moderate glucose-lowering strategies [6-8]. Their  
5  
6 results have been inconclusive, and a meta-analysis of trials of intensive glucose-lowering found no effect  
7  
8 on mortality (RR 1.04, 0.91-1.19) or cardiovascular mortality (RR 1.11, 0.86-1.43). A significant effect (risk  
9  
10 ratio 0.85, 0.74-0.96) was observed for non-fatal myocardial infarction, although in analyses restricted to  
11  
12 high quality studies there was no favorable effect for any myocardial infarction (RR 1.34, 0.77-2.35). In  
13  
14 addition, a potential effect was observed for new or worsening retinopathy (RR 0.85, 0.71-1.03) [9 10]. On  
15  
16 the other hand, intensive glucose control was associated with a significant increase in severe hypoglycemic  
17  
18 events (RR 2.33, 1.62-3.36) [9] The analyzed trials are heterogeneous with respect to diabetes duration  
19  
20 among included patients, and achieved HbA1c. In the UKPDS study, intensive glucose lowering to an HbA1c  
21  
22 of 7.0% in newly diagnosed T2D was associated with reduced all-cause mortality [11-13], and this has  
23  
24 recently been confirmed in an observational study design[14]. Intensive glucose lowering of HbA1c to 6.4%  
25  
26 in the ACCORD trial among patients with longer duration of diabetes was associated with an increased risk  
27  
28 of all-cause and cardiovascular mortality [6 15]. Post-hoc analyses of the ADVANCE study, which sought to  
29  
30 determine the effect on cardiovascular disease of intensive glucose-lowering compared to standard glucose  
31  
32 lowering treatment, have shown that patients with severe hypoglycemic events have a higher incidence of  
33  
34 micro- and macrovascular events, as well as mortality [16]. Together, these results indicate the necessity  
35  
36 for an individualized approach, with differentiated goals for glycemic control. A tight glycemic goal of 48  
37  
38 mmol/mol seems relevant for many patients with newly diagnosed T2D, while patients with former CVD,  
39  
40 neuropathy, or high risk of hypoglycemic events arguably could aim for an HbA1c below 58 mmol/mol [17].  
41  
42 Frail patients should aim for relief of hyperglycemic symptoms and treatment should confer a very low  
43  
44 hypoglycemic risk [17].  
45  
46  
47  
48

49  
50 Nonvascular outcomes in T2D become increasingly important these years. The incidence of cancer overall  
51  
52 and of several specific cancers is substantially increased in patients with T2D compared to persons without  
53  
54 diabetes [18 19], and also mortality from cancer is increased [20]. Whether specific glucose lowering  
55  
56 therapies are associated with increased or reduced risk of cancer remains uncertain. A meta-analysis has  
57  
58  
59  
60

Manuscript ID bmjopen-2017-017493

Revised version 04-09-2017 without highlight of changes

1  
2  
3  
4 reported a possibly reduced cancer risk with metformin and thiazolidinediones therapy, and an increased  
5  
6 risk with insulin, sulfonylurea and alpha glucosidase inhibitor use. When the meta-analysis was restricted to  
7  
8 RCTs these associations could not be confirmed, with the limitation that most RCTs are too short to properly  
9  
10 elucidate cancer risk and have heterogeneous comparators [21]. These uncertainties highlight the need for  
11  
12 long-term evaluation of therapy not only with regard to micro- and macrovascular disease but also with  
13  
14 respect to cancer risk.  
15  
16

### 17 *Improved glycemic control through better pathophysiological phenotyping*

18  
19  
20 Diabetes is classified into type 1 diabetes, T2D, other specific types of diabetes, and gestational diabetes  
21  
22 [22]. It has become increasingly clear that diabetes is a more heterogeneous disease [23]. Data from the  
23  
24 Danish Centre for Strategic Research in Type 2 Diabetes (DD2) show that in clinical practice patients with  
25  
26 other specific types of diabetes than T2D (for example, glucocorticoid-induced, LADA or secondary  
27  
28 diabetes) are often misclassified as classical WHO-defined T2D patients. As the pathophysiology of other  
29  
30 specific types of diabetes is potentially different from classical WHO-defined T2D [24] poor glycemic control  
31  
32 could be a consequence if the given treatment does not address the underlying pathophysiological defect.  
33  
34 Moreover, DD2 data also show that the classical WHO-defined T2D population is heterogeneous and may  
35  
36 be further classified according to pathophysiological phenotypes, with potential implications for  
37  
38 appropriate glucose-lowering treatment [25]. In addition ethnic differences in the pathophysiology of T2D  
39  
40 have been reported [26 27] underlining the importance of both inter- and intra-ethnic heterogeneity in  
41  
42 T2D.  
43  
44  
45

### 46 *The importance of individualized blood pressure control*

47  
48  
49 Elevated blood pressure in patients with T2D is associated with cardiovascular death, starting with a systolic  
50  
51 blood pressure of 120 mmHg [28]. A recent meta-analysis concluded that when systolic office blood  
52  
53 pressure was below 140 mmHg, further reduction in blood pressure was associated with increased risk of  
54  
55 cardiovascular death in patients with diabetes [29]. However, even under optimal conditions, blood  
56  
57  
58  
59  
60

Manuscript ID bmjopen-2017-017493

Revised version 04-09-2017 without highlight of changes

1  
2  
3  
4 pressure control is very difficult to achieve, with only 50% of patients reaching a systolic blood pressure  
5  
6 below 140 mmHg [30]. Impedance cardiography has been shown to increase the proportion of patients  
7  
8 who achieve blood pressure control [31]. A recent study in a specialized hypertension clinic could not  
9  
10 replicate this finding, although the incidence of adverse events was significantly reduced in patients in the  
11  
12 impedance group [32]. Impedance cardiography offers an assessment of cardiac contractility, vascular  
13  
14 resistance, and intravascular volume. In the IDA study, these estimates will be used to guide selection of  
15  
16 anti-hypertensive treatment in order to obtain better blood pressure control and to reduce side-effects.  
17  
18

### 19 20 *The importance of individualized lifestyle changes*

21  
22 Lifestyle changes are the first-choice treatment for patients with newly diagnosed T2D. However, such  
23  
24 changes are often difficult to implement and also costly, if they need to be supervised. Promoting  
25  
26 individualized lifestyle changes will be an important part of this study. Our aim is to provide evidence-based  
27  
28 lifestyle interventions that are feasible to implement on an everyday basis. We hope to empower patients  
29  
30 to implement changes in their everyday life via face-to-face consultations and novel individualized  
31  
32 supportive E-health solutions. We plan to identify and describe patients who will benefit clinically from the  
33  
34 E-health solutions being offered and to use this knowledge for large-scale implementation of individualized  
35  
36 E-health technology in daily clinical practice.  
37  
38

### 39 40 41 *The importance of multifactorial management of T2D*

42  
43 The Steno 2 study underlined the importance of multifactorial intervention in longer-standing T2D with a  
44  
45 marked and durable reduction in morbidity and mortality associated with multifactorial intervention [1]. A  
46  
47 multifactorial approach is also emphasized in the current diabetes guidelines [17 33]. In the current study  
48  
49 we therefore aim to develop specific individualized approaches to the various components of a  
50  
51 multifactorial intervention.  
52  
53

### 54 55 56 *The importance of diabetes management in general practice*

Manuscript ID bmjopen-2017-017493

Revised version 04-09-2017 without highlight of changes

1  
2  
3  
4 Primary health care providers have an integrated knowledge of the medical history, social status, and  
5  
6 family relationships of their patients, together with a general knowledge of treatment. “The Individualized  
7  
8 treatment of newly clinical diagnosed T2D in general practice study” (IDA) is designed to integrate specialist  
9  
10 knowledge and examinations into the treatment of patients in primary care. Endocrinological assessment  
11  
12 of pathophysiological phenotypes will form the basis for individual treatment algorithms, made readily  
13  
14 available to primary health care providers.  
15

### 16 17 18 **HYPOTHESIS**

19  
20 We hypothesize that individualized treatment based on pathophysiological traits and a new guidance  
21  
22 strategy will improve glycemic and blood pressure regulation and reduce complications in clinically  
23  
24 diagnosed T2D patients, compared with outcomes under current guidelines. We hypothesize that  
25  
26 individualized treatment will reduce side-effects and polypharmacy, thereby improving patient compliance  
27  
28 and quality of life. Furthermore, we hypothesize that an individually tailored approach has the potential to  
29  
30 improve the cost-benefit ratio of T2D treatment.  
31  
32

### 33 34 35 **AIM**

36  
37 The study’s aim is to investigate the effect of a new treatment concept for patients with T2D based on  
38  
39 personalized treatment in general practice supervised by specialists. Treatment goals, lifestyle  
40  
41 interventions, and pharmacological treatment will be individualized. Medication choices will be based on  
42  
43 pathophysiological measurements of possible underlying causes of hyperglycaemia and hypertension in  
44  
45 individual patients.  
46  
47

### 48 49 50 **OBJECTIVES**

51  
52 The primary objective of the study is to assess the effect of individualized, multifactorial, interactive, and  
53  
54 supervised treatment in patients with T2D, compared to treatment based on contemporary guidelines. The  
55  
56 composite clinical outcome measure will encompass all-cause mortality, micro- and macrovascular  
57  
58  
59  
60

Manuscript ID bmjopen-2017-017493

Revised version 04-09-2017 without highlight of changes

1  
2  
3  
4 complications, cancer, and hypoglycemia. Secondary objectives are to assess effects on individual clinical  
5  
6 outcomes, socioeconomic costs and quality of life.  
7  
8

## 9 **METHODS AND ANALYSIS**

### 10 **Setting and design**

11  
12  
13  
14  
15 The study is designed as a prospective controlled multicenter open-label study of a controlled intervention,  
16  
17 in the longitudinal DD2 cohort. Newly diagnosed T2D patients are enrolled prospectively in the population-  
18  
19 based DD2 cohort. At baseline, the DD2 project collects interview data and biobanks blood and urine  
20  
21 samples [34 35]. Following enrolment, each participant is followed over time using data in nationwide  
22  
23 registries [36]. The registries have documented high validity [37-39]. The collected data in the study is  
24  
25 summarized in table 1. This study is one of several planned studies drawing on the cohort [40].  
26  
27

28  
29 The study setting will be community-based. Patients in the intervention group will be recruited and treated  
30  
31 by their general practitioners (GPs). Patients in the control group will be passive study participants,  
32  
33 followed longitudinally using information from the DD2 cohort and biobank [41] and linked longitudinal to  
34  
35 national registries. The biobank contains whole blood, plasma, DNA and urine samples. Patients in the  
36  
37 intervention group will be recruited over 3 years, with clinical examinations at baseline and after 2, 4 and  
38  
39 10 years. The project timeline is shown in Figure 1.  
40  
41

42  
43 The project builds on the concept of shared care, where specialist knowledge is expanded into the primary  
44  
45 care sector. For GPs participating in the study, specialist input regarding the patients phenotype and the  
46  
47 recommended individualized treatment hereof will be delivered electronically to each patient's electronic  
48  
49 health record (EHR) at initiation and regularly during the study. Specialist counselling is also available by  
50  
51 phone during the day.  
52  
53

### 54 **Patients and Recruitment**

Manuscript ID bmjopen-2017-017493

Revised version 04-09-2017 without highlight of changes

1  
2  
3  
4 A flowchart of GPs participating in DD2 and IDA is provided in Figure 2. Patients in the intervention group  
5  
6 will be recruited from GPs in the region of southern Denmark and the region of Zealand participating in  
7  
8 both the DD2 cohort and the IDA study. Patients in the control group will be recruited from GPs  
9  
10 participating in the DD2 cohort but not in the IDA study. The selection process for patients in the two  
11  
12 groups will be different and adjustment for differences in prognostic factors at baseline is therefore  
13  
14 warranted as described in the statistical section.  
15  
16

### 17 18 *Intervention patients*

19  
20 A flowchart of recruitment is provided in Figure 3A. Participating IDA GPs will be responsible for the initial  
21  
22 patient contact, including collection of brief general patient information. If a DD2 patient is interested in  
23  
24 the study, the GP automatically will register the patient in the DD2 website, triggering contact by a study  
25  
26 nurse who will give the patient detailed study information. This will occur either by phone or during an  
27  
28 initial informational meeting. Collection of in-depth patient information, informed consent, and additional  
29  
30 screening will take place at central study hospitals prior to the baseline examination.  
31  
32

33  
34 The following patient inclusion criteria will be used:  
35

- 36  
37 1. Member of the DD2 cohort [42]
- 38  
39 2. Patient at a GP participating in the IDA study
- 40  
41 3. Not diagnosed with Type 1 Diabetes, defined as age <30 years at DD2 enrollment, fasting C-  
42  
43 peptide <300pM, and Gad65-ab >20IU/ml (see below)
- 44  
45 4. Life expectancy above 2 years
- 46  
47 5. No participation in other clinical trials
- 48  
49 6. Willing to provide written informed consent
- 50  
51

### 52 53 *Control patients*

54  
55  
56  
57  
58  
59  
60

Manuscript ID bmjopen-2017-017493

Revised version 04-09-2017 without highlight of changes

1  
2  
3  
4 Patients for the control group will be recruited from DD2 clinics throughout Denmark not participating in  
5  
6 the IDA study (Figure 2). Availability of valid biobanked samples for measuring GAD-ab, P-glucose, and C-  
7  
8 peptide will be required to join the control group. As the control group will be created within DD2, neither  
9  
10 GP nor patient will be informed, ensuring that the control group is truly blinded.

#### 11 12 13 **Patient examination in the intervention group**

14  
15  
16 *Screening* will take place at the following four central study sites: Odense University Hospital, Hospital of  
17  
18 Southwest Denmark, Næstved Lægecenter, and Holbæk Hospital. A written informed consent will be signed  
19  
20 at the baseline visit prior to initiating examination of study participants.

21  
22  
23 *Phenotype evaluation* will be performed at the central sites at baseline and after 24 and 48 months.

24  
25  
26 Medical history, medication use, and measures used in the phenotype evaluation will be obtained from the  
27  
28 patient. Fasting plasma glucose, GAD65-antibody, and fasting C-peptide will be ascertained from the DD2  
29  
30 database. Repeat measures of cardiac impedance and unobserved automated blood pressure will be taken  
31  
32 at the central sites at the following time points, determined by prior blood pressure values:

- 33  
34  
35 1)  $BP \leq 135/85$ : impedance measurement repeated after 24 months,  
36  
37 2)  $135/85 < BP \leq 145/95$ : impedance measurement repeated after 12 and 24 months,  
38  
39 3)  $BP > 145/95$ : impedance measurement repeated after 6, 12 and 24 months.

40  
41  
42 The results of the phenotype evaluation for each specific patient will be assessed at Odense University  
43  
44 Hospital and the patient specific protocol recommendations sent to the patient's general practitioner via  
45  
46 the electronic health record.

47  
48  
49 *Treatment and implementation of the phenotype evaluation* will take place at the GP's office every third  
50  
51 month or at the discretion of the GP (Figure 3B). The GP will measure HbA1c, the lipid profile, the albumin  
52  
53 creatinine-ratio, creatinine, and BMI annually. The GP will report treatment goals and any reasons for  
54  
55 protocol deviations annually.  
56  
57  
58  
59  
60



Manuscript ID bmjopen-2017-017493

Revised version 04-09-2017 without highlight of changes

### Daily physical activity

To measure daily physical activity level, a Axivity AX3 accelerometer (Axivity, Newcastle, UK) will be taped on the thigh and on the lower back. The AX3 is a 11g and 23x32.5x7.6 mm weatherproof accelerometer with a 512MB internal memory and clock. Accelerometers will be fixed directly on the skin using waterproof taping. Subjects will be instructed to wear the accelerometers at all times (including water activities and sleep) during a 10-day period and additional tape will be provided to patients at examination. The accelerometer on the back will be placed on the right side, above the upper point of the posterior iliac crest and next to the spine with its positive x-axis pointing downward and its negative z-axis pointing forward. The accelerometer on the thigh will be placed on the medial front of the right thigh, midway between the hip and knee joints, with its positive x-axis pointing downward and its negative z-axis pointing forward [43]. A sampling rate of 50 Hz will be used and data stored in in the original cwa Axivity file format, but also converted into a binary gt3x compatible file format using a custom made add-on to OmGui Axivity software. Accelerometer wear time has recently been reported to be high [44]. Patients will be closely instructed how to re-attach the accelerometer in case it falls off.

### Cardiovascular surrogate markers

Patients with clinically diagnosed T2D within 2 years of their baseline examination will be invited to participate in additional evaluation of the following cardiovascular surrogate markers:

1) *24-hour ambulatory blood pressure monitoring (24ABPM)*

24ABPM will be implemented by means of brachial oscillometric measurements, using the Mobil-O-Graph® system (IEM GmbH, Stolberg, Germany). The device will be set to measure BP every 15 minutes during the day (0700-2300 hours) and every 30 minutes during the night (2300-0700 hours). The patient will be instructed to record when s/he went to bed and got up.

Manuscript ID bmjopen-2017-017493

Revised version 04-09-2017 without highlight of changes

1  
2  
3  
4  
5  
6 2) *Skin auto fluorescence (SAF) to evaluate advanced glycosolated end-products*  
7

8 SAF will be measured using the AGE Reader™ (DiagnOptics Technologies BV, Groningen, the  
9 Netherlands). Technical details of this non-invasive device have previously been described in  
10 detail,[45].  
11  
12  
13

14  
15  
16  
17 3) *Low-dose non-contrast CT scan to detect coronary artery calcification*  
18

19 The atherosclerotic plaque burden in the coronary, carotide, aortic, and femoral arteries will be  
20 estimated by measuring calcium during a 64-slice CT scan (Discovery VCT; GE Healthcare,  
21 Milwaukee, WI, USA) conducted at Odense University Hospital. The scan will be performed with the  
22 following parameters: gantry rotation time 500 ms, 16 · 2.5mm collimation, 120 kV tube voltage,  
23 200 mA tube current and a prospectively EGC-triggered scan acquisition gating at 50% of the R–R  
24 interval. Scan data will be acquired during an inspiratory breath hold. The CAC Agatston score is  
25 computed by summing the CAC scores of all foci in the epicardial coronary system.  
26  
27  
28  
29  
30  
31  
32  
33  
34  
35  
36

37 4) *Ultrasound of the carotid arteries to evaluate intima media thickness (IMT) and plaques*  
38

39 IMT will be measured by B-mode ultrasound (Model IE33, Koninklijke Philips Electronics N.V,  
40 Eindhoven, The Netherlands), using a linear array transducer (L11-3 with a frequency up to 11  
41 MHz), with acquisition of multi-insonation angles for subsequent analysis with automated  
42 edge detection software according to current guidelines,[46].  
43  
44  
45  
46  
47  
48  
49

50 5) *ECG for approximation of left ventricular hypertrophy*  
51

52 ECG will be measured digitally (EC Sense Lexor, Cardiolex AB, Solna, Sweden). The following  
53 measures of LVH will be calculated:  
54  
55  
56  
57  
58  
59  
60

Manuscript ID bmjopen-2017-017493

Revised version 04-09-2017 without highlight of changes

- Cornell voltage-duration product, defined as the sum of voltage of SV3 and RaVL multiplied by QRS duration (in women 0.6mV is added to the voltage)
- Sokolow-lyon voltage, defined as the sum of SV1 and R in V5 or V6, depending on which is larger.

6) *Fundus photo to evaluate retinal vascular changes*

Retinal vascular changes will be assessed through retinal imaging. Two methods will be employed to assess diabetic retinopathy and vascular damage:

- Diabetic retinopathy will be graded using the Early Treatment of Diabetic Retinopathy Study (ETDRS) classification,[47]. Grading is performed in 7 standard fields. The assessed characteristics are graded in specific fields and/or multiple fields. The grading encompasses the following characteristics: microaneurysm, hemorrhages, hard exudates, soft exudates, intraretinal microvascular abnormalities, venous abnormalities, new vessels on disc or elsewhere, preretinal hemorrhage, vitreous hemorrhage, scars of prior photocoagulation, and clinically significant macular edema.
- The retinal arteriolar and venular caliber as described by Hubbard *et al.*[48] All venules and arterioles in the area half to one disc diameter from the disc margin of the diameter are measured and an averaged measure is derived. The ratio of the venular and arteriolar diameters also is derived.
- Retinal photos will be taken after dilation of both eyes with 1 drop 10% metaoxedrin and mydriacyl 5mg/ml. After 10 min this will be repeated. After a total of 20 minutes, six pictures will be taken of each eye.  
  
All photographs will be assessed for retinopathy locally as part of the patients' regular screening. Trained ophthalmologists at the Department of Ophthalmology, Odense University Hospital then will assess retinopathy with the methods described above.

Surrogate marker evaluation will take place at baseline and again at two and four years follow-up.

Manuscript ID bmjopen-2017-017493

Revised version 04-09-2017 without highlight of changes

## Study interventions

Patients in the control group will not receive study-related interventions, but rather will be treated by their GP according to national guidelines. Patients in the intervention group will receive multifactorial individualized treatment as outlined below. The outline of treatment will be subject to revision during the study if substantial new clinical evidence emerges. The suggested individualized treatment in the intervention group is made available to the treating GP, but the actual treatment is chosen at the discretion of the GP together with the patient. The intervention is designed to mimic the actual real life effect of specialist treatment suggestions. Patients who do not follow the proposed algorithms are therefore not discontinued.

### Anti-diabetic treatment based on pathophysiological phenotypes

Pathophysiological phenotyping will provide the basis for individually guided treatment. At inclusion patients with “other specific forms of diabetes” will be identified. The remaining classical WHO-defined T2D patients will be characterized according to their insulin sensitivity (IS) and beta cell function (BCF). Of note, the subphenotyping and treatment of WHO-defined T2D patients is constructed for patients of Caucasian inheritance (very few Danish citizens are non-Caucasian) and cannot readily be extrapolated to other ethnicities.

Other specific types of diabetes are defined as follows:

- 1) Maturity-onset diabetes of the young (MODY). Patients will be screened for 10 monogenic causes of diabetes.
- 2) Late autoimmune diabetes of the adult (LADA). Defined as GAD65-ab $\geq$ 20 IU/ml.
- 3) Secondary diabetes. Defined as low BCF (HOMA2-beta < 115.3%) and a history of pancreatitis or pancreas resection.

Manuscript ID bmjopen-2017-017493

Revised version 04-09-2017 without highlight of changes

- 1  
2  
3  
4 4) Steroid-associated diabetes, defined as use of oral glucocorticosteroids within 3 months of  
5  
6 diabetes diagnosis. Genuine-steroid induced diabetes is present when it is known with certainty  
7  
8 that diabetes was not present in the 3 months prior to steroid initiation. Patients with known prior  
9  
10 T2D or with uncertainty about the timing of diabetes onset and steroid use will be allocated to one  
11  
12 of the additional phenotypes described below.  
13

14  
15  
16 Genuine WHO-defined T2D:

- 17  
18 5) Insulinopenic T2D. Defined as low BCF (HOMA2-beta < 115.3%) and high IS (HOMA2-S ≥ 63.5 %)  
19  
20 6) Classical T2D. Defined as low BCF (HOMA2-beta < 115.3%) and low IS (HOMA2-S < 63.5 %)  
21  
22 7) Hyperinsulinemic T2D. Defined as high BCF (HOMA2-beta ≥ 115.3%) and low IS (HOMA2-S < 63.5 %)  
23  
24  
25

26 The classification is hierarchical. The phenotypes have been described previously [25]. BCF and IS will be  
27  
28 assessed using the HOMA2 model, calculated based upon fasting C-peptide and fasting plasma glucose.  
29  
30 HOMA2-beta is an estimate of the beta-cell function and HOMA2-S is an estimate of the IS. In a healthy  
31  
32 population without diabetes or impaired glucose tolerance, median HOMA2-beta was found to be 115.3%  
33  
34 and median HOMA2-S was 63.5%. In the study population, values of HOMA2-beta or HOMA2-S above these  
35  
36 medians will be defined as “high”, while values below the median will be defined as “low”.  
37  
38

39 Proposed treatment strategies in the study according to diabetes phenotypes are as follows. The treatment  
40  
41 proposed for each phenotype is additive, starting with A. B is added if the treatment goal is not reached,  
42  
43 and so on.  
44  
45

- 46  
47 1) MODY. (1) Types 1 and 3 MODY should be treated with glimepiride or repaglinid. (2) Type 2 MODY  
48  
49 should be treated with diet. Secondarily, basal insulin can be used. (3) Type 5 MODY should be  
50  
51 treated with basal insulin. (4) Rare types of MODY should be treated individually according to  
52  
53 specialist assessment.  
54  
55  
56  
57  
58  
59  
60

Manuscript ID bmjopen-2017-017493

Revised version 04-09-2017 without highlight of changes

1  
2  
3  
4 2) LADA.

5  
6 *In patients who have IS and BCF equivalent to insulinopenic and classic T2D:*

7  
8 A) Metformin if BMI>25 kg/m<sup>2</sup>. B) Basal insulin and meal-time insulin.

9  
10 *In patients who have IS and BCF equivalent to hyperinsulinemic T2D:*

11  
12 Treatment equivalent to hyperinsulinemic T2D (see below), with additional information on risk of  
13 rapid BCF deterioration and possible absolute need for insulin therapy.

14  
15  
16  
17 3) Secondary diabetes. Basal and meal-time insulin.

18  
19 4) Steroid associated diabetes. A) Meal-time insulin. B) Metformin. C) Basal insulin if fasting blood  
20 glucose is above 7.0.

21  
22 5) Insulinopenic T2D. A) Metformin. B) Basal insulin. C) Meal-time insulin.

23  
24  
25  
26 6) Classical T2D.

27  
28 *In patients without CVD:* A) Metformin. B) GLP-1 analogue\*. C) Basal insulin. D) Meal-time insulin.

29  
30 *In patients with former CVD:* A) Metformin. B) SGLT-2 inhibitor. C) GLP-1 analogue\*. D) Basal  
31 insulin. E) Meal-time insulin.

32  
33  
34 7) Hyperinsulinemic T2D. In patients with BMI>35 kg/m<sup>2</sup>, gastric bypass should be considered  
35 according to current national criteria and patient preference. Pharmacological treatment:

36  
37 *In patients without CVD:* A) Metformin. B) GLP-1 analogue\*. C) Pioglitazone. D) Basal insulin. E)  
38 Meal-time insulin.

39  
40  
41 *In patients with former CVD:* A) Metformin. B) SGLT-2 inhibitor. C) GLP-1 analogue\*. D)  
42 Pioglitazone. E) Basal insulin. F) Meal-time insulin.

43  
44  
45  
46  
47  
48 Pioglitazone is not recommended for patients with heart failure, prior bladder cancer or known  
49 osteoporosis. If marked edema develops discontinuation of pioglitazone must be considered. Women  
50 should be informed about the increased risk of fractures with pioglitazone, alongside the reduced  
51 cardiovascular risk.  
52  
53  
54  
55  
56  
57  
58  
59  
60

Manuscript ID bmjopen-2017-017493

Revised version 04-09-2017 without highlight of changes

\*DDP-4 inhibitors can be used if the patient does not want a GLP-1 analogue. It is recommended that a DDP-4 inhibitor be discontinued if insulin is initiated.

In patients of Asian inheritance with WHO-defined T2D, incretin-based treatment can be considered as first-line treatment [49]. Type of drug within drug classes, dosing, and titration will be chosen at the discretion of the treating physician. Suggestive algorithms will be available to the physicians.

Treatment of hyperglycemia will proceed according to the following individual goals:

- 1) Optimal control of HbA1c < 48 mmol/mol;
- 2) Acceptable control of HbA1c < 58 mmol/mol; or
- 3) Free of symptoms, with best possible HbA1c achieved within this constraint.

All treatment algorithms will be applied according to these predetermined goals. GPs will be free to choose and reassess the goal applicable to an individual patient. In patients with neuropathy or pre-existing cardiovascular disease, careful goal assessment is needed. If a patient has a severe hypoglycemic event, has repeated measures of blood glucose below 4.0 mmol/l, or is therapy resistant, the goal should be reassessed. For an in-depth discussion of the motivation for the glucose-lowering algorithm we refer to the supplemental material.

#### Anti-hypertensive treatment

Treatment of hypertension will be guided by measurements of thoracic impedance, which provide estimates of vascular resistance, intravascular volume, and cardiac inotropy. These measurements will be used to guide the pharmacological treatment of arterial hypertension. Principles of drug class choice will be as follows:

- 1) When hypertension or microalbuminuria are present, patients should be treated with an ace-inhibitor (or a angiotensin-2-antagonist), regardless of the result of the impedance measurement.

Manuscript ID bmjopen-2017-017493

Revised version 04-09-2017 without highlight of changes

- 2) High vascular resistance, as the only abnormal impedance measure, should be treated with a calcium-channel antagonist (dihydropyridins) (CCBs) in addition to an ace-inhibitor.
- 3) High intravascular volume, as the only abnormal impedance measure, should be treated with a thiazide in addition to current anti-hypertensive treatment. If the patient already is receiving a thiazide in maximum dose, an aldosterone receptor antagonist should be added.
- 4) In cases of high vascular resistance and high intravascular volume (more than double the vascular resistance in relative terms), diuretics (thiazide or secondarily aldosterone receptor antagonist) should be increased, comparable to the maximum dose of one new drug. As a next step, a CCB should be added. Finally, an aldosterone receptor antagonist should be increased to its maximum dose.
- 5) In cases of high vascular resistance and high intravascular volume (but less than double the vascular resistance in relative terms), an ACE inhibitor or CCB should be added, depending on initial treatment. As a second measure, diuretics (thiazide or, less often, an aldosterone receptor antagonist) should be increased comparable to the maximum dose of one new drug. As a third measure, CCB should be titrated to its maximum dose. Finally, an aldosterone receptor antagonist can be increased to its maximum dose.
- 6) High inotropy is addressed only when the patient receives an ACE-inhibitor, thiazide, and CCB and the impedance measurement is made while the patient is receiving this treatment. Other abnormalities need to be addressed first. Carvedilol up to 50mg is recommended.

The maximum dose of bendroflumethiazide is considered to be 5.0 mg, that for hydrochlorthiazide is 50 mg, and that for spironolactone is 50 mg. In cases in which the eGFR is below 30 mL/min/1.73m<sup>2</sup>, high ceiling diuretics are substituted for thiazides. Non-hypertensive indications for anti-hypertensive medication overrule this algorithm.



Manuscript ID bmjopen-2017-017493

Revised version 04-09-2017 without highlight of changes

1  
2  
3  
4 Impedance measurements also are used to downgrade anti-hypertensive treatment, in the following  
5  
6 situations:

- 9 1) When inotropy is decreased, beta-blockers are terminated, or the dose reduced.
- 10 2) When hypovolemia is present, diuretics are terminated or the dose reduced.
- 11 3) When inotropy is decreased, vascular resistance is normal, and blood pressure is regulated, CCBs  
12  
13 can be reduced or terminated.  
14  
15  
16

17  
18 For patients with prior cardiovascular disease, chronic kidney disease (eGFR<60 mL/min/1,73 m<sup>2</sup>) or  
19 albuminuria, the goal of anti-hypertensive treatment will be to achieve a blood pressure <130/80 mmHg on  
20 3 drugs, measured as home blood pressure or with an automated blood pressure device. For other  
21 patients, the goal is blood pressure<135/80 mmHg on 3 drugs. In cases in which control of blood pressure is  
22 not achieved with 3 anti-hypertensive drugs, the patient will be referred to a specialist clinic. Blood  
23 pressure below 120/70 mmHg should be avoided, if necessary by means of down-titration, unless other  
24 considerations are present.  
25  
26  
27  
28  
29  
30  
31  
32

33  
34 Hypertension at study inclusion will be defined by presence of anti-hypertensive treatment or a blood  
35 pressure measurement above or equal to 135/80 mmhg in the office under standardized conditions using  
36 an automated blood pressure device (Mobilograf).  
37  
38  
39  
40

#### 41 Treatment of dyslipidemia

42  
43 Treatment with atorvastatin or simvastatin 40 mg will be recommended for all patients, regardless of LDL-  
44 C. If the treatment goal is not met, atorvastatin 80 mg or rosuvastatin 40 mg will be recommended.  
45  
46 Combining lipid-lowering drugs will not be recommended. The treatment goal will be LDL cholesterol  
47 ≤2.5mM and LDL cholesterol ≤2.0mM in patients with established cardiovascular disease.  
48  
49  
50  
51  
52

#### 53 Termination of inefficient medication

Manuscript ID bmjopen-2017-017493

Revised version 04-09-2017 without highlight of changes

The effect of a specific anti-diabetic, antihypertensive, or cholesterol-lowering treatment will be measured.

The following efficacy requirements after titration to the full tolerable dose will need to be met:

- 1) Decline in Hba1c exceeding 0.5 % within 3 months.
- 2) Decline in systolic blood pressure exceeding 5 mmHg within 1 month.
- 3) Decline in LDL-cholesterol exceeding 0.5 mM within 1 month.

If the target is not met, the specific treatment should be terminated and replaced by another drug according to the algorithm. The missing effect on blood pressure should be validated by home blood pressure measurements according to national guidelines. For anti-hypertensive medication, another drug within the same class can be tried.

#### Lifestyle interventions

Supportive individualized M-health initiatives and face-to-face consultations for promoting changes in lifestyle will be used in this study. The aim is to empower patients to achieve sustainable reductions in carbohydrate intake and increase the daily physical activity level.

In the current study, we will integrate dietician-supported self-management by using a commercially Internet platform (Liva) to facilitate interactive communication between dieticians and users, as well as by peer-to-peer support. The platform will be further developed to support individualized education, goal setting and evaluation of diet and exercise behavior as described below. In addition, interactive communication between patient and a personal healthcare professional will allow for asynchronous contact when needed, in the form of video, text, or spoken messages. The advanced interactive platforms will be supported further by an individualized number of face-to-face consultations between the patient and the personal healthcare professional, with whom the patient will be acquainted from the interactive platform.

Manuscript ID bmjopen-2017-017493

Revised version 04-09-2017 without highlight of changes

1  
2  
3  
4 The current study aims to empower patients to decrease the amount of carbohydrates in their diet (40E%  
5 fat, 40E% carbohydrates, and 20E% proteins), while keeping energy intake unchanged or slightly decreased  
6 in cases in which the patient seeks weight reduction. We will support individualized changes towards a  
7 sustainable increased number of low-carb meals each week. To support these changes, we have designed  
8 an Internet and smartphone platform ([www.dd2mad.dk](http://www.dd2mad.dk)) that easily allows individuals to plan, purchase  
9 groceries, and cook low-carb meals for all daily meals, including snacks. A dietician developed the recipes,  
10 and the macro-nutritional composition of each recipe has been calculated using “DANKOST” software  
11 (Dankost Aps, Copenhagen, DK). The platform is updated monthly with new recipes and will be developed  
12 further using a user-driven iterative process. We will implement this platform in the modified Liva.  
13  
14  
15  
16  
17  
18  
19  
20  
21  
22  
23

24 We aim to empower patients to make a sustainable increase in physical activity level by implementing  
25 interval walking. To enable the patients to engage in and maintain correct individualized interval walking  
26 we have developed a smartphone application (InterWalk). The application is designed to individually guide  
27 duration and intensity of the training in real time based on a small test at the first use of the application.  
28 During use, the app automatically monitors exercise intensity, training duration, and walking distance.  
29 Following each training session, the app sends the data to a central server [50]. The training data will be  
30 available for the patient and the healthcare professionals making it possible to provide evidence-based  
31 training feedback to patients, using physical fitness data [51], training duration, and compliance from the  
32 App [50]. The InterWalk App will be implemented in the Liva platform. For a discussion of the motivation of  
33 the lifestyle intervention see the supplemental material.  
34  
35  
36  
37  
38  
39  
40  
41  
42  
43  
44  
45

#### 46 **Outcomes**

47  
48  
49 The study's primary outcome measure is time to a composite outcome of all-cause mortality, non-fatal  
50 myocardial infarction, coronary revascularization, cardiac arrest with resuscitation, hospitalization for heart  
51 failure, non-fatal stroke, development or progression of nephropathy or retinopathy (see below), severe  
52 hypoglycemia leading to hospitalization, and development of any cancer (except basocellular carcinoma) .  
53  
54  
55  
56  
57  
58  
59  
60

Manuscript ID bmjopen-2017-017493

Revised version 04-09-2017 without highlight of changes

Development or progression of nephropathy is defined as renal failure (defined by the need for chronic dialysis), development of macroalbuminuria, or doubling of baseline s-creatinine to a level above 200µM.

Development of retinopathy is defined as proliferative retinopathy or macular edema that requires laser therapy, injection of vascular endothelial growth factor inhibitors or vitrectomy, or diabetes-related blindness (Snellen visual acuity below 0.1). Information on deaths will be obtained from the Civil Registration System. Individual diagnoses, operations, and procedure codes will be obtained from the Danish National Patient Registry (See Table 2). S-creatinine values and albumin-creatinine-ratios will be obtained through the Danish Diabetes Database for Adults.

Secondary outcome measures are all-cause mortality, socioeconomic costs, and quality of life. Quality of life will be assessed with SF-12 and Q-5 questionnaires at study inclusion and after 2 and 4 years.

Tertiary outcome measures are the individual endpoints in the composite endpoint. Other endpoints are

- 1) time to any macrovascular endpoint (as defined in the primary endpoint)
- 2) time to any microvascular endpoint (as defined in the primary endpoint)
- 3) time to fatal acute myocardial infarction
- 4) time to fatal stroke
- 5) time to lower-limb amputation
- 6) time to other revascularization procedures and peripheral thrombosis (not cardiac or cerebrovascular events)
- 7) overall hospitalizations per 1000 patient-years
- 8) treatment adherence, defined as reimbursement of prescriptions, compared to intended treatment dose: Total yearly reimbursed doses vs. intended yearly doses.
- 9) time trends of HbA1c, blood pressure, and LDL cholesterol
- 10) individual time trends of daily physical activity in intervention patients
- 11) proportions of patients in the interventions group reaching their goal of HbA1c and blood pressure

Manuscript ID bmjopen-2017-017493

Revised version 04-09-2017 without highlight of changes

1  
2  
3  
4 Cause of death will be obtained from the Danish Cause of Death Register. Reimbursement of prescriptions  
5  
6 will be ascertained through the Danish National Prescription Registry. Intended treatment dose will be  
7  
8 obtained through the electronic medicine chart "FMK".  
9

### 10 11 **Power calculations**

12  
13  
14 The power calculation was performed using Lakatos normal approximation for a log-rank test of two  
15  
16 survival curves. The estimated sample size of 1123 patients will have 80% power to detect a reduction of  
17  
18 20% of the incidence rate of the primary endpoint, with a type 1 error of 5%, during 10 years of follow-up.  
19  
20 A composite yearly event rate of 5% is estimated, based on estimated incidence rates of 2.5% per year of  
21  
22 macro- and microvascular complications, 1.5% per year for cancer, and approximately 1% for overall  
23  
24 mortality. The hypoglycemic event rate is expected to be less than 0.4%. Due to the database approach,  
25  
26 loss to follow-up should be minimal.  
27  
28  
29

### 30 31 **Statistical analysis**

32  
33 The advantage of our pragmatic study approach is that our results will reflect effectiveness, harms and  
34  
35 costs of individualized treatment in daily practice in primary care, improving generalizability compared to  
36  
37 single-exposure RCTs typically conducted among heavily selected patient and clinic populations. On the  
38  
39 other hand, GP practices and their patients are self-selected to participating in the IDA intervention in our  
40  
41 study, and will be non-blinded to receiving this treatment. The main methodological challenge for our  
42  
43 proposed study will therefore be to address possible confounding caused by imbalance of prognostic  
44  
45 factors in participants versus controls. We will use appropriate statistical methods for dealing with  
46  
47 confounding, including regression analyses and propensity score matching.  
48  
49  
50

### 51 52 **Confounders**

53  
54 Covariates expected to be confounders will be selected according to available evidence and knowledge,  
55  
56 and will include the following:  
57  
58  
59  
60

Manuscript ID bmjopen-2017-017493

Revised version 04-09-2017 without highlight of changes

- 1) *General variables*: Age, gender, diabetes onset, DD2 enrollment year, time from DD2 enrollment to IDA study entry, GP and place of residence (municipality)
- 2) *Lifestyle variables*: Smoking, alcohol consumption, physical exercise (self-reported)
- 3) *Comorbidity*: Each of the individual strata of the Charlson Comorbidity Index, except diabetes, hospitalization for hypoglycemia, chronic dialysis, laser treatment of retinopathy/maculopathy, vitrectomy, chronic heart disease, angina pectoris, any revascularization procedure, lower-extremity amputation, atrial fibrillation and history of psychiatric disease (8 covariates defined by ICD-10: DF1 to DF8)
- 4) *Socioeconomic variables*: Education, employment, income, social support
- 5) *Clinical variables*: Blood pressure, BMI, waist circumference, LDL-C, HDL-C, triglyceride level, creatinine level, urine albumin creatinine ratio, diabetes phenotype
- 6) *Medication use*: Aspirin, statins, anti-coagulating drugs, thiazides, ACE-inhibitors or angiotensin 2 antagonists, calcium channel antagonists, beta-blockers, potassium-sparing diuretics, metformin, sulfonylurea, DD4-inhibitors, GLP-1 analogues, SGLT-2 inhibitors, insulin, oral corticosteroids, and number of redeemed drugs (including the above drugs)

Ascertainment of confounder variables will be through the DD2 cohort and registries. Comorbidity is defined as all diagnoses registered from 1977 until enrollment. Socioeconomic variables are defined as the values recorded in the enrollment year. Medication use is defined as redeemed prescriptions 1 year prior to enrollment. Clinical variables are defined by the value measured closest to enrollment, no more than 1 year prior to enrollment and 1 month after enrollment.

### **Cox regression analysis**

Follow up will extend for 10 years from the date of IDA intervention start until first of any of the individual composite outcome events, emigration out of Denmark, or end of study 1. January 2028, whichever comes

Manuscript ID bmjopen-2017-017493

Revised version 04-09-2017 without highlight of changes

1  
2  
3  
4 first. For patients in the control group the entry date will be the date of DD2 enrollment or date of the  
5  
6 overall IDA study initiation 1.January 2015, whichever comes last. We will construct survival curves for  
7  
8 intervention and control patients and compute cumulative incidence rates. We then compute incidence  
9  
10 rate ratios (IRRs) with 95% confidence intervals (CIs) for intervention patients compared with controls using  
11  
12 Cox regression analysis and controlling for confounders described above. Stratified analyses will be  
13  
14 performed by gender, age below/above 60 years, eGFR below/above 60, former CVD, and diabetes  
15  
16 phenotype with test for interaction.,.  
17  
18  
19  
20

### 21 **Propensity score analysis**

22  
23 In a second analysis, we will use propensity score matching. For this analysis, we will compute the  
24  
25 probability of each DD2 cohort non-IDA-intervention patient being included in the IDA intervention arm in a  
26  
27 logistic regression analysis, conditioned on the patient's covariate profile. Next, we will match each  
28  
29 intervention patient to a DD2 control patient with the closest propensity score in a 1:3 fashion and  
30  
31 eliminate the remaining controls. The matching will be performed in a random sequential order. After  
32  
33 determining that the covariates are balanced, between the two treatment groups (see supplemental  
34  
35 material), we will conduct a matched Cox regression analysis without further adjustment. If any covariate is  
36  
37 not balanced a model with adjustment for non-balanced covariates will be made. The assumption of  
38  
39 proportional hazards in the Cox models will be assessed graphically.  
40  
41  
42  
43  
44

### 45 **ETHICS AND DISSEMINATION**

46  
47  
48 The study will use well-known pharmacological agents and bariatric interventions. Thus the safety of the  
49  
50 patients is considered high. Patients in the intervention group will provide written informed consent before  
51  
52 participation. The study will be conducted in compliance with the principles set forth in the Declaration of  
53  
54 Helsinki and the Good Clinical Practice (GCP) Guidelines. The study has been approved by the Regional  
55  
56  
57  
58  
59  
60

Manuscript ID bmjopen-2017-017493

Revised version 04-09-2017 without highlight of changes

Committee on Medical Health Ethics (Region of Southern Denmark S-20120186), the Danish Data Protection Agency, and the Danish Health and Medicines Authority (journal nr. 2012120204).

All subjects will be identified by an unambiguous subject code that can be linked to the civil registration number. The subject code will be used as a pseudo-anonymization code throughout the study. Handwritten source data (CRFs) or hard-copy source data will be securely safeguarded against unauthorized access and kept under lock, with access only by authorized persons. Electronically reported source data will conform to good clinical practice standards by using the RedCap data collection system and the DD2-established data collection system. Both systems have a high level of security and use data verification and detailed logging during reporting.

Most study data will be stored in OPEN – a custom-designed study database secured against unauthorized access. OPEN is a research service provided by the University of Southern Denmark that enables researchers to store research data in accordance with national legislation and requirements for data logging, password security, and backup.

Study results will be made public via articles in national and international peer-reviewed journals, which will be accessible at [www.dd2.nu](http://www.dd2.nu). Positive, negative, and inconclusive results will be published according to the Vancouver Principles. The results will be disseminated through [www.clinicaltrials.com](http://www.clinicaltrials.com) and the Danish Diabetes Association.

#### **PERSPECTIVES**

IDA is one of the first studies to formalize a specific implementation of individualized medicine in treating T2D. The ultimate goal is to improve quality of life and reduce complications in T2D patients – in a manner requiring less medication and fewer resources over a 10 year period.



Manuscript ID bmjopen-2017-017493

Revised version 04-09-2017 without highlight of changes

### Competing interests statement

JEH is a member of the MSD and Boehringer National Advisory board. HBN has received personal lectures fees from Novo Nordisk, outside the submitted work. MHO has received a clinical research grant from the Novo Nordisk Foundation. The Department of Clinical Epidemiology, Aarhus University Hospital, receives funding for other studies from companies in the form of research grants to (and administered by) Aarhus University. None of those studies have any relation to the present study. All other authors declare no competing interests.

### Funding statement

The study was supported by The Danish Agency for Science (grant nos. 09-067009 and 09-075724), the Region of Southern Denmark, the Region of Zealand, the Augustinus Foundation, the Herta Christensen' Foundation, the Novo Nordisk Foundation, the University of Southern Denmark. The biobank was supported by a unrestricted donation from Novo Nordisk A/S. Project partners are listed on the project website, <https://DD2.nu>. The study sponsors had no role in study design, data collection, data analysis, data interpretation, or writing of the report. The corresponding author had full access to all the data in the study and had final responsibility for the decision to submit for publication.

### Authors' contributions

The study concept was developed by HBN and JEH. HBN, JEH, MHO, JVS, JSN, TBO, RWT and SF designed the study. Principal Manager of the DD2 study is JSN. JVS drafted the article and JSN, RWT, HBN and MHO revised the draft. All authors participated in the critical revision of the intellectual content of the report.

### Reference list

Manuscript ID bmjopen-2017-017493

Revised version 04-09-2017 without highlight of changes

1. Gæde P, Oellgaard J, Carstensen B, et al. Years of life gained by multifactorial intervention in patients with type 2 diabetes mellitus and microalbuminuria: 21 years follow-up on the Steno-2 randomised trial. *Diabetologia* 2016;1-10 doi: 10.1007/s00125-016-4065-6[published Online First: Epub Date]].
2. Gregg EW, Sattar N, Ali MK. The changing face of diabetes complications. *The Lancet. Diabetes & endocrinology* 2016;**4**(6):537-47 doi: 10.1016/s2213-8587(16)30010-9[published Online First: Epub Date]].
3. Færch K, Carstensen B, Almdal TP, Jørgensen ME. Improved Survival Among Patients With Complicated Type 2 Diabetes in Denmark: A Prospective Study (2002–2010). *The Journal of Clinical Endocrinology & Metabolism* 2014;**99**(4):E642-E46 doi: doi:10.1210/jc.2013-3210[published Online First: Epub Date]].
4. Coutinho M, Gerstein HC, Wang Y, Yusuf S. The relationship between glucose and incident cardiovascular events. A meta-regression analysis of published data from 20 studies of 95,783 individuals followed for 12.4 years. *Diabetes care* 1999;**22**(2):233-40
5. Currie CJ, Peters JR, Tynan A, et al. Survival as a function of HbA(1c) in people with type 2 diabetes: a retrospective cohort study. *Lancet* 2010;**375**(9713):481-9 doi: 10.1016/S0140-6736(09)61969-3[published Online First: Epub Date]].
6. Gerstein HC, Miller ME, Byington RP, et al. Effects of intensive glucose lowering in type 2 diabetes. *The New England journal of medicine* 2008;**358**(24):2545-59 doi: 10.1056/NEJMoa0802743[published Online First: Epub Date]].
7. Patel A, MacMahon S, Chalmers J, et al. Intensive blood glucose control and vascular outcomes in patients with type 2 diabetes. *The New England journal of medicine* 2008;**358**(24):2560-72 doi: 10.1056/NEJMoa0802987[published Online First: Epub Date]].
8. Duckworth W, Abraira C, Moritz T, et al. Glucose control and vascular complications in veterans with type 2 diabetes. *The New England journal of medicine* 2009;**360**(2):129-39 doi: 10.1056/NEJMoa0808431[published Online First: Epub Date]].
9. Boussageon R, Bejan-Angoulvant T, Saadatian-Elahi M, et al. Effect of intensive glucose lowering treatment on all cause mortality, cardiovascular death, and microvascular events in type 2 diabetes: meta-analysis of randomised controlled trials. *BMJ* 2011;**343**:d4169 doi: 10.1136/bmj.d4169[published Online First: Epub Date]].
10. Seidu S, Achana FA, Gray LJ, Davies MJ, Khunti K. Effects of glucose-lowering and multifactorial interventions on cardiovascular and mortality outcomes: a meta-analysis of randomized control trials. *Diabetic medicine : a journal of the British Diabetic Association* 2016;**33**(3):280-9 doi: 10.1111/dme.12885[published Online First: Epub Date]].
11. Effect of intensive blood-glucose control with metformin on complications in overweight patients with type 2 diabetes (UKPDS 34). UK Prospective Diabetes Study (UKPDS) Group. *Lancet* 1998;**352**(9131):854-65
12. Intensive blood-glucose control with sulphonylureas or insulin compared with conventional treatment and risk of complications in patients with type 2 diabetes (UKPDS 33). UK Prospective Diabetes Study (UKPDS) Group. *Lancet* 1998;**352**(9131):837-53
13. Holman RR, Paul SK, Bethel MA, Matthews DR, Neil HA. 10-year follow-up of intensive glucose control in type 2 diabetes. *The New England journal of medicine* 2008;**359**(15):1577-89 doi: 10.1056/NEJMoa0806470[published Online First: Epub Date]].
14. Svensson E, Baggesen LM, Johnsen SP, et al. Early Glycemic Control and Magnitude of HbA1c Reduction Predict Cardiovascular Events and Mortality: Population-Based Cohort Study of 24,752 Metformin Initiators. 2017;**40**(6):800-07 doi: 10.2337/dc16-2271[published Online First: Epub Date]].
15. Gerstein HC, Miller ME, Genuth S, et al. Long-term effects of intensive glucose lowering on cardiovascular outcomes. *The New England journal of medicine* 2011;**364**(9):818-28 doi: 10.1056/NEJMoa1006524[published Online First: Epub Date]].

Manuscript ID bmjopen-2017-017493

Revised version 04-09-2017 without highlight of changes

16. Zoungas S, Patel A, Chalmers J, et al. Severe hypoglycemia and risks of vascular events and death. *The New England journal of medicine* 2010;**363**(15):1410-8 doi: 10.1056/NEJMoa1003795[published Online First: Epub Date]].
17. American Diabetes A. Standards of Medical Care in Diabetes 2017. *Diabetes Care* 2017;**40**(Suppl. 1)
18. Noto H, Tsujimoto T, Sasazuki T, Noda M. Significantly increased risk of cancer in patients with diabetes mellitus: a systematic review and meta-analysis. *Endocrine practice : official journal of the American College of Endocrinology and the American Association of Clinical Endocrinologists* 2011;**17**(4):616-28 doi: 10.4158/ep10357.ra[published Online First: Epub Date]].
19. Shikata K, Ninomiya T, Kiyohara Y. Diabetes mellitus and cancer risk: review of the epidemiological evidence. *Cancer science* 2013;**104**(1):9-14 doi: 10.1111/cas.12043[published Online First: Epub Date]].
20. Campbell PT, Newton CC, Patel AV, Jacobs EJ, Gapstur SM. Diabetes and cause-specific mortality in a prospective cohort of one million U.S. adults. *Diabetes care* 2012;**35**(9):1835-44 doi: 10.2337/dc12-0002[published Online First: Epub Date]].
21. Wu L, Zhu J, Prokop LJ, Murad MH. Pharmacologic Therapy of Diabetes and Overall Cancer Risk and Mortality: A Meta-Analysis of 265 Studies. *Scientific reports* 2015;**5**:10147 doi: 10.1038/srep10147[published Online First: Epub Date]].
22. Report of the expert committee on the diagnosis and classification of diabetes mellitus. *Diabetes care* 2003;**26** Suppl 1:S5-20
23. Tuomi T, Santoro N, Caprio S, Cai M, Weng J, Groop L. The many faces of diabetes: a disease with increasing heterogeneity. *Lancet* 2014;**383**(9922):1084-94 doi: 10.1016/s0140-6736(13)62219-9[published Online First: Epub Date]].
24. Diagnosis and classification of diabetes mellitus. *Diabetes care* 2014;**37** Suppl 1:S81-90 doi: 10.2337/dc14-S081[published Online First: Epub Date]].
25. Stidsen JV, Thomsen RW, Nielsen JS, et al. Pathophysiological Phenotypes of Clinically Diagnosed Type 2 Diabetes. Abstracts of the 74th Scientific Sessions of the American Diabetes Association, June 13-17, 2014, San Francisco, California. . *Diabetes* 2014;**63** Suppl 1:A354-55
26. Kodama K, Tojjar D, Yamada S, Toda K, Patel CJ, Butte AJ. Ethnic differences in the relationship between insulin sensitivity and insulin response: a systematic review and meta-analysis. *Diabetes care* 2013;**36**(6):1789-96 doi: 10.2337/dc12-1235[published Online First: Epub Date]].
27. Yabe D, Seino Y. Type 2 diabetes via beta-cell dysfunction in east Asian people. *The lancet. Diabetes & endocrinology* 2016;**4**(1):2-3 doi: 10.1016/s2213-8587(15)00389-7[published Online First: Epub Date]].
28. Stamler J, Vaccaro O, Neaton JD, Wentworth D. Diabetes, other risk factors, and 12-yr cardiovascular mortality for men screened in the Multiple Risk Factor Intervention Trial. *Diabetes care* 1993;**16**(2):434-44
29. Brunstrom M, Carlberg B. Effect of antihypertensive treatment at different blood pressure levels in patients with diabetes mellitus: systematic review and meta-analyses. *Bmj* 2016;**352**:i717 doi: 10.1136/bmj.i717[published Online First: Epub Date]].
30. Mancia G, Fagard R, Narkiewicz K, et al. 2013 ESH/ESC Practice Guidelines for the Management of Arterial Hypertension. *Blood pressure* 2014;**23**(1):3-16 doi: 10.3109/08037051.2014.868629[published Online First: Epub Date]].
31. Ferrario CM, Flack JM, Strobeck JE, Smits G, Peters C. Individualizing hypertension treatment with impedance cardiography: a meta-analysis of published trials. *Therapeutic advances in cardiovascular disease* 2010;**4**(1):5-16 doi: 10.1177/1753944709348236[published Online First: Epub Date]].
32. Fadl Elmula FE, Reborja P, Talvik A, et al. A randomized and controlled study of noninvasive hemodynamic monitoring as a guide to drug treatment of uncontrolled hypertensive patients.

Manuscript ID bmjopen-2017-017493

Revised version 04-09-2017 without highlight of changes

- Journal of hypertension 2015;**33**(12):2534-45 doi: 10.1097/hjh.0000000000000749[published Online First: Epub Date]].
33. Global guideline for type 2 diabetes. *Diabetes research and clinical practice* 2014;**104**(1):1-52 doi: 10.1016/j.diabres.2012.10.001[published Online First: Epub Date]].
34. Steffensen C, Thomsen RW, Vaag A, et al. The Danish Centre for Strategic Research in Type 2 Diabetes (DD2) Project: rationale and planned nationwide studies of genetic predictors, physical exercise, and individualized pharmacological treatment. *Clinical epidemiology* 2012;**4**(Suppl 1):7-13 doi: 10.2147/clep.s30188[published Online First: Epub Date]].
35. Nielsen JS, Thomsen RW, Steffensen C, Christiansen JS. The Danish Centre for Strategic Research in Type 2 Diabetes (DD2) study: implementation of a nationwide patient enrollment system. *Clinical epidemiology* 2012;**4**(Suppl 1):27-36 doi: 10.2147/CLEP.S30838[published Online First: Epub Date]].
36. Thomsen RW, Friberg S, Nielsen JS, Schroll H, Johnsen SP. The Danish Centre for Strategic Research in Type 2 Diabetes (DD2): organization of diabetes care in Denmark and supplementary data sources for data collection among DD2 study participants. *Clinical epidemiology* 2012;**4**(Suppl 1):15-9 doi: 10.2147/CLEP.S30082[published Online First: Epub Date]].
37. Schmidt M, Schmidt SA, Sandegaard JL, Ehrenstein V, Pedersen L, Sorensen HT. The Danish National Patient Registry: a review of content, data quality, and research potential. *Clinical epidemiology* 2015;**7**:449-90 doi: 10.2147/clep.s91125[published Online First: Epub Date]].
38. Thomsen RW, Pedersen L, Moller N, Kahlert J, Beck-Nielsen H, Sorensen HT. Incretin-based therapy and risk of acute pancreatitis: a nationwide population-based case-control study. *Diabetes care* 2015;**38**(6):1089-98 doi: 10.2337/dc13-2983[published Online First: Epub Date]].
39. Pottegard A, Schmidt SA, Wallach-Kildemoes H, Sorensen HT, Hallas J, Schmidt M. Data Resource Profile: The Danish National Prescription Registry. *International journal of epidemiology* 2016 doi: 10.1093/ije/dyw213[published Online First: Epub Date]].
40. Beck-Nielsen H, Solomon TP, Lauridsen J, et al. The Danish Centre for Strategic Research in Type 2 Diabetes (DD2) study: expected outcome from the DD2 project and two intervention studies. *Clinical epidemiology* 2012;**4**(Suppl 1):21-6 doi: 10.2147/CLEP.S30655[published Online First: Epub Date]].
41. Christensen H, Nielsen JS, Sorensen KM, Melbye M, Brandslund I. New national Biobank of The Danish Center for Strategic Research on Type 2 Diabetes (DD2). *Clinical epidemiology* 2012;**4**:37-42 doi: 10.2147/clep.s33042[published Online First: Epub Date]].
42. Thomsen RW, Nielsen JS, Ulrichsen SP, Pedersen L, Hansen AM, Nilsson T. The Danish Centre for Strategic Research in Type 2 Diabetes (DD2) study: Collection of baseline data from the first 580 patients. *Clinical epidemiology* 2012;**4**:43-8 doi: 10.2147/CLEP.S30083[published Online First: Epub Date]].
43. Schneller MB, Bentsen P, Nielsen G, et al. Measuring Children's Physical Activity: Compliance Using Skin-taped Accelerometers. *Medicine and science in sports and exercise* 2017 doi: 10.1249/mss.0000000000001222[published Online First: Epub Date]].
44. Schneller MB, Bentsen P, Nielsen G, et al. Measuring Children's Physical Activity: Compliance Using Skin-Taped Accelerometers. *Medicine and science in sports and exercise* 2017;**49**(6):1261-69 doi: 10.1249/mss.0000000000001222[published Online First: Epub Date]].
45. Meerwaldt R, Graaff R, Oomen PH, et al. Simple non-invasive assessment of advanced glycation endproduct accumulation. *Diabetologia* 2004;**47**(7):1324-30 doi: 10.1007/s00125-004-1451-2[published Online First: Epub Date]].
46. Touboul PJ, Hennerici MG, Meairs S, et al. Mannheim carotid intima-media thickness and plaque consensus (2004-2006-2011). An update on behalf of the advisory board of the 3rd, 4th and 5th watching the risk symposia, at the 13th, 15th and 20th European Stroke Conferences, Mannheim, Germany, 2004, Brussels, Belgium, 2006, and Hamburg, Germany, 2011. *Cerebrovasc Dis* 2012;**34**(4):290-6 doi: 10.1159/000343145[published Online First: Epub Date]].

Manuscript ID bmjopen-2017-017493

Revised version 04-09-2017 without highlight of changes

- 1  
2  
3  
4 47. Grading diabetic retinopathy from stereoscopic color fundus photographs--an extension of the modified  
5 Airlie House classification. ETDRS report number 10. Early Treatment Diabetic Retinopathy Study  
6 Research Group. *Ophthalmology* 1991;**98**(5 Suppl):786-806  
7  
8 48. Hubbard LD, Brothers RJ, King WN, et al. Methods for evaluation of retinal microvascular abnormalities  
9 associated with hypertension/sclerosis in the Atherosclerosis Risk in Communities Study.  
10 *Ophthalmology* 1999;**106**(12):2269-80  
11  
12 49. Seino Y, Kuwata H, Yabe D. Incretin-based drugs for type 2 diabetes: Focus on East Asian perspectives.  
13 *Journal of diabetes investigation* 2016;**7** Suppl 1:102-9 doi: 10.1111/jdi.12490[published Online  
14 First: Epub Date]].  
15  
16 50. Ried-Larsen M, Thomsen RW, Berencsi K, et al. Implementation of interval walking training in patients  
17 with type 2 diabetes in Denmark: rationale, design, and baseline characteristics. *Clinical  
18 epidemiology* 2016;**8**:201-9 doi: 10.2147/cep.s97303[published Online First: Epub Date]].  
19  
20 51. Brinklov CF, Thorsen IK, Karstoft K, et al. Criterion validity and reliability of a smartphone delivered sub-  
21 maximal fitness test for people with type 2 diabetes. *BMC sports science, medicine and  
22 rehabilitation* 2016;**8**:31 doi: 10.1186/s13102-016-0056-7[published Online First: Epub Date]].  
23  
24  
25  
26  
27  
28  
29  
30  
31  
32  
33  
34  
35  
36  
37  
38  
39  
40  
41  
42  
43  
44  
45  
46  
47  
48  
49  
50  
51  
52  
53  
54  
55  
56  
57  
58  
59  
60

Manuscript ID bmjopen-2017-017493

Revised version 04-09-2017 without highlight of changes

**Table 1. Data sources.**

| Variables                                                                                       | Source                                    | Intervention | Control      |
|-------------------------------------------------------------------------------------------------|-------------------------------------------|--------------|--------------|
| Baseline biochemical measurements from whole blood, plasma and urine (eg. C-peptide and GAD-ab) | DD2 biobank                               | Yes          | Yes          |
| DNA samples                                                                                     | DD2 biobank                               | Yes          | Yes          |
| Baseline clinical variables (smoking, physical exercise, alcohol consumption)                   | DD2 interview                             | Yes          | Yes          |
| Longitudinal clinical biochemical measurements (HbA1c, Lipids, s-creatinine, U-ACR)             | The Danish Laboratory Registry            | Yes          | Yes          |
| Longitudinal clinical measures (BMI, waist, blood pressure, smoking)                            | Danish Diabetes Database for Adults       | Yes          | Yes          |
| Medical history at baseline (Hospital contact history)                                          | the Danish National Patient Register      | Yes          | Yes          |
| Medical events during the study (hospital contacts)                                             | the Danish National Patient Register      | Yes          | Yes          |
| Medication prior to baseline                                                                    | the Danish National Prescription Registry | Yes          | Yes          |
| Medication during the study                                                                     | the Danish National Prescription Registry | Yes          | Yes          |
| Intended medication                                                                             | National electronic medicine chart "FMK"  | Yes          | Yes          |
| Socioeconomic variables                                                                         | Statistics Denmark                        | Yes          | Yes          |
| Quality of life at baseline and longitudinally                                                  | DD2                                       | Yes          | Yes          |
| Cardiovascular surrogate markers obtained at IDA examinations                                   | Study measurements                        | Yes          | No           |
| Daily physical activity at IDA examinations                                                     | Study measurements                        | Yes          | No           |
| Patient-reported medical history and medication use                                             | Study interview                           | Yes          | No           |
| Cardiac impedance                                                                               | Study measurement                         | Yes          | No           |
| Blood pressure and HbA1c goal                                                                   | DD2                                       | Yes          | Not relevant |



Manuscript ID bmjopen-2017-017493

Revised version 04-09-2017 without highlight of changes

**Table 2. Endpoint definitions.**

ICD-10 codes for diagnoses and operation codes were obtained from the Danish National Patient Registry, as follows:

|                                                                                                        |                                                                                                                                                                                                                                                                                                                                                           |
|--------------------------------------------------------------------------------------------------------|-----------------------------------------------------------------------------------------------------------------------------------------------------------------------------------------------------------------------------------------------------------------------------------------------------------------------------------------------------------|
| Non-fatal myocardial infarction                                                                        | I21-23, T822A, T823 (without death within 30 days)                                                                                                                                                                                                                                                                                                        |
| Coronary revascularization                                                                             | KFNG, KFNA, KFNB, KFNC, KFND, KFNE, KFNF, KFNH, KFNW, KFLF                                                                                                                                                                                                                                                                                                |
| Cardiac arrest with resuscitation                                                                      | I46                                                                                                                                                                                                                                                                                                                                                       |
| Hospitalization for heart failure                                                                      | I50, I11.0, I13.0+2 (only as a-diagnosis)                                                                                                                                                                                                                                                                                                                 |
| Non-fatal stroke (including cerebral hemorrhage)                                                       | I61, I63, I64, KAAL10, KAAL11 (without death within 30 days)                                                                                                                                                                                                                                                                                              |
| Development of nephropathy                                                                             | BJFD2 (chronic dialysis) or<br>UACR>300g/mg or<br>Doubling of creatinine (if creatinine >=200uM)                                                                                                                                                                                                                                                          |
| Development of retinopathy                                                                             | KCKC10, KCKC15 (Laser therapy) or<br>DH360K AND KCKD05B<br>KCKD65 (vitrectomy) or<br>H540+1+4 (blindness)                                                                                                                                                                                                                                                 |
| Severe hypoglycemia leading to hospitalization                                                         | E15, E160-2, T383A                                                                                                                                                                                                                                                                                                                                        |
| Cancer (except basocellular carcinoma)                                                                 | C00-99 (except when ZM809xx are added)                                                                                                                                                                                                                                                                                                                    |
| Amputation of the lower limbs:                                                                         | KNEQ, KNFQ, KNGQ, KNHQ                                                                                                                                                                                                                                                                                                                                    |
| Revascularization procedures and peripheral thrombosis (not cardiovascular or cerebrovascular disease) | I74, N280, K550-1, K558-9, H340-2<br>KPBE+F+H+N+P+Q, KPBW, KPGH10.<br>KPGE+F+H+N+P+Q, KPGW99, KPGW20,<br>KPEE+F+H+N+P+Q+W, KPFE+H+N+P+Q+W,<br>KPGH20+21+22+23+30+31+40+99,<br>KPDU74+82+83+84, KPEU74+82+83+84,<br>KPFU74+82+83+84, KPAE+F+H+N+P+Q, KPAW99,<br>KPAU74, KPCE+F+H+N+P+Q, KPCW99, KPCW20,<br>KPCU74+82+83+84, KPGU74+83+84+99, KPGW,<br>KPWG |
| Fatal acute myocardial infarction                                                                      | I21-23, T822A, T823, R96-99 with death within 30 days                                                                                                                                                                                                                                                                                                     |
| Fatal stroke                                                                                           | I61, I63, I64 with death within 30 days                                                                                                                                                                                                                                                                                                                   |

**Figure 1. Study timeline.****Figure 2. Recruitment flowchart at GP level****Figure 3. Recruitment (A) and GP contacts in the intervention group (B)**

1  
2  
3  
4  
5  
6  
7  
8  
9  
10  
11  
12  
13  
14  
15  
16  
17  
18  
19  
20  
21  
22  
23  
24  
25  
26  
27  
28  
29  
30  
31  
32  
33  
34  
35  
36  
37  
38  
39  
40  
41  
42  
43  
44  
45  
46  
47  
48  
49  
50  
51  
52  
53  
54  
55  
56  
57  
58  
59  
60

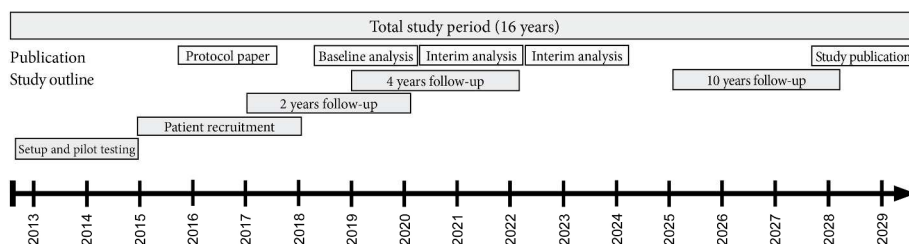

Figure 1. Study timeline

297x210mm (300 x 300 DPI)

ew only



1  
2  
3  
4  
5  
6  
7  
8  
9  
10  
11  
12  
13  
14  
15  
16  
17  
18  
19  
20  
21  
22  
23  
24  
25  
26  
27  
28  
29  
30  
31  
32  
33  
34  
35  
36  
37  
38  
39  
40  
41  
42  
43  
44  
45  
46  
47  
48  
49  
50  
51  
52  
53  
54  
55  
56  
57  
58  
59  
60

**Figure 2. Recruitment flowchart at GP level**

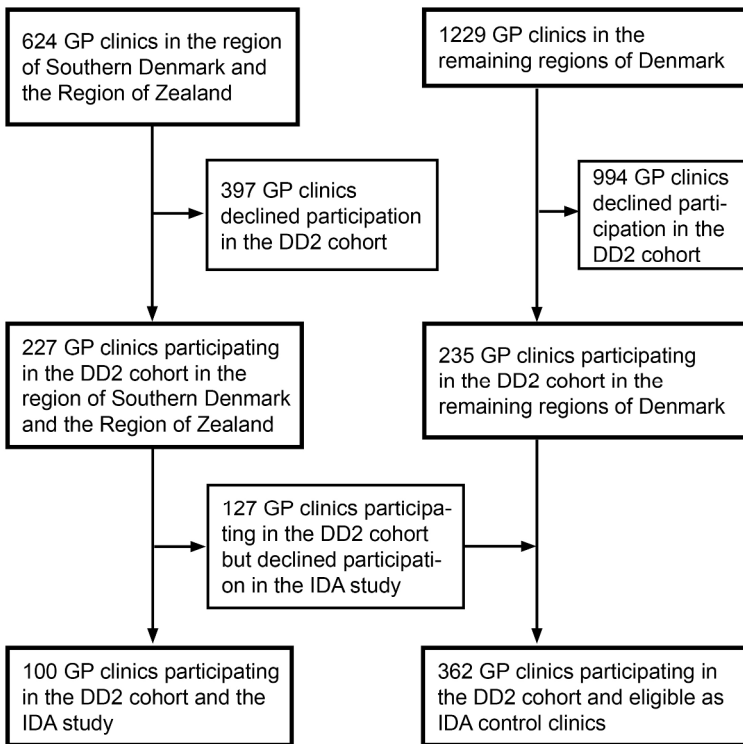

Figure 2. Recruitment flowchart at GP level

210x297mm (300 x 300 DPI)

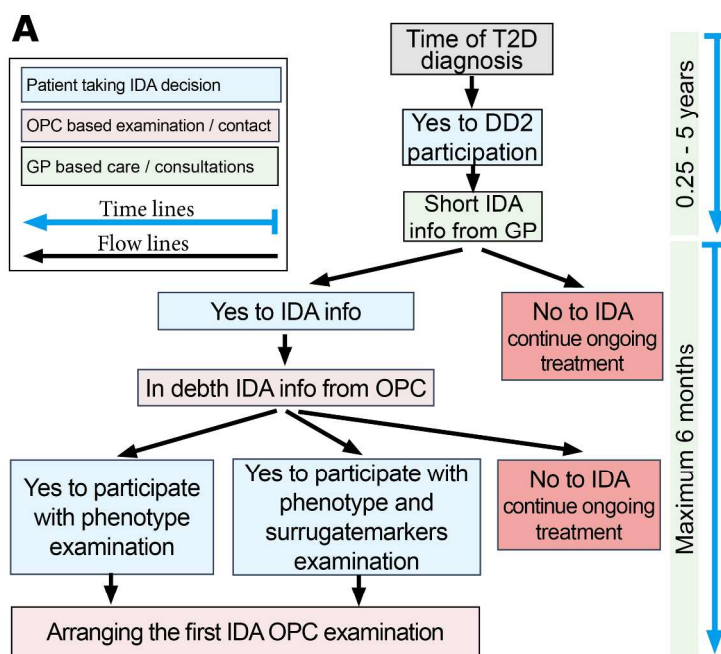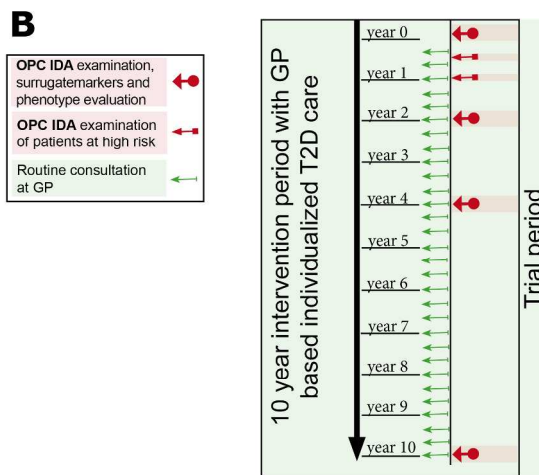

Figure 3. Recruitment (A) and GP contacts in the intervention group (B)

210x297mm (300 x 300 DPI)

Manuscript ID bmjopen-2017-017493  
Revised version 04-09-2017

Supplemental material

## **Protocol for the Individualized multifactorial treatment of new clinically diagnosed type 2 diabetes in general practice (IDA)**

### **- A prospective controlled multicenter open-label intervention study**

#### **Motivation for the proposed glucose-lowering treatment of specific pathophysiological phenotypes**

Ideally, treatment should target the pathophysiological abnormalities. As patients with insulinopenic T2D have beta cell failure, basal insulin and meal-time insulin are recommended. Beta cell failure has been linked to poor response to GLP-analogs[1]. Patients with classical and hyperinsulinemic T2D have high or very high insulin resistance and appear to have increased cardiovascular morbidity at diagnosis[2] compared to patients with insulinopenic T2D with low insulin resistance. The primary focus in these two groups is thus to target insulin resistance. As hyperinsulinemic patients have severe insulin resistance, glitazones are also recommended for this group. Insulin is introduced earlier in the algorithm for classical T2D, as patients in this group also exhibit a degree of beta cell insufficiency. Metformin[3], GLP-1 analogs[4-6], glitazones[7] and SGLT2-inhibitors[8 9] are known to decrease insulin resistance. GLP-1 analogues also increase insulin secretion, restore first- and second-phase insulin response, and reduce glucagon secretion and body weight. A meta-analysis of randomized trials of pioglitazone reported a reduced incidence of death, myocardial infarction, and stroke compared to other medications[10 11]. This finding is supported by favorable effects on cardiovascular surrogate markers[7]. However, the incidence of heart failure was increased by pioglitazone treatment[10 11], and pioglitazone also increase the risk of fractures in women[12]. Pioglitazone has been linked to bladder cancer[13], but a recent multipopulation analysis, focusing on statistical procedures minimizing allocation bias found no such association[14]. In addition

Manuscript ID bmjopen-2017-017493  
Revised version 04-09-2017

1  
2  
3  
4 recent long-term study, including a case-control design, was not able to link bladder cancer to use of  
5  
6 pioglitazone[15]. GLP-1 analogs are chosen over dipeptidyl peptidase-4 (DDP-4) inhibitors as GLP-1 analogs  
7  
8 reduce weight and cardiovascular disease and mortality[16], while DDP-4 inhibitors have no proven effect  
9  
10 on weight or macro- and microvascular complications[17]. An increased risk of heart failure might also be  
11  
12 present[17 18]. Moreover DDP-4 inhibitors do not seem to reduce insulin resistance[19]. For these reasons  
13  
14 we only recommend DDP-4 inhibitors in patients who do not want to use GLP-1 analogs. In case insulin  
15  
16 becomes relevant we recommend the DDP-4 inhibitor to be discontinued in order to reduce medication  
17  
18 which has no proven effect on clinical endpoints. In patients of Asian inheritance incretin-based therapy has  
19  
20 been shown to be more effective and is therefore first-line treatment in Asia[20]. Evidence is accumulating  
21  
22 that SGLT-2 inhibitors decrease the risk of major adverse cardiovascular events, cardiovascular death, heart  
23  
24 failure, and death from any cause [21-23]. SGLT-2 inhibitors also induce weight reduction. The primary  
25  
26 population, in the dominating studies, has been patients with prior cardiovascular disease and therefore we  
27  
28 only recommend SGLT-2 inhibitors in this subpopulation. Sodium retention is decreased by GLP-1 analogs  
29  
30 and SGLT-2 inhibitors, and increased by pioglitazone. The rationale for introducing pioglitazone after GLP-1  
31  
32 analogs and SGLT-2 inhibitors is to minimize pioglitazone-induced sodium and fluid retention, thereby  
33  
34 preventing heart failure in susceptible patients. Bariatric surgery has been shown to reduce mortality,  
35  
36 cardiovascular morbidity, and cancer incidence compared to usual care [24-26], and analyses restricted to  
37  
38 diabetic patients have had the same results [27]. Diabetes remission rates also remained high after 10 years  
39  
40 [24]. The Swedish Obese Subjects (SOS) study found that fasting insulin levels predicted a successful  
41  
42 surgical outcome, in terms of mortality and CVD [24]. This supports bariatric surgery as a recommendation  
43  
44 for patients with hyperinsulinemic T2D.  
45  
46  
47  
48  
49  
50  
51  
52

53  
54 The degree of evidence varies for managing specific forms of diabetes. As patients with secondary diabetes  
55  
56 have a primary beta cell defect, basal and meal-time insulin are recommended [28]. Patients with latent  
57  
58 autoimmune diabetes of the adult (LADA) have diabetes-related antibodies, as seen in type 1 diabetes, but  
59  
60 initially present as a T2D phenotype. Over time patients with LADA develop beta cell insufficiency, and

Manuscript ID bmjopen-2017-017493

Revised version 04-09-2017

1  
2  
3  
4 therefore basal and meal-time insulin are recommended. A review concluded that insulin therapy preserves  
5  
6 beta cell function better than sulphonylureas, although relevant studies on treatment of LADA are scarce  
7  
8 [29]. Since many patients with LADA have a type 2 diabetes phenotype with adipositas, metformin is also  
9  
10 recommended if BMI>25kg/m<sup>2</sup>. Maturity-onset diabetes of the young (MODY) encompasses several  
11  
12 monogenetic forms of diabetes. Patients with MODY3 and MODY1 have insulin secretion defects that  
13  
14 respond to sulphonylureas[30 31]. Patients with MODY2 have a mutation in the glucokinase gene, which  
15  
16 alters the set point of glucose control, while glucose regulation is intact [32 33]. Patients with MODY 2  
17  
18 rarely develop complications and the preferred intervention is diet.  
19  
20  
21  
22

23 Administration of glucocorticosteroids has the potential to induce diabetes onset and to exacerbate  
24  
25 existing type 2 diabetes. It has been reported that prednisolone in particular enhances postprandial plasma  
26  
27 glucose values in patients without known diabetes, with unchanged glucose levels at night and in the  
28  
29 morning [34-36]. The same results have been reported for patients with type 2 diabetes, impaired glucose  
30  
31 tolerance and normal glucose tolerance,[37-39]. Glucocorticoids impair both IS and BCF [40]. Evidence for  
32  
33 optimal treatment of steroid-induced diabetes is sparse and based on case reports. Accordingly, there is  
34  
35 little consensus regarding treatment. Insulin isophane (NPH) has been advocated [41], as well as prandial  
36  
37 insulin [40]. In patients with metabolic syndrome or T2D, it has been found that sitagliptin did not improve  
38  
39 GC-induced postprandial glucose excursions. [42 43]. Nateglinid [35 39] and glitazones have shown some  
40  
41 benefit [44 45] and metformin has been found to improve postprandial glucose values from well above 11  
42  
43 to below 7.5 mmol/l in one patient[43]. Intravenous administration of exenatide has been observed to  
44  
45 improve postprandial glucose values [46], but only when administered at breakfast and lunch [47]. In cases  
46  
47 treated with exenatide, addition of SU was needed to achieve glycemic control. A comparative study of  
48  
49 NPH insulin and insulin glargine with bolus insulin found that glucose control could be achieved, with no  
50  
51 differences between agents [48].  
52  
53  
54  
55  
56  
57  
58

#### 59 **Motivation for the proposed individual lifestyle intervention**

60

Manuscript ID bmjopen-2017-017493

Revised version 04-09-2017

1  
2  
3  
4 Web- and smartphone-based applications are a possible means for effective and time-saving patient  
5  
6 counseling. However, they can result in low compliance over time and thus may be unfeasible as stand-  
7  
8 alone lifestyle interventions. A Danish internet platform called Liva has been developed during the past  
9  
10 decade by a team of dietitians, computer programmers, and physicians as a commercial weight  
11  
12 management program. Its guiding principle is to improve the cost-effectiveness of established best practice  
13  
14 for dietician-supported weight management by using an Internet platform to facilitate interactive  
15  
16 communication between dietitians and users, as well as by peer-to-peer support through the online  
17  
18 community. The program was developed iteratively through trial and error from an initial prototype and is  
19  
20 now a well-established commercial product used by 10,000 predominantly healthy overweight or  
21  
22 moderately obese persons. The effect of online dietician counseling based on this system was examined in  
23  
24 a prospective non-controlled pilot study in obese subjects, and an average weight loss of 7.0 kg (95% CI: 4.6  
25  
26 to 9.3 kg) was observed after 20 months,[49].  
27  
28  
29  
30  
31

32  
33 In Denmark, diet recommendations for the general population and for patients with T2D are 45%-60E%  
34  
35 carbohydrates, 10%-20E% proteins, and 25%-40E% fat[50]. It is being debated whether a diet with reduced  
36  
37 carbohydrates (40E% fat, 40E% carbohydrates, and 20E% proteins) and an increased amount of  
38  
39 unsaturated fat favors glycemic control in patients with T2D compared to current recommendations [51  
40  
41 52]. Several studies support the beneficial effects of the reduced carbohydrate diet on glycemic control for  
42  
43 patients with T2D [53].  
44  
45  
46  
47

48 Poor physical fitness is one of the most important independent predictors of disease progression,  
49  
50 morbidity, and mortality for patients with T2D [54 55]. It has been found that supervised exercise increases  
51  
52 fitness,[56]. With the increasing prevalence and incidence of T2D, fully supervised training programs for all  
53  
54 T2D patients would be very costly and thus unrealistic. We recently tested the feasibility of implementing  
55  
56 unsupervised interval walking training (IWT), compared with continuous walking training, among patients  
57  
58 with T2D in a four-month randomized controlled trial [57]. We found that IWT, but not continuous walking,  
59  
60

Manuscript ID bmjopen-2017-017493  
Revised version 04-09-2017

1  
2  
3  
4 had remarkably beneficial effects on physical fitness level and glycemic control. Moreover, this was  
5  
6 achieved with a compliance rate of ~90% [57] and high long-term adherence [58]. We later tested the  
7  
8 unsupervised IWT modality for 17 months in a setting with a compliance rate of >60%[59]. On this basis, we  
9  
10 believe that the IWT exercise modality can be implemented as unsupervised exercise in a real-life setting.  
11  
12 To permit large-scale implementation, guide correct training intensity, and improve feasibility for patients,  
13  
14 we developed a smartphone application (InterWalk) that can be downloaded free of charge from App  
15  
16 Store.  
17  
18  
19

### 20 21 **Motivation for the proposed lipid-lowering treatment**

22  
23  
24 Statin treatment reduce cardiovascular disease and mortality in type 2 diabetes, with no difference in effect  
25  
26 between phenotypes and with no clear lower LDL-C boundary of effect[60]. Intensive statin treatment  
27  
28 compared to moderate statin treatment in type 2 diabetes patients with prior cardiovascular disease  
29  
30 reduce a combined cardiovascular endpoint[61]. Addition of ezetimibe to statins are not extensively  
31  
32 investigated and addition to high dose statin dose is not evaluated[62]. PCSK9 inhibitors do provide  
33  
34 additional lowering of LDL-C when added to other lipid lowering medication and might also reduce any  
35  
36 CVD[63]. Further studies is needed to establish the effect on cardiovascular disease. The effect in patients  
37  
38 with diabetes seem to be equal or better than in patients without diabetes. As the evidence on  
39  
40 cardiovascular endpoints for combination of lipid-lowering drugs is low we advocate treatment with statins  
41  
42 in monotherapy.  
43  
44  
45  
46  
47

### 48 **Determination of covariate balance in propensity score matching**

49  
50  
51 The usefulness of the propensity score models can be tested by how well covariates of the intervention and  
52  
53 control patients match. The standardized difference should be used to compare covariates:  
54  
55  
56  
57  
58  
59  
60

Manuscript ID bmjopen-2017-017493  
 Revised version 04-09-2017

$$d = \frac{\bar{X}_{intervention} - \bar{X}_{control}}{\sqrt{\frac{S_{intervention}^2 - S_{control}^2}{2}}}$$

$$d = \frac{\hat{p}_{intervention} - \hat{p}_{control}}{\sqrt{\frac{\hat{p}_{intervention}(1 - \hat{p}_{intervention}) + \hat{p}_{control}(1 - \hat{p}_{control})}{2}}}$$

$\bar{x}$  denotes the mean of a continuous covariate.  $S$  is the variance.  $\hat{p}$  denotes the prevalence of dichotomous covariates. With 1:k matching, the weighted mean should be used. If  $n$  control patients are matched per intervention patient, the weight should be  $1/n$ . A difference below 0.1 is considered acceptable and should be achieved for all covariates [64]. The variance ratio should also be estimated as  $VR = \frac{S_{intervention}^2}{S_{control}^2}$ . Ratios between 0.5 and 2.0 are considered acceptable [65]. If the model does not conform to this criterion, a new model with inclusion of interaction terms and/or higher-order terms will be fitted. A quantile-quantile plot (or similar approach) for each variable (interactions can also be evaluated) should be used to compare the distribution in the intervention and control groups [66].

#### Reference List

1. Jones AG, McDonald TJ, Shields BM, et al. Markers of beta-Cell Failure Predict Poor Glycemic Response to GLP-1 Receptor Agonist Therapy in Type 2 Diabetes. *Diabetes care* 2015 doi: 10.2337/dc15-0258[published Online First: Epub Date].
2. Stidsen JV, Thomsen RW, Nielsen JS, et al. Pathophysiological Phenotypes of Clinically Diagnosed Type 2 Diabetes. Abstracts of the 74th Scientific Sessions of the American Diabetes Association, June 13-17, 2014, San Francisco, California. . *Diabetes* 2014;**63 Suppl 1**:A354-55
3. Wiernsperger NF, Bailey CJ. The antihyperglycaemic effect of metformin: therapeutic and cellular mechanisms. *Drugs* 1999;**58 Suppl 1**:31-9; discussion 75-82



Manuscript ID bmjopen-2017-017493

Revised version 04-09-2017

- 1  
2  
3  
4  
5  
6  
7  
8  
9  
10  
11  
12  
13  
14  
15  
16  
17  
18  
19  
20  
21  
22  
23  
24  
25  
26  
27  
28  
29  
30  
31  
32  
33  
34  
35  
36  
37  
38  
39  
40  
41  
42  
43  
44  
45  
46  
47  
48  
49  
50  
51  
52  
53  
54  
55  
56  
57  
58  
59  
60
4. Derosa G, Maffioli P, Salvadeo SA, et al. Exenatide versus glibenclamide in patients with diabetes. *Diabetes technology & therapeutics* 2010;**12**(3):233-40 doi: 10.1089/dia.2009.0141[published Online First: Epub Date]].
5. DeFronzo RA, Triplitt C, Qu Y, Lewis MS, Maggs D, Glass LC. Effects of exenatide plus rosiglitazone on beta-cell function and insulin sensitivity in subjects with type 2 diabetes on metformin. *Diabetes care* 2010;**33**(5):951-7 doi: 10.2337/dc09-1521[published Online First: Epub Date]].
6. Zander M, Madsbad S, Madsen JL, Holst JJ. Effect of 6-week course of glucagon-like peptide 1 on glycaemic control, insulin sensitivity, and beta-cell function in type 2 diabetes: a parallel-group study. *Lancet* 2002;**359**(9309):824-30 doi: 10.1016/s0140-6736(02)07952-7[published Online First: Epub Date]].
7. Derosa G. Efficacy and tolerability of pioglitazone in patients with type 2 diabetes mellitus: comparison with other oral antihyperglycaemic agents. *Drugs* 2010;**70**(15):1945-61 doi: 10.2165/11538100-000000000-00000[published Online First: Epub Date]].
8. Mudaliar S, Henry RR, Boden G, et al. Changes in insulin sensitivity and insulin secretion with the sodium glucose cotransporter 2 inhibitor dapagliflozin. *Diabetes technology & therapeutics* 2014;**16**(3):137-44 doi: 10.1089/dia.2013.0167[published Online First: Epub Date]].
9. Merovci A, Solis-Herrera C, Daniele G, et al. Dapagliflozin improves muscle insulin sensitivity but enhances endogenous glucose production. *The Journal of clinical investigation* 2014;**124**(2):509-14 doi: 10.1172/jci70704[published Online First: Epub Date]].
10. Lincoff AM, Wolski K, Nicholls SJ, Nissen SE. Pioglitazone and risk of cardiovascular events in patients with type 2 diabetes mellitus: a meta-analysis of randomized trials. *JAMA : the journal of the American Medical Association* 2007;**298**(10):1180-8 doi: 10.1001/jama.298.10.1180[published Online First: Epub Date]].
11. Liao HW, Saver JL, Wu YL, Chen TH, Lee M, Ovbiagele B. Pioglitazone and cardiovascular outcomes in patients with insulin resistance, pre-diabetes and type 2 diabetes: a systematic review and meta-analysis. *BMJ open* 2017;**7**(1):e013927 doi: 10.1136/bmjopen-2016-013927[published Online First: Epub Date]].
12. Zhu ZN, Jiang YF, Ding T. Risk of fracture with thiazolidinediones: an updated meta-analysis of randomized clinical trials. *Bone* 2014;**68**:115-23 doi: 10.1016/j.bone.2014.08.010[published Online First: Epub Date]].
13. Neumann A, Weill A, Ricordeau P, Fagot JP, Alla F, Allemand H. Pioglitazone and risk of bladder cancer among diabetic patients in France: a population-based cohort study. *Diabetologia* 2012;**55**(7):1953-62 doi: 10.1007/s00125-012-2538-9[published Online First: Epub Date]].
14. Levin D, Bell S, Sund R, et al. Pioglitazone and bladder cancer risk: a multipopulation pooled, cumulative exposure analysis. *Diabetologia* 2015;**58**(3):493-504 doi: 10.1007/s00125-014-3456-9[published Online First: Epub Date]].
15. Lewis JD, Habel LA, Quesenberry CP, et al. Pioglitazone Use and Risk of Bladder Cancer and Other Common Cancers in Persons With Diabetes. *JAMA : the journal of the American Medical Association* 2015;**314**(3):265-77 doi: 10.1001/jama.2015.7996[published Online First: Epub Date]].
16. Marso SP, Daniels GH, Brown-Frandsen K, et al. Liraglutide and Cardiovascular Outcomes in Type 2 Diabetes. *The New England journal of medicine* 2016;**375**(4):311-22 doi: 10.1056/NEJMoa1603827[published Online First: Epub Date]].
17. Rehman MB, Tudrej BV, Soustre J, et al. Efficacy and safety of DPP-4 inhibitors in patients with type 2 diabetes: Meta-analysis of placebo-controlled randomized clinical trials. *Diabetes & metabolism* 2017;**43**(1):48-58 doi: 10.1016/j.diabet.2016.09.005[published Online First: Epub Date]].
18. Verma S, Goldenberg RM, Bhatt DL, et al. Dipeptidyl peptidase-4 inhibitors and the risk of heart failure: a systematic review and meta-analysis. *CMAJ open* 2017;**5**(1):E152-e77 doi: 10.9778/cmajo.20160058[published Online First: Epub Date]].

Manuscript ID bmjopen-2017-017493

Revised version 04-09-2017

19. Lyu X, Zhu X, Zhao B, et al. Effects of dipeptidyl peptidase-4 inhibitors on beta-cell function and insulin resistance in type 2 diabetes: meta-analysis of randomized controlled trials. *Scientific reports* 2017;**7**:44865 doi: 10.1038/srep44865[published Online First: Epub Date]].
20. Seino Y, Kuwata H, Yabe D. Incretin-based drugs for type 2 diabetes: Focus on East Asian perspectives. *Journal of diabetes investigation* 2016;**7 Suppl 1**:102-9 doi: 10.1111/jdi.12490[published Online First: Epub Date]].
21. Wu JH, Foote C, Blomster J, et al. Effects of sodium-glucose cotransporter-2 inhibitors on cardiovascular events, death, and major safety outcomes in adults with type 2 diabetes: a systematic review and meta-analysis. *The lancet. Diabetes & endocrinology* 2016 doi: 10.1016/s2213-8587(16)00052-8[published Online First: Epub Date]].
22. Zinman B, Wanner C, Lachin JM, et al. Empagliflozin, Cardiovascular Outcomes, and Mortality in Type 2 Diabetes. *The New England journal of medicine* 2015 doi: 10.1056/NEJMoa1504720[published Online First: Epub Date]].
23. Neal B, Perkovic V, Mahaffey KW, et al. Canagliflozin and Cardiovascular and Renal Events in Type 2 Diabetes. *The New England journal of medicine* 2017;**377**(7):644-57 doi: 10.1056/NEJMoa1611925[published Online First: Epub Date]].
24. Sjostrom L. Review of the key results from the Swedish Obese Subjects (SOS) trial - a prospective controlled intervention study of bariatric surgery. *Journal of internal medicine* 2013;**273**(3):219-34 doi: 10.1111/joim.12012[published Online First: Epub Date]].
25. Christou NV, Sampalis JS, Liberman M, et al. Surgery decreases long-term mortality, morbidity, and health care use in morbidly obese patients. *Annals of surgery* 2004;**240**(3):416-23; discussion 23-4
26. Adams TD, Gress RE, Smith SC, et al. Long-term mortality after gastric bypass surgery. *The New England journal of medicine* 2007;**357**(8):753-61 doi: 10.1056/NEJMoa066603[published Online First: Epub Date]].
27. Romeo S, Maglio C, Burza MA, et al. Cardiovascular events after bariatric surgery in obese subjects with type 2 diabetes. *Diabetes care* 2012;**35**(12):2613-7 doi: 10.2337/dc12-0193[published Online First: Epub Date]].
28. Ewald N, Hardt PD. Diagnosis and treatment of diabetes mellitus in chronic pancreatitis. *World journal of gastroenterology : WJG* 2013;**19**(42):7276-81 doi: 10.3748/wjg.v19.i42.7276[published Online First: Epub Date]].
29. Brophy S, Davies H, Mannan S, Brunt H, Williams R. Interventions for latent autoimmune diabetes (LADA) in adults. *Cochrane Database Syst Rev* 2011;**9**:CD006165 doi: 10.1002/14651858.CD006165.pub3[published Online First: Epub Date]].
30. Pearson ER, Pruhova S, Tack CJ, et al. Molecular genetics and phenotypic characteristics of MODY caused by hepatocyte nuclear factor 4alpha mutations in a large European collection. *Diabetologia* 2005;**48**(5):878-85 doi: 10.1007/s00125-005-1738-y[published Online First: Epub Date]].
31. Pearson ER, Liddell WG, Shepherd M, Corral RJ, Hattersley AT. Sensitivity to sulphonylureas in patients with hepatocyte nuclear factor-1alpha gene mutations: evidence for pharmacogenetics in diabetes. *Diabetic medicine : a journal of the British Diabetic Association* 2000;**17**(7):543-5
32. Velho G, Blanche H, Vaxillaire M, et al. Identification of 14 new glucokinase mutations and description of the clinical profile of 42 MODY-2 families. *Diabetologia* 1997;**40**(2):217-24 doi: 10.1007/s001250050666[published Online First: Epub Date]].
33. Byrne MM, Sturis J, Clement K, et al. Insulin secretory abnormalities in subjects with hyperglycemia due to glucokinase mutations. *The Journal of clinical investigation* 1994;**93**(3):1120-30 doi: 10.1172/JCI117064[published Online First: Epub Date]].
34. Iwamoto T, Kagawa Y, Naito Y, Kuzuhara S, Kojima M. Steroid-induced diabetes mellitus and related risk factors in patients with neurologic diseases. *Pharmacotherapy* 2004;**24**(4):508-14
35. Ito S, Ogishima H, Kondo Y, et al. Early diagnosis and treatment of steroid-induced diabetes mellitus in patients with rheumatoid arthritis and other connective tissue diseases. *Modern rheumatology /*

Manuscript ID bmjopen-2017-017493

Revised version 04-09-2017

- 1  
2  
3  
4 the Japan Rheumatism Association 2014;**24**(1):52-9 doi: 10.3109/14397595.2013.852855[published  
5 Online First: Epub Date]].
- 6  
7 36. Burt MG, Roberts GW, Aguilar-Loza NR, Frith P, Stranks SN. Continuous monitoring of circadian glycaemic  
8 patterns in patients receiving prednisolone for COPD. *The Journal of clinical endocrinology and*  
9 *metabolism* 2011;**96**(6):1789-96 doi: 10.1210/jc.2010-2729[published Online First: Epub Date]].
- 10  
11 37. Burt MG, Drake SM, Aguilar-Loza NR, Esterman A, Stranks SN, Roberts GW. Efficacy of a basal bolus  
12 insulin protocol to treat prednisolone-induced hyperglycaemia in hospitalised patients. *Internal*  
13 *medicine journal* 2015;**45**(3):261-6 doi: 10.1111/imj.12680[published Online First: Epub Date]].
- 14  
15 38. Yuen KC, McDaniel PA, Riddle MC. Twenty-four-hour profiles of plasma glucose, insulin, C-peptide and  
16 free fatty acid in subjects with varying degrees of glucose tolerance following short-term, medium-  
17 dose prednisone (20 mg/day) treatment: evidence for differing effects on insulin secretion and  
18 action. *Clinical endocrinology* 2012;**77**(2):224-32 doi: 10.1111/j.1365-2265.2011.04242.x[published  
19 Online First: Epub Date]].
- 20  
21 39. Uzu T, Harada T, Sakaguchi M, et al. Glucocorticoid-induced diabetes mellitus: prevalence and risk  
22 factors in primary renal diseases. *Nephron. Clinical practice* 2007;**105**(2):c54-7 doi:  
23 10.1159/000097598[published Online First: Epub Date]].
- 24  
25 40. van Raalte DH, Diamant M. Steroid diabetes: from mechanism to treatment? *The Netherlands journal of*  
26 *medicine* 2014;**72**(2):62-72
- 27  
28 41. Clore JN, Thurby-Hay L. Glucocorticoid-induced hyperglycemia. *Endocrine practice : official journal of*  
29 *the American College of Endocrinology and the American Association of Clinical Endocrinologists*  
30 2009;**15**(5):469-74 doi: 10.4158/EP08331.RAR[published Online First: Epub Date]].
- 31  
32 42. van Genugten RE, van Raalte DH, Muskiet MH, et al. Does dipeptidyl peptidase-4 inhibition prevent the  
33 diabetogenic effects of glucocorticoids in men with the metabolic syndrome? A randomized  
34 controlled trial. *European journal of endocrinology / European Federation of Endocrine Societies*  
35 2014;**170**(3):429-39 doi: 10.1530/eje-13-0610[published Online First: Epub Date]].
- 36  
37 43. Ishibashi C, Yasuda T, Matsuoka T-a, et al. A case of glucocorticoid-induced diabetes in which the  
38 efficacy between sitagliptin and metformin was compared. *Diabetology International* 2015;**7**(1):89-  
39 94 doi: 10.1007/s13340-015-0209-z[published Online First: Epub Date]].
- 40  
41 44. Luther P, Baldwin D, Jr. Pioglitazone in the management of diabetes mellitus after transplantation.  
42 *American journal of transplantation : official journal of the American Society of Transplantation and*  
43 *the American Society of Transplant Surgeons* 2004;**4**(12):2135-8 doi: 10.1111/j.1600-  
44 6143.2004.00613.x[published Online First: Epub Date]].
- 45  
46 45. Baldwin D, Jr., Duffin KE. Rosiglitazone treatment of diabetes mellitus after solid organ transplantation.  
47 *Transplantation* 2004;**77**(7):1009-14
- 48  
49 46. van Raalte DH, van Genugten RE, Linssen MM, Ouwens DM, Diamant M. Glucagon-like peptide-1  
50 receptor agonist treatment prevents glucocorticoid-induced glucose intolerance and islet-cell  
51 dysfunction in humans. *Diabetes care* 2011;**34**(2):412-7 doi: 10.2337/dc10-1677[published Online  
52 First: Epub Date]].
- 53  
54 47. Matsuo K, Nambu T, Matsuda Y, et al. Evaluation of the effects of exenatide administration in patients  
55 with type 2 diabetes with worsened glycaemic control caused by glucocorticoid therapy. *Intern Med*  
56 2013;**52**(1):89-95
- 57  
58 48. Ruiz de Adana MS, Colomo N, Maldonado-Araque C, et al. Randomized clinical trial of the efficacy and  
59 safety of insulin glargine vs. NPH insulin as basal insulin for the treatment of glucocorticoid induced  
60 hyperglycemia using continuous glucose monitoring in hospitalized patients with type 2 diabetes  
and respiratory disease. *Diabetes research and clinical practice* 2015;**110**(2):158-65 doi:  
10.1016/j.diabres.2015.09.015[published Online First: Epub Date]].
49. Brandt V, Brandt CJ, Glinborg D, Arendal C, Toubro S, Brandt K. Sustained Weight Loss during 20  
Months using a Personalized Interactive Internet Based Dietician Advice Program in a General  
Practice Setting. *International Journal on Advances in Life Sciences* 2011;**3**(no. 1 & 2):23-28

Manuscript ID bmjopen-2017-017493  
Revised version 04-09-2017

- 1
- 2
- 3
- 4
- 5 50. Järvinen B, Ólafsson S, Sletsjøe H, et al. *Nordic Nutrition Recommendations 2012 - Integrating nutrition*
- 6 *and physical activity*95946. Nordic Council of Ministers: Nordic Council of Ministers, 2014.
- 7 51. van Wyk HJ, Davis RE, Davies JS. A critical review of low-carbohydrate diets in people with Type 2
- 8 diabetes. *Diabetic medicine : a journal of the British Diabetic Association* 2016;**33**(2):148-57 doi:
- 9 10.1111/dme.12964[published Online First: Epub Date]].
- 10 52. Asplund K, Axelsen M, Berglund G, et al. Dietary Treatment of Diabetes - A Systematic Review. In:
- 11 ROSÉN M, ed. SBU Board of Directors and Scientific Advisory Committee. Stockholm SBU, 2010.
- 12 53. Emadian A, Andrews RC, England CY, Wallace V, Thompson JL. The effect of macronutrients on
- 13 glycaemic control: a systematic review of dietary randomised controlled trials in overweight and
- 14 obese adults with type 2 diabetes in which there was no difference in weight loss between
- 15 treatment groups. *The British journal of nutrition* 2015;**114**(10):1656-66 doi:
- 16 10.1017/s0007114515003475[published Online First: Epub Date]].
- 17 54. Gulati M, Black HR, Shaw LJ, et al. The prognostic value of a nomogram for exercise capacity in women.
- 18 *The New England journal of medicine* 2005;**353**(5):468-75 doi: 10.1056/NEJMoa044154[published
- 19 Online First: Epub Date]].
- 20 55. Hainer V, Toplak H, Stich V. Fat or fit: what is more important? *Diabetes care* 2009;**32** **Suppl 2**:S392-7
- 21 doi: 10.2337/dc09-S346[published Online First: Epub Date]].
- 22 56. Umpierre D, Ribeiro PA, Schaan BD, Ribeiro JP. Volume of supervised exercise training impacts
- 23 glycaemic control in patients with type 2 diabetes: a systematic review with meta-regression
- 24 analysis. *Diabetologia* 2013;**56**(2):242-51 doi: 10.1007/s00125-012-2774-z[published Online First:
- 25 Epub Date]].
- 26 57. Karstoft K, Winding K, Knudsen SH, et al. The effects of free-living interval-walking training on glycemic
- 27 control, body composition, and physical fitness in type 2 diabetic patients: a randomized, controlled
- 28 trial. *Diabetes care* 2013;**36**(2):228-36 doi: 10.2337/dc12-0658[published Online First: Epub Date]].
- 29 58. Ried-Larsen M, Thomsen RW, Berencsi K, et al. Implementation of interval walking training in patients
- 30 with Type 2 diabetes in Denmark; Rationale, design and baseline characteristics. *Clinical*
- 31 *Epidemiology* 2016;**in press**
- 32 59. Ried-Larsen M, Thomsen RW, Berencsi K, et al. Implementation of interval walking training in patients
- 33 with type 2 diabetes in Denmark: rationale, design, and baseline characteristics. *Clinical*
- 34 *epidemiology* 2016;**8**:201-9 doi: 10.2147/cep.s97303[published Online First: Epub Date]].
- 35 60. Cholesterol Treatment Trialists C, Kearney PM, Blackwell L, et al. Efficacy of cholesterol-lowering
- 36 therapy in 18,686 people with diabetes in 14 randomised trials of statins: a meta-analysis. *Lancet*
- 37 2008;**371**(9607):117-25 doi: 10.1016/S0140-6736(08)60104-X[published Online First: Epub Date]].
- 38 61. de Vries FM, Kolthof J, Postma MJ, Denig P, Hak E. Efficacy of standard and intensive statin treatment
- 39 for the secondary prevention of cardiovascular and cerebrovascular events in diabetes patients: a
- 40 meta-analysis. *PloS one* 2014;**9**(11):e111247 doi: 10.1371/journal.pone.0111247[published Online
- 41 First: Epub Date]].
- 42 62. Fei Y, Guyatt GH, Alexander PE, et al. Addition of Ezetimibe to statins for patients at high cardiovascular
- 43 risk: Systematic review of patient-important outcomes. *Journal of evaluation in clinical practice*
- 44 2017 doi: 10.1111/jep.12663[published Online First: Epub Date]].
- 45 63. Schmidt AF, Pearce LS, Wilkins JT, Overington JP, Hingorani AD, Casas JP. PCSK9 monoclonal antibodies
- 46 for the primary and secondary prevention of cardiovascular disease. *Cochrane Database Syst Rev*
- 47 2017;**4**:Cd011748 doi: 10.1002/14651858.CD011748.pub2[published Online First: Epub Date]].
- 48 64. Austin PC. An Introduction to Propensity Score Methods for Reducing the Effects of Confounding in
- 49 Observational Studies. *Multivariate behavioral research* 2011;**46**(3):399-424 doi:
- 50 10.1080/00273171.2011.568786[published Online First: Epub Date]].
- 51 65. Linden A, Samuels SJ. Using balance statistics to determine the optimal number of controls in matching
- 52 studies. *Journal of evaluation in clinical practice* 2013;**19**(5):968-75 doi:
- 53 10.1111/jep.12072[published Online First: Epub Date]].
- 54
- 55
- 56
- 57
- 58
- 59
- 60

Manuscript ID bmjopen-2017-017493  
Revised version 04-09-2017

66. Linden A. Graphical displays for assessing covariate balance in matching studies. Journal of evaluation in clinical practice 2015;**21**(2):242-7 doi: 10.1111/jep.12297[published Online First: Epub Date]|.

For peer review only

1  
2  
3  
4  
5  
6  
7  
8  
9  
10  
11  
12  
13  
14  
15  
16  
17  
18  
19  
20  
21  
22  
23  
24  
25  
26  
27  
28  
29  
30  
31  
32  
33  
34  
35  
36  
37  
38  
39  
40  
41  
42  
43  
44  
45  
46  
47  
48  
49  
50  
51  
52  
53  
54  
55  
56  
57  
58  
59  
60
