# Supplementary material for: Protocol for the specialist supervised individualised multifactorial treatment of new clinically diagnosed type 2 diabetes in general practice (IDA): a prospective controlled multicentre open-label intervention study
Source: PubMed Central journal article supplement — BMJ Open. 2017 Dec 10;7(12):e017493. doi: 10.1136/bmjopen-2017-017493 (PMC5778341; doi:10.1136/bmjopen-2017-017493), 2017-12-10
Supplement: bmjopen-2017-017493supp001.pdf [file bmjopen-2017-017493supp001.pdf]

Supplemental material

**Protocol for the Individualized multifactorial treatment of new clinically diagnosed type 2 diabetes in general practice (IDA)**

**- A prospective controlled multicenter open-label intervention study**

**Motivation for the proposed glucose-lowering treatment of specific pathophysiological phenotypes**

Ideally, treatment should target the pathophysiological abnormalities. As patients with insulinopenic T2D have beta cell failure, basal insulin and meal-time insulin are recommended. Beta cell failure has been linked to poor response to GLP-analogs[1]. Patients with classical and hyperinsulinemic T2D have high or very high insulin resistance and appear to have increased cardiovascular morbidity at diagnosis[2] compared to patients with insulinopenic T2D with low insulin resistance. The primary focus in these two groups is thus to target insulin resistance. As hyperinsulinemic patients have severe insulin resistance, glitazones are also recommended for this group. Insulin is introduced earlier in the algorithm for classical T2D, as patients in this group also exhibit a degree of beta cell insufficiency. Metformin[3], GLP-1 analogs[4-6], glitazones[7] and SGLT2-inhibitors[8 9] are known to decrease insulin resistance. GLP-1 analogues also increase insulin secretion, restore first- and second-phase insulin response, and reduce glucagon secretion and body weight. A meta-analysis of randomized trials of pioglitazone reported a reduced incidence of death, myocardial infarction, and stroke compared to other medications[10 11]. This finding is supported by favorable effects on cardiovascular surrogate markers[7]. However, the incidence of heart failure was increased by pioglitazone treatment[10 11], and pioglitazone also increase the risk of fractures in women[12]. Pioglitazone has been linked to bladder cancer[13], but a recent multipopulation analysis, focusing on statistical procedures minimizing allocation bias found no such association[14]. In addition

recent long-term study, including a case-control design, was not able to link bladder cancer to use of pioglitazone[15]. GLP-1 analogs are chosen over dipeptidyl peptidase-4 (DDP-4) inhibitors as GLP-1 analogs reduce weight and cardiovascular disease and mortality[16], while DDP-4 inhibitors have no proven effect on weight or macro- and microvascular complications[17]. An increased risk of heart failure might also be present[17 18]. Moreover DDP-4 inhibitors do not seem to reduce insulin resistance[19]. For these reasons we only recommend DDP-4 inhibitors in patients who do not want to use GLP-1 analogs. In case insulin becomes relevant we recommend the DDP-4 inhibitor to be discontinued in order to reduce medication which has no proven effect on clinical endpoints. In patients of Asian inheritance incretin-based therapy has been shown to be more effective and is therefore first-line treatment in Asia[20]. Evidence is accumulating that SGLT-2 inhibitors decrease the risk of major adverse cardiovascular events, cardiovascular death, heart failure, and death from any cause [21-23]. SGLT-2 inhibitors also induce weight reduction. The primary population, in the dominating studies, has been patients with prior cardiovascular disease and therefore we only recommend SGLT-2 inhibitors in this subpopulation. Sodium retention is decreased by GLP-1 analogs and SGLT-2 inhibitors, and increased by pioglitazone. The rationale for introducing pioglitazone after GLP-1 analogs and SGLT-2 inhibitors is to minimize pioglitazone-induced sodium and fluid retention, thereby preventing heart failure in susceptible patients. Bariatric surgery has been shown to reduce mortality, cardiovascular morbidity, and cancer incidence compared to usual care [24-26], and analyses restricted to diabetic patients have had the same results [27]. Diabetes remission rates also remained high after 10 years [24]. The Swedish Obese Subjects (SOS) study found that fasting insulin levels predicted a successful surgical outcome, in terms of mortality and CVD [24]. This supports bariatric surgery as a recommendation for patients with hyperinsulinemic T2D.

The degree of evidence varies for managing specific forms of diabetes. As patients with secondary diabetes have a primary beta cell defect, basal and meal-time insulin are recommended [28]. Patients with latent autoimmune diabetes of the adult (LADA) have diabetes-related antibodies, as seen in type 1 diabetes, but initially present as a T2D phenotype. Over time patients with LADA develop beta cell insufficiency, and

therefore basal and meal-time insulin are recommended. A review concluded that insulin therapy preserves beta cell function better than sulphonylureas, although relevant studies on treatment of LADA are scarce [29]. Since many patients with LADA have a type 2 diabetes phenotype with adipositas, metformin is also recommended if BMI>25kg/m<sup>2</sup>. Maturity-onset diabetes of the young (MODY) encompasses several monogenetic forms of diabetes. Patients with MODY3 and MODY1 have insulin secretion defects that respond to sulphonylureas[30 31]. Patients with MODY2 have a mutation in the glucokinase gene, which alters the set point of glucose control, while glucose regulation is intact [32 33]. Patients with MODY 2 rarely develop complications and the preferred intervention is diet.

Administration of glucocorticosteroids has the potential to induce diabetes onset and to exacerbate existing type 2 diabetes. It has been reported that prednisolone in particular enhances postprandial plasma glucose values in patients without known diabetes, with unchanged glucose levels at night and in the morning [34-36]. The same results have been reported for patients with type 2 diabetes, impaired glucose tolerance and normal glucose tolerance,[37-39]. Glucocorticoids impair both IS and BCF [40]. Evidence for optimal treatment of steroid-induced diabetes is sparse and based on case reports. Accordingly, there is little consensus regarding treatment. Insulin isophane (NPH) has been advocated [41], as well as prandial insulin [40]. In patients with metabolic syndrome or T2D, it has been found that sitagliptin did not improve GC-induced postprandial glucose excursions. [42 43]. Nateglinid [35 39] and glitazones have shown some benefit [44 45] and metformin has been found to improve postprandial glucose values from well above 11 to below 7.5 mmol/l in one patient[43]. Intravenous administration of exenatide has been observed to improve postprandial glucose values [46], but only when administered at breakfast and lunch [47]. In cases treated with exenatide, addition of SU was needed to achieve glycemic control. A comparative study of NPH insulin and insulin glargine with bolus insulin found that glucose control could be achieved, with no differences between agents [48].

### **Motivation for the proposed individual lifestyle intervention**

Web- and smartphone-based applications are a possible means for effective and time-saving patient counseling. However, they can result in low compliance over time and thus may be unfeasible as stand-alone lifestyle interventions. A Danish internet platform called Liva has been developed during the past decade by a team of dietitians, computer programmers, and physicians as a commercial weight management program. Its guiding principle is to improve the cost-effectiveness of established best practice for dietician-supported weight management by using an Internet platform to facilitate interactive communication between dietitians and users, as well as by peer-to-peer support through the online community. The program was developed iteratively through trial and error from an initial prototype and is now a well-established commercial product used by 10,000 predominantly healthy overweight or moderately obese persons. The effect of online dietician counseling based on this system was examined in a prospective non-controlled pilot study in obese subjects, and an average weight loss of 7.0 kg (95% CI: 4.6 to 9.3 kg) was observed after 20 months,[49].

In Denmark, diet recommendations for the general population and for patients with T2D are 45%-60E% carbohydrates, 10%-20E% proteins, and 25%-40E% fat[50]. It is being debated whether a diet with reduced carbohydrates (40E% fat, 40E% carbohydrates, and 20E% proteins) and an increased amount of unsaturated fat favors glycemic control in patients with T2D compared to current recommendations [51 52]. Several studies support the beneficial effects of the reduced carbohydrate diet on glycemic control for patients with T2D [53].

Poor physical fitness is one of the most important independent predictors of disease progression, morbidity, and mortality for patients with T2D [54 55]. It has been found that supervised exercise increases fitness,[56]. With the increasing prevalence and incidence of T2D, fully supervised training programs for all T2D patients would be very costly and thus unrealistic. We recently tested the feasibility of implementing unsupervised interval walking training (IWT), compared with continuous walking training, among patients with T2D in a four-month randomized controlled trial [57]. We found that IWT, but not continuous walking,

had remarkably beneficial effects on physical fitness level and glycemic control. Moreover, this was achieved with a compliance rate of ~90% [57] and high long-term adherence [58]. We later tested the unsupervised IWT modality for 17 months in a setting with a compliance rate of >60%[59]. On this basis, we believe that the IWT exercise modality can be implemented as unsupervised exercise in a real-life setting. To permit large-scale implementation, guide correct training intensity, and improve feasibility for patients, we developed a smartphone application (InterWalk) that can be downloaded free of charge from App Store.

### **Motivation for the proposed lipid-lowering treatment**

Statin treatment reduce cardiovascular disease and mortality in type 2 diabetes, with no difference in effect between phenotypes and with no clear lower LDL-C boundary of effect[60]. Intensive statin treatment compared to moderate statin treatment in type 2 diabetes patients with prior cardiovascular disease reduce a combined cardiovascular endpoint[61]. Addition of ezetimibe to statins are not extensively investigated and addition to high dose statin dose is not evaluated[62]. PCSK9 inhibitors do provide additional lowering of LDL-C when added to other lipid lowering medication and might also reduce any CVD[63]. Further studies is needed to establish the effect on cardiovascular disease. The effect in patients with diabetes seem to be equal or better than in patients without diabetes. As the evidence on cardiovascular endpoints for combination of lipid-lowering drugs is low we advocate treatment with statins in monotherapy.

### **Determination of covariate balance in propensity score matching**

The usefulness of the propensity score models can be tested by how well covariates of the intervention and control patients match. The standardized difference should be used to compare covariates:

$$d = \frac{\bar{X}_{intervention} - \bar{X}_{control}}{\sqrt{\frac{S_{intervention}^2 - S_{control}^2}{2}}}$$

$$d = \frac{\hat{p}_{intervention} - \hat{p}_{control}}{\sqrt{\frac{\hat{p}_{intervention}(1 - \hat{p}_{intervention}) + \hat{p}_{control}(1 - \hat{p}_{control})}{2}}}$$

$\bar{x}$  denotes the mean of a continuous covariate.  $S$  is the variance.  $\hat{p}$  denotes the prevalence of dichotomous covariates. With 1:k matching, the weighted mean should be used. If  $n$  control patients are matched per intervention patient, the weight should be  $1/n$ . A difference below 0.1 is considered acceptable and should be achieved for all covariates [64]. The variance ratio should also be estimated as  $VR = \frac{S_{intervention}^2}{S_{control}^2}$ . Ratios between 0.5 and 2.0 are considered acceptable [65]. If the model does not conform to this criterion, a new model with inclusion of interaction terms and/or higher-order terms will be fitted. A quantile-quantile plot (or similar approach) for each variable (interactions can also be evaluated) should be used to compare the distribution in the intervention and control groups [66].

#### Reference List

1. Jones AG, McDonald TJ, Shields BM, et al. Markers of beta-Cell Failure Predict Poor Glycemic Response to GLP-1 Receptor Agonist Therapy in Type 2 Diabetes. *Diabetes care* 2015 doi: 10.2337/dc15-0258[published Online First: Epub Date].
2. Stidsen JV, Thomsen RW, Nielsen JS, et al. Pathophysiological Phenotypes of Clinically Diagnosed Type 2 Diabetes. Abstracts of the 74th Scientific Sessions of the American Diabetes Association, June 13-17, 2014, San Francisco, California. . *Diabetes* 2014;**63 Suppl 1**:A354-55
3. Wiernsperger NF, Bailey CJ. The antihyperglycaemic effect of metformin: therapeutic and cellular mechanisms. *Drugs* 1999;**58 Suppl 1**:31-9; discussion 75-82

4. Derosa G, Maffioli P, Salvadeo SA, et al. Exenatide versus glibenclamide in patients with diabetes. *Diabetes technology & therapeutics* 2010;**12**(3):233-40 doi: 10.1089/dia.2009.0141[published Online First: Epub Date]].
5. DeFronzo RA, Triplitt C, Qu Y, Lewis MS, Maggs D, Glass LC. Effects of exenatide plus rosiglitazone on beta-cell function and insulin sensitivity in subjects with type 2 diabetes on metformin. *Diabetes care* 2010;**33**(5):951-7 doi: 10.2337/dc09-1521[published Online First: Epub Date]].
6. Zander M, Madsbad S, Madsen JL, Holst JJ. Effect of 6-week course of glucagon-like peptide 1 on glycaemic control, insulin sensitivity, and beta-cell function in type 2 diabetes: a parallel-group study. *Lancet* 2002;**359**(9309):824-30 doi: 10.1016/s0140-6736(02)07952-7[published Online First: Epub Date]].
7. Derosa G. Efficacy and tolerability of pioglitazone in patients with type 2 diabetes mellitus: comparison with other oral antihyperglycaemic agents. *Drugs* 2010;**70**(15):1945-61 doi: 10.2165/11538100-000000000-00000[published Online First: Epub Date]].
8. Mudaliar S, Henry RR, Boden G, et al. Changes in insulin sensitivity and insulin secretion with the sodium glucose cotransporter 2 inhibitor dapagliflozin. *Diabetes technology & therapeutics* 2014;**16**(3):137-44 doi: 10.1089/dia.2013.0167[published Online First: Epub Date]].
9. Merovci A, Solis-Herrera C, Daniele G, et al. Dapagliflozin improves muscle insulin sensitivity but enhances endogenous glucose production. *The Journal of clinical investigation* 2014;**124**(2):509-14 doi: 10.1172/jci70704[published Online First: Epub Date]].
10. Lincoff AM, Wolski K, Nicholls SJ, Nissen SE. Pioglitazone and risk of cardiovascular events in patients with type 2 diabetes mellitus: a meta-analysis of randomized trials. *JAMA : the journal of the American Medical Association* 2007;**298**(10):1180-8 doi: 10.1001/jama.298.10.1180[published Online First: Epub Date]].
11. Liao HW, Saver JL, Wu YL, Chen TH, Lee M, Ovbiagele B. Pioglitazone and cardiovascular outcomes in patients with insulin resistance, pre-diabetes and type 2 diabetes: a systematic review and meta-analysis. *BMJ open* 2017;**7**(1):e013927 doi: 10.1136/bmjopen-2016-013927[published Online First: Epub Date]].
12. Zhu ZN, Jiang YF, Ding T. Risk of fracture with thiazolidinediones: an updated meta-analysis of randomized clinical trials. *Bone* 2014;**68**:115-23 doi: 10.1016/j.bone.2014.08.010[published Online First: Epub Date]].
13. Neumann A, Weill A, Ricordeau P, Fagot JP, Alla F, Allemand H. Pioglitazone and risk of bladder cancer among diabetic patients in France: a population-based cohort study. *Diabetologia* 2012;**55**(7):1953-62 doi: 10.1007/s00125-012-2538-9[published Online First: Epub Date]].
14. Levin D, Bell S, Sund R, et al. Pioglitazone and bladder cancer risk: a multipopulation pooled, cumulative exposure analysis. *Diabetologia* 2015;**58**(3):493-504 doi: 10.1007/s00125-014-3456-9[published Online First: Epub Date]].
15. Lewis JD, Habel LA, Quesenberry CP, et al. Pioglitazone Use and Risk of Bladder Cancer and Other Common Cancers in Persons With Diabetes. *JAMA : the journal of the American Medical Association* 2015;**314**(3):265-77 doi: 10.1001/jama.2015.7996[published Online First: Epub Date]].
16. Marso SP, Daniels GH, Brown-Frandsen K, et al. Liraglutide and Cardiovascular Outcomes in Type 2 Diabetes. *The New England journal of medicine* 2016;**375**(4):311-22 doi: 10.1056/NEJMoa1603827[published Online First: Epub Date]].
17. Rehman MB, Tudrej BV, Soustre J, et al. Efficacy and safety of DPP-4 inhibitors in patients with type 2 diabetes: Meta-analysis of placebo-controlled randomized clinical trials. *Diabetes & metabolism* 2017;**43**(1):48-58 doi: 10.1016/j.diabet.2016.09.005[published Online First: Epub Date]].
18. Verma S, Goldenberg RM, Bhatt DL, et al. Dipeptidyl peptidase-4 inhibitors and the risk of heart failure: a systematic review and meta-analysis. *CMAJ open* 2017;**5**(1):E152-e77 doi: 10.9778/cmajo.20160058[published Online First: Epub Date]].

19. Lyu X, Zhu X, Zhao B, et al. Effects of dipeptidyl peptidase-4 inhibitors on beta-cell function and insulin resistance in type 2 diabetes: meta-analysis of randomized controlled trials. *Scientific reports* 2017;**7**:44865 doi: 10.1038/srep44865[published Online First: Epub Date]].
20. Seino Y, Kuwata H, Yabe D. Incretin-based drugs for type 2 diabetes: Focus on East Asian perspectives. *Journal of diabetes investigation* 2016;**7 Suppl 1**:102-9 doi: 10.1111/jdi.12490[published Online First: Epub Date]].
21. Wu JH, Foote C, Blomster J, et al. Effects of sodium-glucose cotransporter-2 inhibitors on cardiovascular events, death, and major safety outcomes in adults with type 2 diabetes: a systematic review and meta-analysis. *The lancet. Diabetes & endocrinology* 2016 doi: 10.1016/s2213-8587(16)00052-8[published Online First: Epub Date]].
22. Zinman B, Wanner C, Lachin JM, et al. Empagliflozin, Cardiovascular Outcomes, and Mortality in Type 2 Diabetes. *The New England journal of medicine* 2015 doi: 10.1056/NEJMoa1504720[published Online First: Epub Date]].
23. Neal B, Perkovic V, Mahaffey KW, et al. Canagliflozin and Cardiovascular and Renal Events in Type 2 Diabetes. *The New England journal of medicine* 2017;**377**(7):644-57 doi: 10.1056/NEJMoa1611925[published Online First: Epub Date]].
24. Sjostrom L. Review of the key results from the Swedish Obese Subjects (SOS) trial - a prospective controlled intervention study of bariatric surgery. *Journal of internal medicine* 2013;**273**(3):219-34 doi: 10.1111/joim.12012[published Online First: Epub Date]].
25. Christou NV, Sampalis JS, Liberman M, et al. Surgery decreases long-term mortality, morbidity, and health care use in morbidly obese patients. *Annals of surgery* 2004;**240**(3):416-23; discussion 23-4
26. Adams TD, Gress RE, Smith SC, et al. Long-term mortality after gastric bypass surgery. *The New England journal of medicine* 2007;**357**(8):753-61 doi: 10.1056/NEJMoa066603[published Online First: Epub Date]].
27. Romeo S, Maglio C, Burza MA, et al. Cardiovascular events after bariatric surgery in obese subjects with type 2 diabetes. *Diabetes care* 2012;**35**(12):2613-7 doi: 10.2337/dc12-0193[published Online First: Epub Date]].
28. Ewald N, Hardt PD. Diagnosis and treatment of diabetes mellitus in chronic pancreatitis. *World journal of gastroenterology : WJG* 2013;**19**(42):7276-81 doi: 10.3748/wjg.v19.i42.7276[published Online First: Epub Date]].
29. Brophy S, Davies H, Mannan S, Brunt H, Williams R. Interventions for latent autoimmune diabetes (LADA) in adults. *Cochrane Database Syst Rev* 2011;**9**:CD006165 doi: 10.1002/14651858.CD006165.pub3[published Online First: Epub Date]].
30. Pearson ER, Pruhova S, Tack CJ, et al. Molecular genetics and phenotypic characteristics of MODY caused by hepatocyte nuclear factor 4alpha mutations in a large European collection. *Diabetologia* 2005;**48**(5):878-85 doi: 10.1007/s00125-005-1738-y[published Online First: Epub Date]].
31. Pearson ER, Liddell WG, Shepherd M, Corrall RJ, Hattersley AT. Sensitivity to sulphonylureas in patients with hepatocyte nuclear factor-1alpha gene mutations: evidence for pharmacogenetics in diabetes. *Diabetic medicine : a journal of the British Diabetic Association* 2000;**17**(7):543-5
32. Velho G, Blanche H, Vaxillaire M, et al. Identification of 14 new glucokinase mutations and description of the clinical profile of 42 MODY-2 families. *Diabetologia* 1997;**40**(2):217-24 doi: 10.1007/s001250050666[published Online First: Epub Date]].
33. Byrne MM, Sturis J, Clement K, et al. Insulin secretory abnormalities in subjects with hyperglycemia due to glucokinase mutations. *The Journal of clinical investigation* 1994;**93**(3):1120-30 doi: 10.1172/JCI117064[published Online First: Epub Date]].
34. Iwamoto T, Kagawa Y, Naito Y, Kuzuhara S, Kojima M. Steroid-induced diabetes mellitus and related risk factors in patients with neurologic diseases. *Pharmacotherapy* 2004;**24**(4):508-14
35. Ito S, Ogishima H, Kondo Y, et al. Early diagnosis and treatment of steroid-induced diabetes mellitus in patients with rheumatoid arthritis and other connective tissue diseases. *Modern rheumatology /*

- the Japan Rheumatism Association 2014;**24**(1):52-9 doi: 10.3109/14397595.2013.852855[published Online First: Epub Date]].
36. Burt MG, Roberts GW, Aguilar-Loza NR, Frith P, Stranks SN. Continuous monitoring of circadian glycaemic patterns in patients receiving prednisolone for COPD. *The Journal of clinical endocrinology and metabolism* 2011;**96**(6):1789-96 doi: 10.1210/jc.2010-2729[published Online First: Epub Date]].
  37. Burt MG, Drake SM, Aguilar-Loza NR, Esterman A, Stranks SN, Roberts GW. Efficacy of a basal bolus insulin protocol to treat prednisolone-induced hyperglycaemia in hospitalised patients. *Internal medicine journal* 2015;**45**(3):261-6 doi: 10.1111/imj.12680[published Online First: Epub Date]].
  38. Yuen KC, McDaniel PA, Riddle MC. Twenty-four-hour profiles of plasma glucose, insulin, C-peptide and free fatty acid in subjects with varying degrees of glucose tolerance following short-term, medium-dose prednisone (20 mg/day) treatment: evidence for differing effects on insulin secretion and action. *Clinical endocrinology* 2012;**77**(2):224-32 doi: 10.1111/j.1365-2265.2011.04242.x[published Online First: Epub Date]].
  39. Uzu T, Harada T, Sakaguchi M, et al. Glucocorticoid-induced diabetes mellitus: prevalence and risk factors in primary renal diseases. *Nephron. Clinical practice* 2007;**105**(2):c54-7 doi: 10.1159/000097598[published Online First: Epub Date]].
  40. van Raalte DH, Diamant M. Steroid diabetes: from mechanism to treatment? *The Netherlands journal of medicine* 2014;**72**(2):62-72
  41. Clore JN, Thurby-Hay L. Glucocorticoid-induced hyperglycemia. *Endocrine practice : official journal of the American College of Endocrinology and the American Association of Clinical Endocrinologists* 2009;**15**(5):469-74 doi: 10.4158/EP08331.RAR[published Online First: Epub Date]].
  42. van Genugten RE, van Raalte DH, Muskiet MH, et al. Does dipeptidyl peptidase-4 inhibition prevent the diabetogenic effects of glucocorticoids in men with the metabolic syndrome? A randomized controlled trial. *European journal of endocrinology / European Federation of Endocrine Societies* 2014;**170**(3):429-39 doi: 10.1530/eje-13-0610[published Online First: Epub Date]].
  43. Ishibashi C, Yasuda T, Matsuoka T-a, et al. A case of glucocorticoid-induced diabetes in which the efficacy between sitagliptin and metformin was compared. *Diabetology International* 2015;**7**(1):89-94 doi: 10.1007/s13340-015-0209-z[published Online First: Epub Date]].
  44. Luther P, Baldwin D, Jr. Pioglitazone in the management of diabetes mellitus after transplantation. *American journal of transplantation : official journal of the American Society of Transplantation and the American Society of Transplant Surgeons* 2004;**4**(12):2135-8 doi: 10.1111/j.1600-6143.2004.00613.x[published Online First: Epub Date]].
  45. Baldwin D, Jr., Duffin KE. Rosiglitazone treatment of diabetes mellitus after solid organ transplantation. *Transplantation* 2004;**77**(7):1009-14
  46. van Raalte DH, van Genugten RE, Linssen MM, Ouwens DM, Diamant M. Glucagon-like peptide-1 receptor agonist treatment prevents glucocorticoid-induced glucose intolerance and islet-cell dysfunction in humans. *Diabetes care* 2011;**34**(2):412-7 doi: 10.2337/dc10-1677[published Online First: Epub Date]].
  47. Matsuo K, Nambu T, Matsuda Y, et al. Evaluation of the effects of exenatide administration in patients with type 2 diabetes with worsened glycaemic control caused by glucocorticoid therapy. *Intern Med* 2013;**52**(1):89-95
  48. Ruiz de Adana MS, Colomo N, Maldonado-Araque C, et al. Randomized clinical trial of the efficacy and safety of insulin glargine vs. NPH insulin as basal insulin for the treatment of glucocorticoid induced hyperglycemia using continuous glucose monitoring in hospitalized patients with type 2 diabetes and respiratory disease. *Diabetes research and clinical practice* 2015;**110**(2):158-65 doi: 10.1016/j.diabres.2015.09.015[published Online First: Epub Date]].
  49. Brandt V, Brandt CJ, Glinborg D, Arendal C, Toubro S, Brandt K. Sustained Weight Loss during 20 Months using a Personalized Interactive Internet Based Dietician Advice Program in a General Practice Setting. *International Journal on Advances in Life Sciences* 2011;**3**(no. 1 & 2):23-28

50. Järvinen B, Ólafsson S, Sletsjøe H, et al. *Nordic Nutrition Recommendations 2012 - Integrating nutrition and physical activity*95946. Nordic Council of Ministers: Nordic Council of Ministers, 2014.
51. van Wyk HJ, Davis RE, Davies JS. A critical review of low-carbohydrate diets in people with Type 2 diabetes. *Diabetic medicine : a journal of the British Diabetic Association* 2016;**33**(2):148-57 doi: 10.1111/dme.12964[published Online First: Epub Date]].
52. Asplund K, Axelsen M, Berglund G, et al. Dietary Treatment of Diabetes - A Systematic Review. In: ROSÉN M, ed. SBU Board of Directors and Scientific Advisory Committee. Stockholm SBU, 2010.
53. Emadian A, Andrews RC, England CY, Wallace V, Thompson JL. The effect of macronutrients on glycaemic control: a systematic review of dietary randomised controlled trials in overweight and obese adults with type 2 diabetes in which there was no difference in weight loss between treatment groups. *The British journal of nutrition* 2015;**114**(10):1656-66 doi: 10.1017/s0007114515003475[published Online First: Epub Date]].
54. Gulati M, Black HR, Shaw LJ, et al. The prognostic value of a nomogram for exercise capacity in women. *The New England journal of medicine* 2005;**353**(5):468-75 doi: 10.1056/NEJMoa044154[published Online First: Epub Date]].
55. Hainer V, Toplak H, Stich V. Fat or fit: what is more important? *Diabetes care* 2009;**32** Suppl 2:S392-7 doi: 10.2337/dc09-S346[published Online First: Epub Date]].
56. Umpierre D, Ribeiro PA, Schaun BD, Ribeiro JP. Volume of supervised exercise training impacts glycaemic control in patients with type 2 diabetes: a systematic review with meta-regression analysis. *Diabetologia* 2013;**56**(2):242-51 doi: 10.1007/s00125-012-2774-z[published Online First: Epub Date]].
57. Karstoft K, Winding K, Knudsen SH, et al. The effects of free-living interval-walking training on glycemic control, body composition, and physical fitness in type 2 diabetic patients: a randomized, controlled trial. *Diabetes care* 2013;**36**(2):228-36 doi: 10.2337/dc12-0658[published Online First: Epub Date]].
58. Ried-Larsen M, Thomsen RW, Berencsi K, et al. Implementation of interval walking training in patients with Type 2 diabetes in Denmark; Rationale, design and baseline characteristics. *Clinical Epidemiology* 2016;**in press**
59. Ried-Larsen M, Thomsen RW, Berencsi K, et al. Implementation of interval walking training in patients with type 2 diabetes in Denmark: rationale, design, and baseline characteristics. *Clinical epidemiology* 2016;**8**:201-9 doi: 10.2147/cep.s97303[published Online First: Epub Date]].
60. Cholesterol Treatment Trialists C, Kearney PM, Blackwell L, et al. Efficacy of cholesterol-lowering therapy in 18,686 people with diabetes in 14 randomised trials of statins: a meta-analysis. *Lancet* 2008;**371**(9607):117-25 doi: 10.1016/S0140-6736(08)60104-X[published Online First: Epub Date]].
61. de Vries FM, Kolthof J, Postma MJ, Denig P, Hak E. Efficacy of standard and intensive statin treatment for the secondary prevention of cardiovascular and cerebrovascular events in diabetes patients: a meta-analysis. *PloS one* 2014;**9**(11):e111247 doi: 10.1371/journal.pone.0111247[published Online First: Epub Date]].
62. Fei Y, Guyatt GH, Alexander PE, et al. Addition of Ezetimibe to statins for patients at high cardiovascular risk: Systematic review of patient-important outcomes. *Journal of evaluation in clinical practice* 2017 doi: 10.1111/jep.12663[published Online First: Epub Date]].
63. Schmidt AF, Pearce LS, Wilkins JT, Overington JP, Hingorani AD, Casas JP. PCSK9 monoclonal antibodies for the primary and secondary prevention of cardiovascular disease. *Cochrane Database Syst Rev* 2017;**4**:Cd011748 doi: 10.1002/14651858.CD011748.pub2[published Online First: Epub Date]].
64. Austin PC. An Introduction to Propensity Score Methods for Reducing the Effects of Confounding in Observational Studies. *Multivariate behavioral research* 2011;**46**(3):399-424 doi: 10.1080/00273171.2011.568786[published Online First: Epub Date]].
65. Linden A, Samuels SJ. Using balance statistics to determine the optimal number of controls in matching studies. *Journal of evaluation in clinical practice* 2013;**19**(5):968-75 doi: 10.1111/jep.12072[published Online First: Epub Date]].

66. Linden A. Graphical displays for assessing covariate balance in matching studies. *Journal of evaluation in clinical practice* 2015;**21**(2):242-7 doi: 10.1111/jep.12297[published Online First: Epub Date]|.
